# Supplementary material for: Rhodium(i)/bisoxazolinephosphine-catalyzed regio- and enantioselective amination of allylic carbonates: a computational study
Source: Royal Society of Chemistry journal article supplement (doi:10.1039/d1qo00370d), 2021-01-01
Supplement: d1qo00370d1.pdf [file d1qo00370d1.pdf]

*Supporting Information*

**Rhodium(I)/Bisoxazolinephosphine-Catalyzed Regio- and  
Enantioselective Amination of Allylic Carbonates: A  
Computational Study**

Yu Shi, Hongli Wu, Genping Huang\*

Department of Chemistry, School of Science and Tianjin Key Laboratory of  
Molecular Optoelectronic Sciences, Tianjin University, Tianjin 300072, P. R. China.

E-mail: gphuang@tju.edu.cn

**Table of Contents:**

|                                                                              |            |
|------------------------------------------------------------------------------|------------|
| <b>1. Formation of IM0</b>                                                   | <b>S2</b>  |
| <b>2. Other possibilities for the C-O oxidative addition</b>                 | <b>S3</b>  |
| <b>3. Allylic isomerization</b>                                              | <b>S4</b>  |
| <b>4. C-N bond formation</b>                                                 | <b>S5</b>  |
| <b>5. Deprotonation and off-cycle decarboxylation</b>                        | <b>S7</b>  |
| <b>6. C-N bond formation via the deprotonation/C-N reductive elimination</b> | <b>S8</b>  |
| <b>7. AIM analysis</b>                                                       | <b>S9</b>  |
| <b>8. Table of calculated energies and energy corrections</b>                | <b>S10</b> |
| <b>9. Cartesian coordinates</b>                                              | <b>S12</b> |

## 1. Formation of IM0

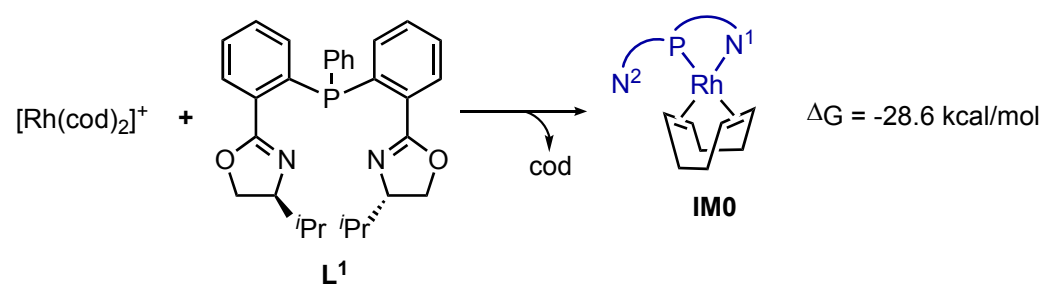

**Scheme S1.** Ligand exchange between  $[\text{Rh}(\text{cod})_2]^+$  and  $\text{L}^1$  to form intermediate **IM0**.

## 2. Other possibilities for the C-O oxidative addition

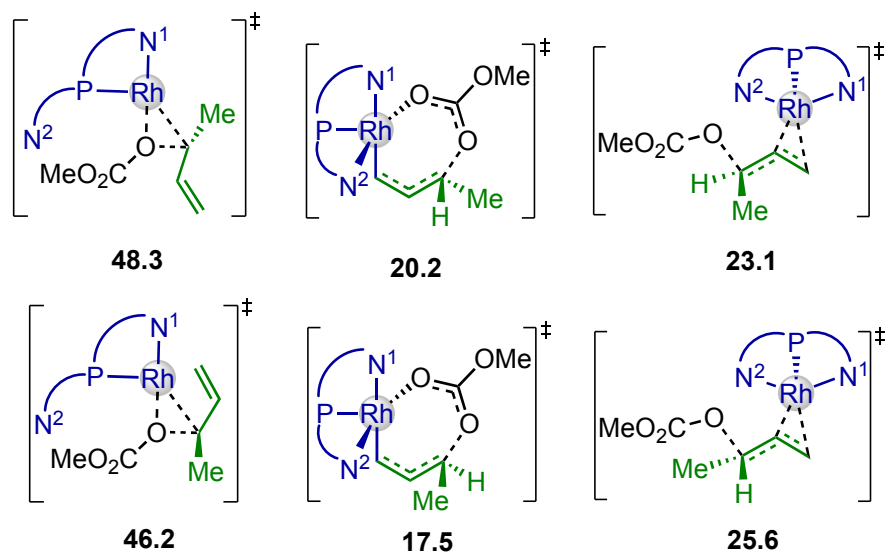

**Scheme S2.** C-O oxidative addition via three- and seven-membered cyclic transition states and S<sub>N</sub>2 front-side attack transition state. Energies are given in kcal/mol.

### 3. Allylic isomerization

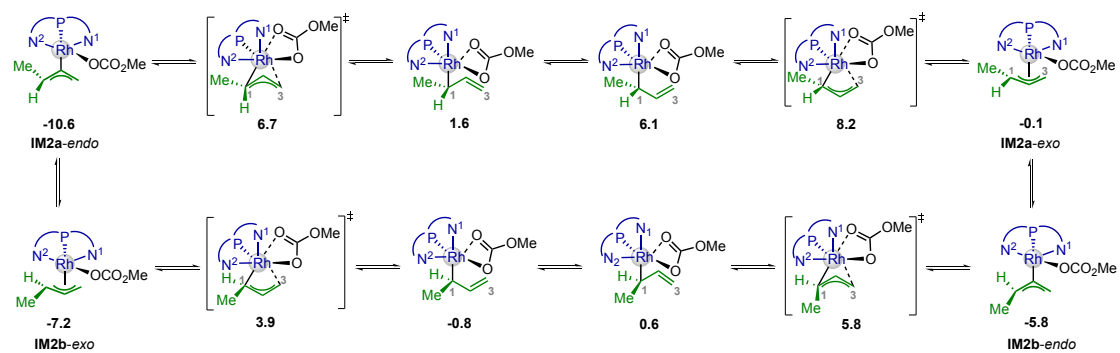

**Scheme S3.** Allylic isomerization of the other species. Energies are given in kcal/mol.

#### 4. C-N bond formation

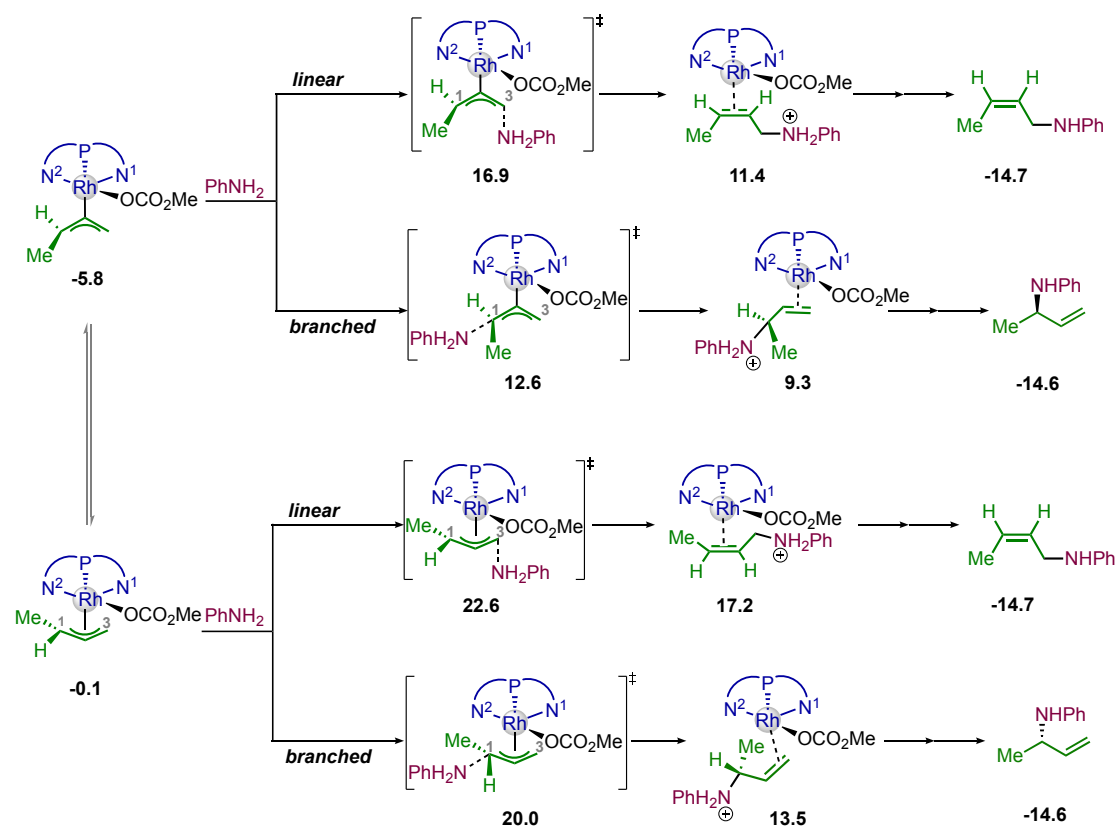

**Scheme S4.** C-N bond formation via the nucleophilic attack from **IM2a-exo** and **IM2b-endo**. Energies are given in kcal/mol.

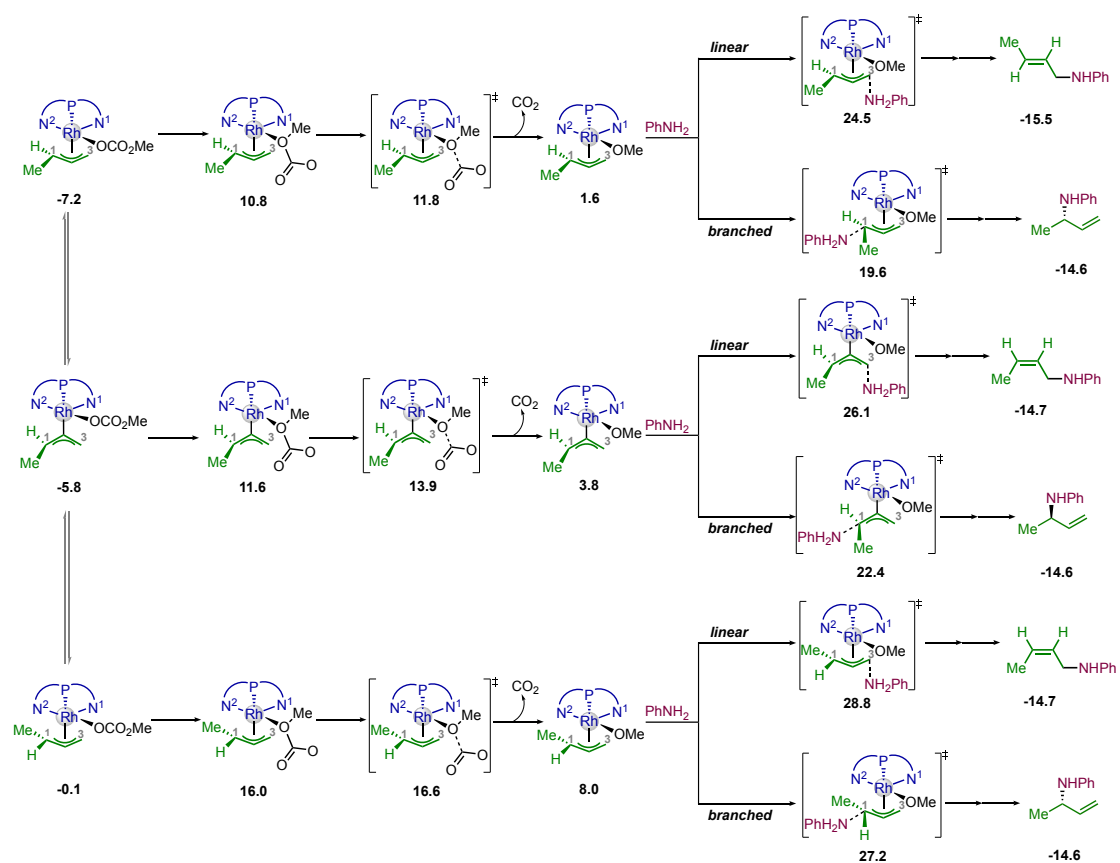

**Scheme S5.** C-N bond formation via the decarboxylation/nucleophilic attack from **IM2a-exo**, **IM2b-exo** and **IM2b-endo**. Energies are given in kcal/mol.

## 5. Deprotonation and off-cycle decarboxylation

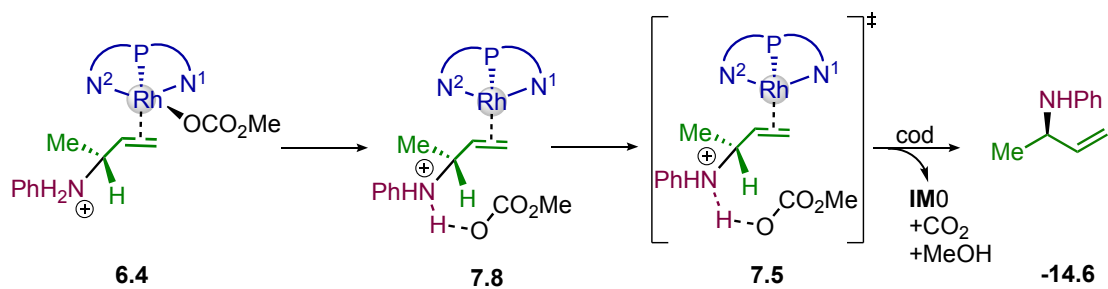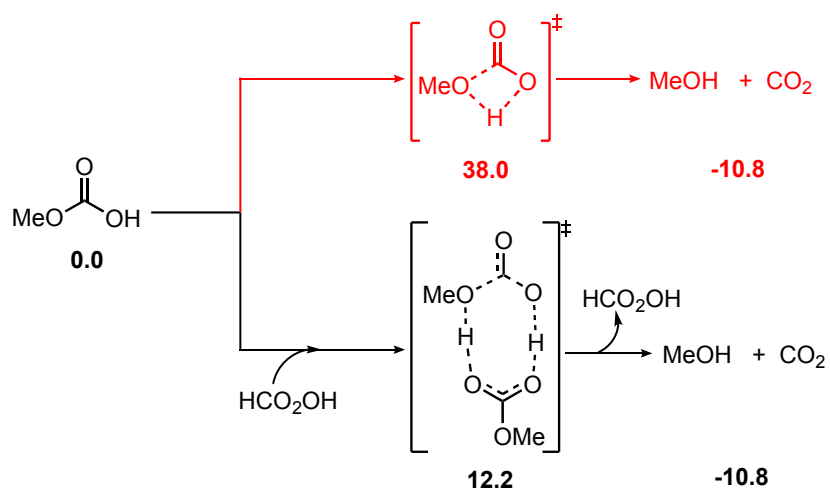

**Scheme S6.** Calculated energies of the deprotonation and off-cycle decarboxylation. Energies are given in kcal/mol.

## 6. C-N bond formation via the deprotonation/C-N reductive elimination

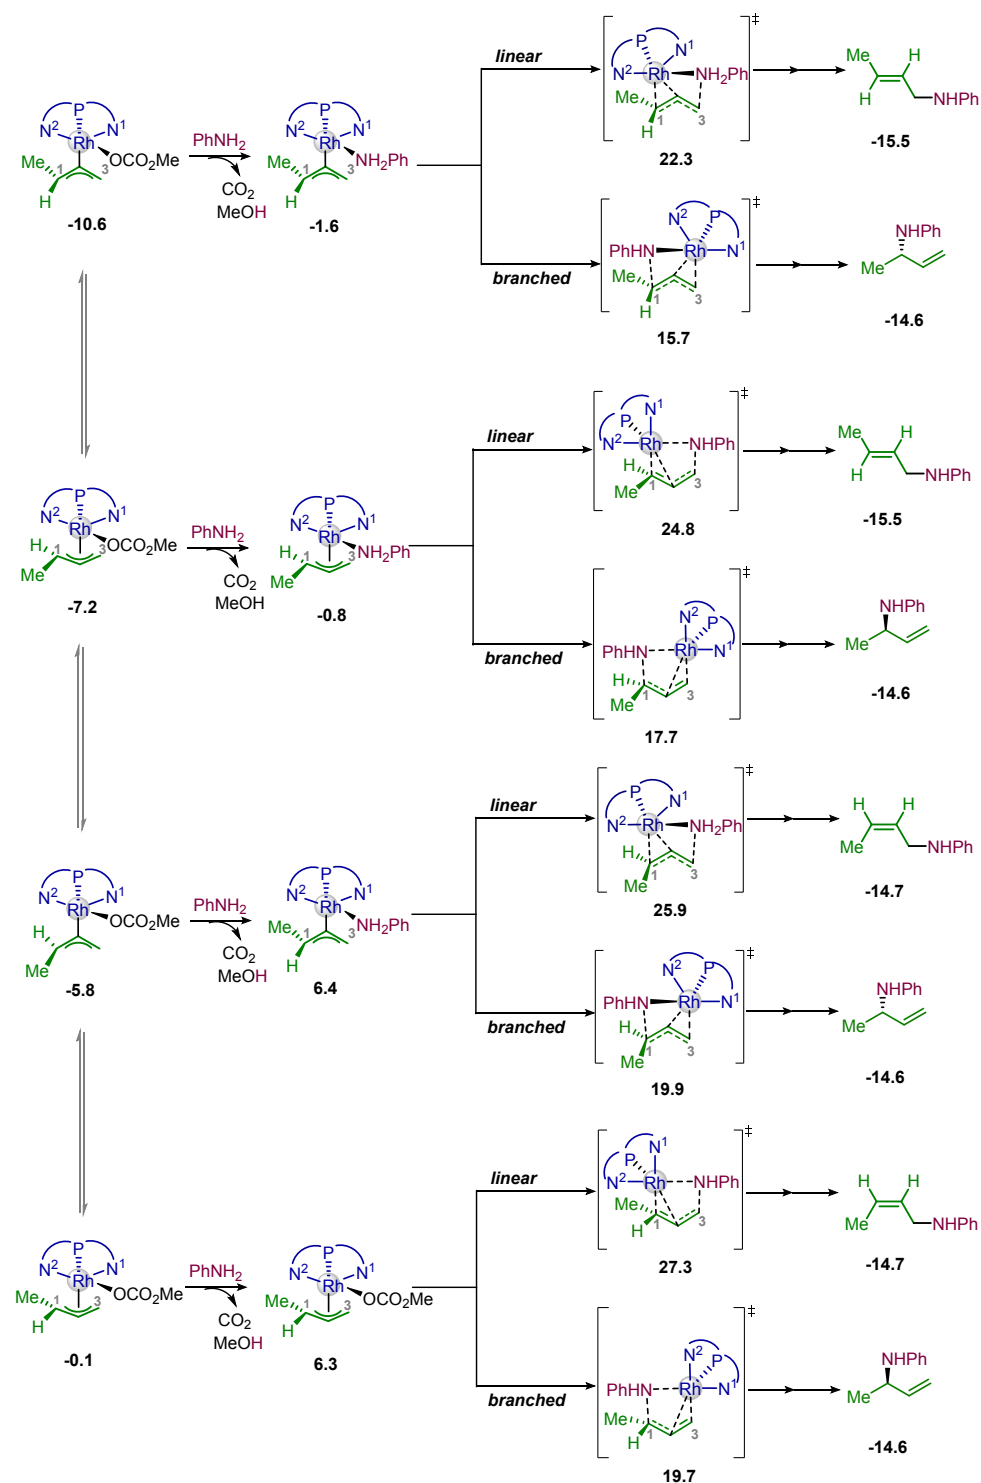

**Scheme S7.** C-N bond formation via the deprotonation/C-N reductive elimination. Energies are given in kcal/mol.



## 7. AIM analysis

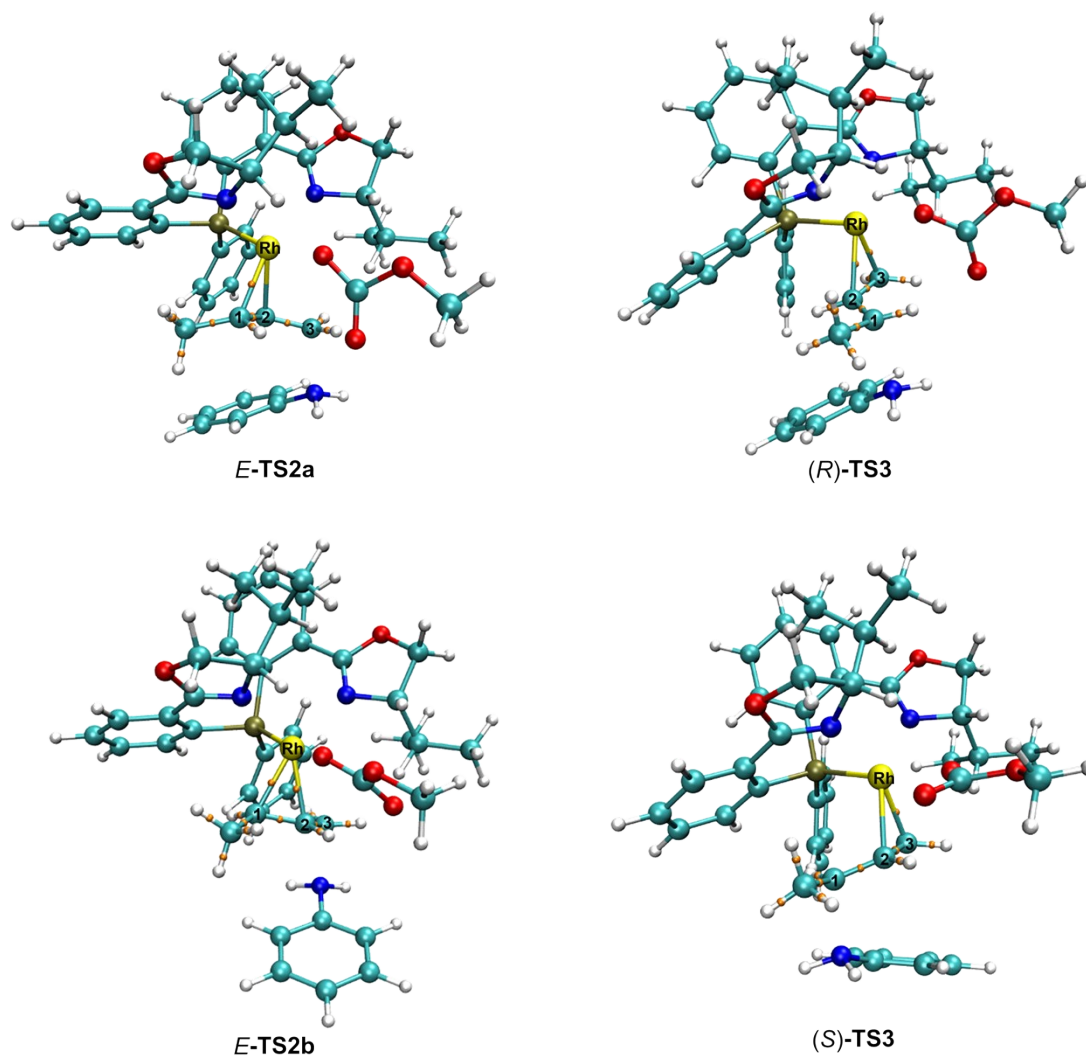

**Figure S1.** AIM analysis of the outer-sphere nucleophilic attack transition states.

## 8. Table of calculated energies and energy corrections

| Stationary point  | Single-point energy-<br>B3LYPP-D3(BJ)<br>6-311+G(d,p), SDD<br>(a.u.) | Thermal<br>correction to<br>Gibbs free<br>energy at<br>298.15 K<br>(a.u.) |
|-------------------|----------------------------------------------------------------------|---------------------------------------------------------------------------|
| ( <i>R</i> )-1a   | -460.4945574                                                         | 0.120277                                                                  |
| ( <i>S</i> )-1a   | -460.4945619                                                         | 0.120322                                                                  |
| cod               | -312.1607657                                                         | 0.148958                                                                  |
| PhNH <sub>2</sub> | -287.7244832                                                         | 0.088047                                                                  |
| <b>IM0</b>        | -2187.7106286                                                        | 0.684671                                                                  |
| <b>IM1a-exo</b>   | -2336.0218054                                                        | 0.655746                                                                  |
| <b>IM1a-endo</b>  | -2336.03240170                                                       | 0.653115                                                                  |
| <b>IM1b-exo</b>   | -2336.0289003                                                        | 0.654079                                                                  |
| <b>IM1b-endo</b>  | -2336.0289003                                                        | 0.654079                                                                  |
| <b>TS1a-exo</b>   | -2336.0028738                                                        | 0.650666                                                                  |
| <b>TS1a-endo</b>  | -2336.01722402                                                       | 0.649988                                                                  |
| <b>TS1b-exo</b>   | -2336.0143074                                                        | 0.651910                                                                  |
| <b>TS1b-endo</b>  | -2336.0175141                                                        | 0.652064                                                                  |
| <b>IM2a-exo</b>   | -2336.0459382                                                        | 0.657395                                                                  |
| <b>IM2a-endo</b>  | -2336.0549898                                                        | 0.657250                                                                  |
| <b>IM2b-exo</b>   | -2336.0578962                                                        | 0.657073                                                                  |
| <b>IM2b-endo</b>  | -2336.0549898                                                        | 0.657250                                                                  |
| <b>TS-iso-1</b>   | -2336.0373402                                                        | 0.654078                                                                  |
| <b>IM-iso-1</b>   | -2336.0471273                                                        | 0.654007                                                                  |
| <b>IM-iso-2</b>   | -2336.0448234                                                        | 0.654304                                                                  |
| <b>TS-iso-2</b>   | -2336.034491                                                         | 0.654521                                                                  |
| <i>E</i> -TS2a    | -2623.7638285                                                        | 0.765241                                                                  |
| ( <i>R</i> )-TS3  | -2623.7754207                                                        | 0.765256                                                                  |
| <i>E</i> -TS2b    | -2623.7632460                                                        | 0.764321                                                                  |
| ( <i>S</i> )-TS3  | -2623.7716371                                                        | 0.766019                                                                  |
| <i>E</i> -IM3a    | -2623.7753414                                                        | 0.767567                                                                  |
| ( <i>R</i> )-IM4  | -2623.7849569                                                        | 0.770263                                                                  |
| <i>E</i> -IM3b    | -2623.7742245                                                        | 0.769107                                                                  |
| ( <i>S</i> )-IM4  | -2623.7814454                                                        | 0.770659                                                                  |
| <i>E</i> -3a      | -443.8019888                                                         | 0.169920                                                                  |

|                   |               |          |
|-------------------|---------------|----------|
| <b>(R)-2a</b>     | -443.8005761  | 0.170007 |
| <b>(S)-2a</b>     | -443.8005761  | 0.170007 |
| <b>IM2a'-endo</b> | -2336.0406299 | 0.659433 |
| <b>TS4a-endo</b>  | -2336.0346923 | 0.655806 |
| <b>IM5a-endo</b>  | -2147.3845741 | 0.647669 |
| <b>E-TS5a</b>     | -2435.0843362 | 0.754762 |
| <b>(R)-TS6</b>    | -2435.0925796 | 0.753781 |

## 9. Cartesian coordinates

### (R)-1a

|   |             |            |             |
|---|-------------|------------|-------------|
| C | -0.16152000 | 2.84378900 | 0.29621700  |
| H | 0.17071100  | 1.83555100 | 0.06385200  |
| H | -0.61944700 | 2.99920400 | 1.27040900  |
| C | -0.01040900 | 3.84618800 | -0.56794400 |
| H | 0.44761800  | 3.67904600 | -1.54267300 |
| C | -0.41044300 | 5.26433000 | -0.28047900 |
| H | -0.89348700 | 5.33626200 | 0.69559500  |
| C | 0.75693200  | 6.23417600 | -0.37396500 |
| H | 1.23123100  | 6.17711800 | -1.35865100 |
| H | 1.50220100  | 5.98206600 | 0.38573600  |
| O | -1.36149800 | 5.71437900 | -1.30795200 |
| C | -2.64488900 | 5.34055500 | -1.26512800 |
| O | -3.41644700 | 5.61588900 | -2.16032400 |
| O | -2.96342000 | 4.66978100 | -0.14857800 |
| C | -4.33694600 | 4.24303300 | -0.06130900 |
| H | -4.58511800 | 3.58194300 | -0.89464400 |
| H | -4.41415500 | 3.70602800 | 0.88381000  |
| H | -5.00719200 | 5.10559700 | -0.06387600 |
| H | 0.41718400  | 7.26021500 | -0.20498100 |

### (S)-1a

|   |             |            |             |
|---|-------------|------------|-------------|
| C | -0.16408800 | 2.84744200 | -1.04117000 |
| H | 0.16407000  | 1.83781300 | -0.80905500 |
| H | -0.61688400 | 3.00588600 | -2.01728000 |
| C | -0.01434200 | 3.84789300 | -0.17450900 |
| H | 0.43840400  | 3.67775400 | 0.80215900  |
| C | -0.40899100 | 5.26763800 | -0.46158000 |
| C | 0.76064200  | 6.23403300 | -0.36111400 |
| H | 1.50892800  | 5.98084800 | -1.11748900 |
| H | 1.22999100  | 6.17432200 | 0.62579800  |
| H | -0.88728400 | 5.34238700 | -1.43978600 |
| O | -1.36350800 | 5.71885500 | 0.56214400  |
| C | -2.64783400 | 5.34913000 | 0.51276700  |
| O | -3.42269800 | 5.62579100 | 1.40468600  |
| O | -2.96318700 | 4.68062500 | -0.60601900 |
| C | -4.33771000 | 4.25860000 | -0.70046900 |
| H | -4.41229500 | 3.72366700 | -1.64697400 |
| H | -4.59187200 | 3.59673600 | 0.13045400  |
| H | -5.00512300 | 5.12335700 | -0.69929700 |
| H | 0.42464600  | 7.26127200 | -0.53035200 |

### cod

|   |             |            |             |
|---|-------------|------------|-------------|
| C | -0.64207500 | 5.12498900 | -0.45324000 |
| H | -1.11942100 | 5.71116500 | 0.33241900  |

|   |             |            |             |
|---|-------------|------------|-------------|
| C | 0.74278300  | 4.62342000 | -0.11412100 |
| H | 1.41359800  | 4.69185300 | -0.97204700 |
| H | 1.16908600  | 5.28083900 | 0.65195800  |
| C | 0.75460900  | 3.18945300 | 0.45358700  |
| H | 1.78362600  | 2.93520600 | 0.75028500  |
| H | 0.18004600  | 3.18229900 | 1.39031600  |
| C | 0.21282700  | 2.08339700 | -0.41598300 |
| H | -0.00224600 | 1.16773600 | 0.13690200  |
| C | -0.03722100 | 2.05641300 | -1.73158500 |
| H | -0.45710500 | 1.13104300 | -2.12673700 |
| C | 0.14965800  | 3.15319400 | -2.75449200 |
| H | 0.23746800  | 2.69032800 | -3.74389300 |
| H | 1.08416100  | 3.69318300 | -2.59416000 |
| C | -1.03063500 | 4.14397600 | -2.81391500 |
| H | -1.93391100 | 3.59055600 | -3.10630900 |
| H | -0.85517300 | 4.85481000 | -3.63580400 |
| C | -1.36174800 | 4.91965100 | -1.56405400 |
| H | -2.35062600 | 5.37969500 | -1.59264900 |

PhNH<sub>2</sub>

|   |            |            |             |
|---|------------|------------|-------------|
| N | 0.73018900 | 6.30681300 | -1.67661900 |
| H | 0.23033000 | 6.57750800 | -0.83817800 |
| C | 2.10943700 | 6.49435700 | -1.61840200 |
| C | 2.97006800 | 5.75784500 | -2.45496300 |
| C | 2.66862200 | 7.46578800 | -0.76683700 |
| C | 4.34352000 | 5.99250500 | -2.43837100 |
| H | 2.54904500 | 5.00335200 | -3.11477100 |
| C | 4.04420300 | 7.69151000 | -0.75909200 |
| H | 2.01426200 | 8.03843700 | -0.11428000 |
| C | 4.89511500 | 6.95975200 | -1.59246100 |
| H | 4.98871000 | 5.41000700 | -3.09078900 |
| H | 4.45344700 | 8.44479000 | -0.09102200 |
| H | 5.96597300 | 7.13764600 | -1.58185100 |
| H | 0.44136400 | 5.39222900 | -2.00273000 |

**IMO**

|    |            |             |            |
|----|------------|-------------|------------|
| Rh | 4.89036300 | 12.52648100 | 3.96148700 |
| P  | 4.65857100 | 10.24521200 | 4.18949200 |
| O  | 1.30181200 | 10.37380500 | 1.05088000 |
| C  | 3.20750200 | 12.94335600 | 5.26162400 |
| H  | 2.95129300 | 12.02765400 | 5.79337000 |
| N  | 6.91174700 | 12.04273000 | 3.44091800 |
| O  | 8.75385200 | 11.10611800 | 2.58073800 |
| C  | 2.77996600 | 13.03407700 | 3.92764000 |
| H  | 2.26682400 | 12.16477800 | 3.53490400 |
| N  | 3.46082500 | 10.78952100 | 1.58461500 |

|   |             |             |            |
|---|-------------|-------------|------------|
| C | 2.49506700  | 14.32587500 | 3.17119100 |
| H | 2.10568800  | 15.07962700 | 3.86108800 |
| H | 1.69728400  | 14.13239500 | 2.44775000 |
| C | 3.72320000  | 14.87444400 | 2.41183100 |
| H | 3.76009300  | 14.42382500 | 1.41624500 |
| H | 3.61588000  | 15.95757300 | 2.25599700 |
| C | 4.30621000  | 15.23698100 | 5.46736100 |
| H | 3.60477900  | 15.92429200 | 4.98897400 |
| H | 4.85094600  | 15.82126100 | 6.21533700 |
| C | 5.29711000  | 14.71325100 | 4.44588200 |
| H | 6.33118100  | 14.71083200 | 4.77097900 |
| C | 5.04089700  | 14.57747100 | 3.09063300 |
| H | 5.89287200  | 14.48976900 | 2.41805600 |
| C | 3.54707300  | 14.09913400 | 6.17564900 |
| H | 4.16765000  | 13.70872400 | 6.98995800 |
| H | 2.63155700  | 14.48786600 | 6.64589000 |
| C | 5.46172600  | 9.71769000  | 5.75878400 |
| C | 5.51023000  | 10.63367500 | 6.82052700 |
| H | 5.07431700  | 11.61783100 | 6.69352100 |
| C | 6.72791000  | 9.03658300  | 8.16603800 |
| H | 7.22385000  | 8.77358300  | 9.09558100 |
| C | 6.13464700  | 10.29239900 | 8.02015600 |
| H | 6.16945400  | 11.01144100 | 8.83320600 |
| C | 6.05602800  | 8.45662200  | 5.91351600 |
| H | 6.02989900  | 7.73700700  | 5.10257700 |
| C | 6.68812800  | 8.12110100  | 7.11149000 |
| H | 7.14980200  | 7.14429900  | 7.22016300 |
| C | 5.59710300  | 9.27375300  | 2.94891800 |
| C | 5.85542500  | 7.23557000  | 1.64650000 |
| H | 5.47234000  | 6.26336300  | 1.35269300 |
| C | 5.13635300  | 8.01451600  | 2.55353500 |
| H | 4.20404000  | 7.63537800  | 2.95514800 |
| C | 7.53545100  | 8.95466300  | 1.51297600 |
| H | 8.46922000  | 9.32622900  | 1.11035800 |
| C | 7.05637600  | 7.70926000  | 1.12024300 |
| H | 7.61869000  | 7.11476300  | 0.40786500 |
| C | 6.82165200  | 9.74625000  | 2.42928000 |
| C | 7.43708900  | 11.01710900 | 2.84300200 |
| C | 9.16624700  | 12.46127600 | 2.92326400 |
| H | 9.24534300  | 13.02875500 | 1.99210900 |
| H | 10.14023300 | 12.40090300 | 3.40697000 |
| C | 8.02854800  | 12.95290000 | 3.82113900 |
| H | 7.76384400  | 13.97724100 | 3.56178200 |
| C | 8.29961500  | 12.86753800 | 5.33950500 |

|                 |             |             |             |
|-----------------|-------------|-------------|-------------|
| H               | 7.32996400  | 13.03379600 | 5.82417900  |
| C               | 8.81734700  | 11.49645700 | 5.78732900  |
| H               | 8.14647100  | 10.68718200 | 5.48799200  |
| H               | 8.89531800  | 11.46769000 | 6.87824400  |
| H               | 9.81369900  | 11.28991900 | 5.38180000  |
| C               | 9.24986600  | 13.99301800 | 5.76012200  |
| H               | 10.22919000 | 13.88724100 | 5.27885900  |
| H               | 9.40984200  | 13.97643700 | 6.84289500  |
| H               | 8.84659800  | 14.97547200 | 5.49041300  |
| C               | 2.99519400  | 9.46031200  | 4.23869400  |
| C               | 2.60708700  | 8.80478900  | 5.41512500  |
| H               | 3.29843100  | 8.74134700  | 6.24589300  |
| C               | 1.34621700  | 8.22066900  | 5.54190400  |
| H               | 1.07959600  | 7.71840400  | 6.46652600  |
| C               | 0.44346500  | 8.27919000  | 4.48290300  |
| H               | -0.53764800 | 7.82322500  | 4.56833200  |
| C               | 0.80452100  | 8.93171500  | 3.30751900  |
| H               | 0.10664100  | 8.98787700  | 2.48114100  |
| C               | 2.06535600  | 9.53108900  | 3.16741000  |
| C               | 2.35211500  | 10.24236100 | 1.91192200  |
| C               | 1.83740700  | 11.03502300 | -0.12993900 |
| H               | 1.15945200  | 11.84469400 | -0.40189700 |
| H               | 1.87569800  | 10.30180500 | -0.94130400 |
| C               | 3.23145300  | 11.51984300 | 0.32052400  |
| H               | 3.18748900  | 12.58642100 | 0.57198400  |
| C               | 4.36006000  | 11.32668600 | -0.70525400 |
| H               | 3.99472000  | 11.76281800 | -1.64564400 |
| C               | 4.68331600  | 9.84951900  | -0.94559700 |
| H               | 3.80425800  | 9.28194600  | -1.26879100 |
| H               | 5.06369500  | 9.38498000  | -0.03357700 |
| H               | 5.44813800  | 9.74595300  | -1.72236500 |
| C               | 5.60534600  | 12.10710200 | -0.26946500 |
| H               | 6.42586200  | 11.97009300 | -0.98196100 |
| H               | 5.94928200  | 11.76845300 | 0.71101300  |
| H               | 5.39394600  | 13.17976600 | -0.19751300 |
| <b>IM1a-exo</b> |             |             |             |
| Rh              | 9.86639400  | 5.16304200  | 25.05805400 |
| C               | 10.40729700 | 6.62761300  | 28.17505100 |
| O               | 9.01031400  | 0.96985000  | 25.91681500 |
| N               | 9.86090100  | 2.95630900  | 25.31564300 |
| P               | 10.18567500 | 5.09727800  | 27.20341000 |
| N               | 12.02375700 | 5.44784500  | 24.88704000 |
| O               | 14.24657900 | 5.29872000  | 25.12289600 |
| C               | 10.69784100 | 6.58179400  | 29.54970500 |

|   |             |             |             |
|---|-------------|-------------|-------------|
| H | 10.74553100 | 5.63262700  | 30.07193900 |
| C | 10.93512600 | 7.76233200  | 30.25026400 |
| H | 11.15149100 | 7.72049500  | 31.31324600 |
| C | 7.22372600  | 3.69074700  | 29.70835500 |
| H | 6.69171300  | 4.05512200  | 30.58121600 |
| C | 8.19643400  | 4.49418400  | 29.11001400 |
| H | 8.40446100  | 5.46940500  | 29.53124500 |
| C | 8.89817800  | 4.05734700  | 27.98364800 |
| C | 10.39704000 | 7.86064200  | 27.51100600 |
| H | 10.21871200 | 7.88869400  | 26.44435500 |
| C | 10.64363400 | 9.03937100  | 28.21701100 |
| H | 10.63866100 | 9.98969700  | 27.69223600 |
| C | 10.90473700 | 8.99262100  | 29.58656600 |
| H | 11.09621300 | 9.90955300  | 30.13568600 |
| C | 6.94568500  | 2.42966300  | 29.18744100 |
| H | 6.19510500  | 1.79702000  | 29.64963700 |
| C | 7.62336100  | 1.98324500  | 28.05496400 |
| H | 7.39407600  | 1.01259400  | 27.63243300 |
| C | 9.20018000  | 2.27819500  | 26.19246400 |
| C | 8.58933400  | 2.78502200  | 27.43106700 |
| C | 9.46365200  | 0.76894700  | 24.54310600 |
| H | 8.57550200  | 0.68765400  | 23.91118200 |
| H | 10.02638800 | -0.16327900 | 24.51130800 |
| C | 11.82400300 | 1.83352100  | 24.24866800 |
| H | 12.25594400 | 2.83963900  | 24.21099900 |
| C | 10.29466000 | 2.03223900  | 24.24142400 |
| H | 10.00485900 | 2.46533500  | 23.28030500 |
| C | 12.32975200 | 1.13724900  | 25.51621400 |
| H | 12.00851000 | 0.09043500  | 25.55278600 |
| H | 11.97944500 | 1.63493800  | 26.42314600 |
| H | 13.42353800 | 1.14321500  | 25.53679400 |
| C | 11.73593100 | 4.17572000  | 27.60922200 |
| C | 12.25811000 | 1.07916600  | 22.98734300 |
| H | 11.94440400 | 1.60600000  | 22.07921700 |
| H | 11.82726000 | 0.07134100  | 22.95816800 |
| H | 13.34740800 | 0.97334900  | 22.95906900 |
| C | 11.74092700 | 3.38046100  | 28.76139300 |
| H | 10.83316400 | 3.26704000  | 29.34184900 |
| C | 12.90017300 | 2.72906200  | 29.18604100 |
| H | 12.87235800 | 2.11717300  | 30.08203200 |
| C | 14.08285900 | 2.86995100  | 28.46343100 |
| H | 14.98902500 | 2.36802300  | 28.78622000 |
| C | 14.09619800 | 3.65069900  | 27.31150900 |
| H | 15.00547600 | 3.74771900  | 26.73099700 |



|   |             |            |             |
|---|-------------|------------|-------------|
| C | 12.93407400 | 4.30046300 | 26.86747800 |
| C | 13.01190200 | 5.04307000 | 25.60674300 |
| C | 14.05457200 | 5.80945500 | 23.76775200 |
| H | 14.28143500 | 4.99642400 | 23.07292800 |
| H | 14.75452200 | 6.63076900 | 23.61951200 |
| C | 12.56974500 | 6.21500700 | 23.74146900 |
| H | 12.08449300 | 5.86683100 | 22.82591400 |
| C | 12.29881700 | 7.72617700 | 23.90332000 |
| H | 11.21807500 | 7.81802200 | 24.05807500 |
| C | 12.66669900 | 8.46638300 | 22.61317700 |
| H | 12.12335900 | 8.06124700 | 21.75216900 |
| H | 13.73965100 | 8.39129200 | 22.40022300 |
| H | 12.42163700 | 9.53003400 | 22.69816700 |
| C | 13.00665300 | 8.33311500 | 25.11914500 |
| H | 14.09517300 | 8.33303200 | 24.99433400 |
| H | 12.76664500 | 7.79647000 | 26.04070600 |
| H | 12.69290800 | 9.37320600 | 25.25459500 |
| C | 8.67021800  | 6.83439200 | 24.59924000 |
| C | 7.84177200  | 5.66746100 | 24.77758900 |
| C | 6.78543500  | 5.53485700 | 25.85066800 |
| C | 6.74477200  | 6.64182000 | 26.89235000 |
| H | 5.99992400  | 6.40902000 | 27.65708900 |
| H | 6.48403000  | 7.59423500 | 26.42208800 |
| H | 7.71106200  | 6.76148100 | 27.38357800 |
| O | 5.48935000  | 5.55177800 | 25.13822400 |
| C | 4.49477300  | 4.87005600 | 25.70982800 |
| O | 4.55176900  | 4.21686400 | 26.73485800 |
| O | 3.40023300  | 5.02044700 | 24.94926000 |
| C | 2.22954800  | 4.33367700 | 25.43147500 |
| H | 1.95161600  | 4.69497500 | 26.42461400 |
| H | 1.44189600  | 4.56239900 | 24.71375500 |
| H | 2.40297800  | 3.25543600 | 25.47040100 |
| H | 6.84625200  | 4.55980400 | 26.33476300 |
| H | 8.92427600  | 7.14684700 | 23.58388000 |
| H | 8.57855000  | 7.66696300 | 25.28941800 |
| H | 7.55607800  | 5.11071200 | 23.88068700 |

**IM1a-endo**

|    |             |            |             |
|----|-------------|------------|-------------|
| Rh | 10.28290400 | 4.96603100 | 25.39904700 |
| C  | 11.39717700 | 6.91207300 | 27.97699500 |
| O  | 9.32449800  | 1.07860100 | 27.09650200 |
| N  | 10.14501900 | 2.84788200 | 25.99040800 |
| P  | 11.08930800 | 5.21725900 | 27.38583600 |
| N  | 12.31935400 | 4.88031100 | 24.57870400 |
| O  | 14.55261500 | 4.74888300 | 24.41219900 |

|   |             |             |             |
|---|-------------|-------------|-------------|
| C | 12.70776000 | 7.40204900  | 28.07232900 |
| H | 13.55247200 | 6.75167800  | 27.87692200 |
| C | 12.93147200 | 8.73496400  | 28.42131000 |
| H | 13.94927700 | 9.10543300  | 28.49461600 |
| C | 8.94136100  | 4.38475900  | 30.80406800 |
| H | 8.75463700  | 4.88178900  | 31.75064800 |
| C | 9.74959400  | 5.00394800  | 29.84846600 |
| H | 10.18927600 | 5.96700500  | 30.07519900 |
| C | 10.00785800 | 4.39435100  | 28.61655800 |
| C | 10.31524200 | 7.77310300  | 28.23077100 |
| H | 9.29704300  | 7.40651900  | 28.16076900 |
| C | 10.54659000 | 9.10001300  | 28.58643700 |
| H | 9.70528700  | 9.75540800  | 28.78932200 |
| C | 11.85460600 | 9.58418500  | 28.67905200 |
| H | 12.03184200 | 10.61978300 | 28.95274400 |
| C | 8.38682700  | 3.13449100  | 30.54124600 |
| H | 7.75704900  | 2.64586100  | 31.27744800 |
| C | 8.64612500  | 2.50451100  | 29.32634800 |
| H | 8.22193300  | 1.52966100  | 29.11947300 |
| C | 9.66998600  | 2.38439400  | 27.09652100 |
| C | 9.44760500  | 3.11740200  | 28.35205000 |
| C | 9.43275600  | 0.62369300  | 25.71291500 |
| H | 8.41978500  | 0.54898700  | 25.30946300 |
| H | 9.90024800  | -0.36033800 | 25.72228600 |
| C | 11.74535200 | 1.37251700  | 24.77468900 |
| H | 12.21809600 | 2.30282800  | 24.44417700 |
| C | 10.26534100 | 1.72578400  | 25.03025500 |
| H | 9.80889900  | 2.02775800  | 24.08384000 |
| C | 12.46991500 | 0.88839400  | 26.03514000 |
| H | 12.08554600 | -0.08081700 | 26.37279200 |
| H | 12.37599100 | 1.60062500  | 26.85880000 |
| H | 13.53705600 | 0.76216600  | 25.82844400 |
| C | 12.69705200 | 4.34592100  | 27.58625000 |
| C | 11.85364700 | 0.35038100  | 23.63854700 |
| H | 11.37166600 | 0.71642900  | 22.72503400 |
| H | 11.38222100 | -0.60121700 | 23.91068500 |
| H | 12.90389200 | 0.14383600  | 23.40820700 |
| C | 12.99800600 | 3.85078300  | 28.86181600 |
| H | 12.28269500 | 3.97038200  | 29.66679700 |
| C | 14.20676600 | 3.20625900  | 29.12232000 |
| H | 14.40959100 | 2.82889100  | 30.11944800 |
| C | 15.14430500 | 3.05396400  | 28.10292000 |
| H | 16.08730500 | 2.55166500  | 28.29239600 |
| C | 14.86644800 | 3.54563700  | 26.83150500 |

|   |             |            |             |
|---|-------------|------------|-------------|
| H | 15.58800600 | 3.42219300 | 26.03364200 |
| C | 13.64836800 | 4.18654900 | 26.55110000 |
| C | 13.43716000 | 4.63027500 | 25.16573500 |
| C | 14.10788100 | 4.98923400 | 23.04557600 |
| H | 14.27925500 | 4.07325000 | 22.47472900 |
| H | 14.71610400 | 5.79650100 | 22.63845400 |
| C | 12.61040400 | 5.32811000 | 23.19484200 |
| H | 12.00882200 | 4.73016300 | 22.50435900 |
| C | 12.25039800 | 6.81461800 | 22.99300600 |
| H | 11.17427200 | 6.88615800 | 23.17662300 |
| C | 12.51517800 | 7.23270000 | 21.54302900 |
| H | 11.99891100 | 6.57246500 | 20.83694400 |
| H | 13.58450400 | 7.21165800 | 21.30385000 |
| H | 12.16038100 | 8.25403000 | 21.37128500 |
| C | 12.95772200 | 7.73452100 | 23.99238200 |
| H | 14.04728700 | 7.70024200 | 23.87558000 |
| H | 12.71433400 | 7.46534900 | 25.02438900 |
| H | 12.64487000 | 8.77210900 | 23.83575700 |
| C | 9.33146200  | 6.80436200 | 25.13122200 |
| H | 9.69677400  | 7.66232900 | 25.69018900 |
| H | 9.19256300  | 7.01059300 | 24.06983300 |
| C | 8.43298500  | 5.86870800 | 25.77284500 |
| H | 8.15491700  | 6.03814600 | 26.81348300 |
| C | 7.38092500  | 5.14532500 | 24.97203200 |
| C | 6.61393000  | 4.10521800 | 25.76769200 |
| H | 5.84138600  | 3.63535200 | 25.15249500 |
| H | 6.13859300  | 4.55731100 | 26.64441100 |
| H | 7.30166900  | 3.32975600 | 26.11292600 |
| O | 6.36947400  | 6.11060600 | 24.48178400 |
| C | 6.52891400  | 6.56559000 | 23.23988200 |
| O | 7.36919100  | 6.21552400 | 22.42916300 |
| O | 5.58345300  | 7.48836800 | 23.01362500 |
| C | 5.61026300  | 8.07919800 | 21.70000500 |
| H | 5.46032800  | 7.31823600 | 20.93038700 |
| H | 4.78794600  | 8.79448000 | 21.68709400 |
| H | 6.55963000  | 8.59218100 | 21.52757400 |
| H | 7.82495600  | 4.69554800 | 24.07958300 |

**IM1b-exo**

|    |             |            |             |
|----|-------------|------------|-------------|
| Rh | 9.91836800  | 5.08773900 | 24.83370300 |
| C  | 10.08391500 | 6.85859600 | 27.77742900 |
| O  | 8.97259600  | 0.96625900 | 25.96802300 |
| N  | 9.86498800  | 2.89543600 | 25.25357500 |
| P  | 10.07118800 | 5.20999500 | 26.99699300 |
| N  | 12.08312100 | 5.26677400 | 24.75324900 |

|   |             |             |             |
|---|-------------|-------------|-------------|
| O | 14.28130900 | 5.15275000  | 25.17424900 |
| C | 11.29289800 | 7.39088700  | 28.25247500 |
| H | 12.19905500 | 6.79712600  | 28.23624600 |
| C | 11.33662700 | 8.69257800  | 28.75337500 |
| H | 12.27707500 | 9.09308500  | 29.11901200 |
| C | 7.09387600  | 3.90350300  | 29.53140300 |
| H | 6.56136400  | 4.30425300  | 30.38786400 |
| C | 8.06924200  | 4.67918300  | 28.90224700 |
| H | 8.28950400  | 5.66490700  | 29.29140400 |
| C | 8.76848400  | 4.19678100  | 27.79152000 |
| C | 8.92207800  | 7.64938100  | 27.80874600 |
| H | 7.97322700  | 7.26148000  | 27.46060000 |
| C | 8.97278300  | 8.94492000  | 28.32007100 |
| H | 8.06528200  | 9.54031300  | 28.35039700 |
| C | 10.17906800 | 9.47145100  | 28.78897400 |
| H | 10.21547500 | 10.48276900 | 29.18235200 |
| C | 6.81720900  | 2.62120800  | 29.06368300 |
| H | 6.06203900  | 2.01015000  | 29.54704200 |
| C | 7.51538900  | 2.11798100  | 27.96863700 |
| H | 7.30197700  | 1.12159600  | 27.60184200 |
| C | 9.15251600  | 2.29370000  | 26.14457300 |
| C | 8.48719700  | 2.88934400  | 27.31493900 |
| C | 9.50535500  | 0.65057000  | 24.64606800 |
| H | 8.65581900  | 0.52424800  | 23.96990500 |
| H | 10.05744400 | -0.28531700 | 24.72447100 |
| C | 11.88817700 | 1.68621400  | 24.43099800 |
| H | 12.32521800 | 2.68423200  | 24.31917200 |
| C | 10.36403900 | 1.88108100  | 24.29508500 |
| H | 10.14714300 | 2.22814200  | 23.28138600 |
| C | 12.29993900 | 1.12935400  | 25.79797100 |
| H | 11.97010700 | 0.09199700  | 25.92351600 |
| H | 11.89155100 | 1.72141400  | 26.62076800 |
| H | 13.38984300 | 1.13888900  | 25.89427500 |
| C | 11.61176800 | 4.40878700  | 27.62410800 |
| C | 12.40846000 | 0.80750800  | 23.28839000 |
| H | 12.15680700 | 1.23445600  | 22.31108000 |
| H | 11.98319000 | -0.20203000 | 23.33481000 |
| H | 13.49745800 | 0.70961400  | 23.34500000 |
| C | 11.55197600 | 3.82561900  | 28.89631100 |
| H | 10.62113200 | 3.83607100  | 29.45004000 |
| C | 12.67396300 | 3.23200600  | 29.47477300 |
| H | 12.59465500 | 2.78422400  | 30.46015600 |
| C | 13.88624500 | 3.22054300  | 28.78792100 |
| H | 14.76436700 | 2.75906300  | 29.22750600 |

|                  |             |            |             |
|------------------|-------------|------------|-------------|
| C                | 13.96837000 | 3.80328300 | 27.52751900 |
| H                | 14.90469400 | 3.79224800 | 26.98357800 |
| C                | 12.84331400 | 4.39431300 | 26.93078200 |
| C                | 13.01153700 | 4.95811300 | 25.58896200 |
| C                | 14.20298600 | 5.51816000 | 23.76414600 |
| H                | 14.51552900 | 4.64971100 | 23.17859000 |
| H                | 14.89400900 | 6.34400000 | 23.59879600 |
| C                | 12.71719300 | 5.87247300 | 23.55631600 |
| H                | 12.32220300 | 5.37814600 | 22.66456100 |
| C                | 12.40893300 | 7.38181200 | 23.46085200 |
| H                | 11.31932400 | 7.45922700 | 23.39749700 |
| C                | 13.00313300 | 7.96413300 | 22.17398100 |
| H                | 12.66742000 | 7.40709600 | 21.29193300 |
| H                | 14.09900200 | 7.94508600 | 22.18753500 |
| H                | 12.69500000 | 9.00746200 | 22.05143500 |
| C                | 12.86198300 | 8.15737900 | 24.70108000 |
| H                | 13.94842800 | 8.10855500 | 24.83766900 |
| H                | 12.38375400 | 7.77565200 | 25.60772700 |
| H                | 12.59151400 | 9.21395100 | 24.60391100 |
| C                | 8.85736300  | 6.83928200 | 24.41344600 |
| C                | 7.96184800  | 5.70388500 | 24.41053300 |
| C                | 6.80856600  | 5.55590700 | 25.36235600 |
| C                | 6.03575200  | 4.25928300 | 25.18930500 |
| H                | 5.22945700  | 4.18465800 | 25.92480400 |
| H                | 6.70250900  | 3.40467800 | 25.32114800 |
| H                | 5.60293500  | 4.20547900 | 24.18487700 |
| O                | 5.85758800  | 6.66287900 | 25.09147200 |
| C                | 5.41212000  | 7.34494800 | 26.14268900 |
| O                | 5.67856100  | 7.14394400 | 27.31617900 |
| O                | 4.60478200  | 8.31798800 | 25.69875100 |
| C                | 4.05033200  | 9.16228700 | 26.72635900 |
| H                | 4.84535900  | 9.67492600 | 27.27360400 |
| H                | 3.42665400  | 9.88611000 | 26.20199700 |
| H                | 3.44574500  | 8.57683900 | 27.42320000 |
| H                | 7.11619300  | 5.67128300 | 26.39774400 |
| H                | 9.14998900  | 7.27022600 | 23.45444500 |
| H                | 8.78141400  | 7.58211000 | 25.20531400 |
| H                | 7.73640300  | 5.28031300 | 23.42451900 |
| <b>IM1b-endo</b> |             |            |             |
| Rh               | 9.75259300  | 5.55956600 | 25.45609400 |
| C                | 11.01917300 | 7.50032900 | 27.98056400 |
| O                | 9.14865500  | 1.59662500 | 27.13106200 |
| N                | 9.79811500  | 3.42690000 | 26.01057800 |
| P                | 10.72367300 | 5.80982900 | 27.37272500 |

|   |             |             |             |
|---|-------------|-------------|-------------|
| N | 11.70397300 | 5.64702500  | 24.47112100 |
| O | 13.92013900 | 5.67502600  | 24.11584100 |
| C | 12.31744700 | 8.03023700  | 27.99182800 |
| H | 13.16422900 | 7.41247300  | 27.71607400 |
| C | 12.52595800 | 9.36026200  | 28.36025500 |
| H | 13.53459400 | 9.76166500  | 28.36788000 |
| C | 8.90279800  | 4.80971100  | 30.93346500 |
| H | 8.77012100  | 5.27916500  | 31.90294500 |
| C | 9.60167500  | 5.48517000  | 29.93080800 |
| H | 10.01303100 | 6.46406900  | 30.14298200 |
| C | 9.78785000  | 4.91220000  | 28.66910500 |
| C | 9.93320000  | 8.31803500  | 28.33935900 |
| H | 8.92449700  | 7.91977900  | 28.33854000 |
| C | 10.15013600 | 9.64239000  | 28.71323300 |
| H | 9.30688000  | 10.26429000 | 28.99725100 |
| C | 11.44593200 | 10.16676700 | 28.72110400 |
| H | 11.61140300 | 11.20028100 | 29.00962400 |
| C | 8.38696500  | 3.53983900  | 30.68718300 |
| H | 7.84208000  | 3.00774500  | 31.46004900 |
| C | 8.57635300  | 2.94606200  | 29.44146700 |
| H | 8.18297500  | 1.95572100  | 29.24713500 |
| C | 9.42697600  | 2.91804800  | 27.13630700 |
| C | 9.26722600  | 3.61511700  | 28.42098000 |
| C | 9.17586000  | 1.17534800  | 25.73297200 |
| H | 8.14041400  | 1.05733400  | 25.40331200 |
| H | 9.69080500  | 0.21645500  | 25.68487200 |
| C | 11.36945100 | 2.05993900  | 24.63756900 |
| H | 11.77184700 | 3.02256700  | 24.30549300 |
| C | 9.89920000  | 2.33212400  | 25.01705100 |
| H | 9.35621200  | 2.63064800  | 24.11651200 |
| C | 12.21127000 | 1.56979700  | 25.82014600 |
| H | 11.89923400 | 0.57204300  | 26.14851700 |
| H | 12.14799200 | 2.24793200  | 26.67474800 |
| H | 13.26380900 | 1.50327700  | 25.52869300 |
| C | 12.37373200 | 4.99780900  | 27.39885200 |
| C | 11.43384200 | 1.08236500  | 23.45936100 |
| H | 10.87097500 | 1.45898500  | 22.59787300 |
| H | 11.02106100 | 0.10325000  | 23.72923600 |
| H | 12.47112700 | 0.92789800  | 23.14499600 |
| C | 12.80566500 | 4.45750800  | 28.61711800 |
| H | 12.16265300 | 4.51135100  | 29.48758600 |
| C | 14.05525300 | 3.84975100  | 28.73653500 |
| H | 14.36109900 | 3.43528500  | 29.69174400 |
| C | 14.90192500 | 3.78160600  | 27.63201100 |

|                 |             |            |             |
|-----------------|-------------|------------|-------------|
| H               | 15.87529500 | 3.30893700 | 27.71255700 |
| C               | 14.49384200 | 4.32078100 | 26.41612900 |
| H               | 15.14405700 | 4.26428500 | 25.55189500 |
| C               | 13.23350600 | 4.92428800 | 26.27814000 |
| C               | 12.88153300 | 5.43307900 | 24.94568900 |
| C               | 13.34624600 | 5.98125700 | 22.81131400 |
| H               | 13.51855700 | 5.11957600 | 22.16138800 |
| H               | 13.87041300 | 6.85089900 | 22.41613600 |
| C               | 11.85151900 | 6.21633300 | 23.10882300 |
| H               | 11.22524800 | 5.64057400 | 22.42166800 |
| C               | 11.39823000 | 7.69087600 | 23.06275000 |
| H               | 10.34020900 | 7.68414300 | 23.34058000 |
| C               | 11.51085700 | 8.23797300 | 21.63595400 |
| H               | 10.96339100 | 7.61003300 | 20.92386800 |
| H               | 12.55336700 | 8.29436900 | 21.30222800 |
| H               | 11.09462500 | 9.24920400 | 21.58325900 |
| C               | 12.14143100 | 8.56854600 | 24.07398500 |
| H               | 13.21706400 | 8.60760600 | 23.86544300 |
| H               | 12.00331600 | 8.20412700 | 25.09590800 |
| H               | 11.76275600 | 9.59514000 | 24.03246100 |
| C               | 8.62694500  | 7.32444200 | 25.33720300 |
| C               | 7.90570000  | 6.30883900 | 26.07077300 |
| H               | 7.78497100  | 6.44284800 | 27.14391100 |
| C               | 6.78867900  | 5.48845200 | 25.48016500 |
| C               | 6.87563500  | 5.26529700 | 23.98157800 |
| H               | 6.08205200  | 4.59462700 | 23.64120800 |
| H               | 6.80179400  | 6.20573900 | 23.42885000 |
| H               | 7.84345800  | 4.80255800 | 23.74592200 |
| O               | 5.45298900  | 5.37580500 | 27.85378700 |
| C               | 4.97985100  | 6.02075100 | 26.93575100 |
| O               | 5.48634600  | 6.15498200 | 25.70936100 |
| O               | 3.83775000  | 6.72125600 | 26.99339200 |
| C               | 3.15975900  | 6.67204100 | 28.26340700 |
| H               | 3.78980200  | 7.08784300 | 29.05361400 |
| H               | 2.26361500  | 7.27951100 | 28.13796400 |
| H               | 2.88672700  | 5.64466400 | 28.51645600 |
| H               | 6.73251100  | 4.52967500 | 26.00099800 |
| H               | 8.99355900  | 8.20186200 | 25.86503000 |
| H               | 8.35584300  | 7.53325200 | 24.30182200 |
| <b>TS1a-exo</b> |             |            |             |
| Rh              | 9.88320700  | 5.05221000 | 25.21112700 |
| C               | 10.63867500 | 6.68096300 | 28.17241700 |
| O               | 8.87107400  | 0.99202400 | 26.31870900 |
| N               | 9.83288200  | 2.88503800 | 25.61469000 |

|   |             |             |             |
|---|-------------|-------------|-------------|
| P | 10.37696500 | 5.08523900  | 27.34721100 |
| N | 11.91027800 | 5.47451400  | 24.94371900 |
| O | 14.13091400 | 5.26101100  | 24.90909700 |
| C | 11.84911600 | 6.95621200  | 28.82714000 |
| H | 12.63051100 | 6.20781600  | 28.87899200 |
| C | 12.05058200 | 8.20429700  | 29.41679600 |
| H | 12.98917000 | 8.41207200  | 29.92086400 |
| C | 7.68615600  | 3.90094000  | 30.21308500 |
| H | 7.30670400  | 4.30368300  | 31.14638800 |
| C | 8.63298500  | 4.62495100  | 29.48384300 |
| H | 8.98109400  | 5.57998600  | 29.85897600 |
| C | 9.13062500  | 4.13089200  | 28.27600300 |
| C | 9.63660100  | 7.66299200  | 28.11645500 |
| H | 8.69872900  | 7.45394500  | 27.61992200 |
| C | 9.84463700  | 8.90478800  | 28.71179800 |
| H | 9.06386300  | 9.65770100  | 28.66944500 |
| C | 11.05319100 | 9.17868700  | 29.35828700 |
| H | 11.21510400 | 10.14921300 | 29.81713100 |
| C | 7.23569400  | 2.67115800  | 29.74051200 |
| H | 6.49761800  | 2.10559200  | 30.29941000 |
| C | 7.73480900  | 2.15904400  | 28.54297900 |
| H | 7.38883500  | 1.20027200  | 28.17610300 |
| C | 9.16380200  | 2.28563600  | 26.53973900 |
| C | 8.67820900  | 2.87488700  | 27.79680100 |
| C | 9.25509800  | 0.70975900  | 24.93448900 |
| H | 8.33653500  | 0.65420100  | 24.34586900 |
| H | 9.76210700  | -0.25400000 | 24.92189300 |
| C | 11.65571000 | 1.62093900  | 24.46753400 |
| H | 12.14102200 | 2.59954400  | 24.37486000 |
| C | 10.14358700 | 1.90906500  | 24.54468200 |
| H | 9.82024300  | 2.33471300  | 23.59095900 |
| C | 12.19510200 | 0.93062700  | 25.72365700 |
| H | 11.80956100 | -0.09077700 | 25.81511800 |
| H | 11.93594400 | 1.47684000  | 26.63350700 |
| H | 13.28578600 | 0.86403600  | 25.67642000 |
| C | 11.92471100 | 4.14282000  | 27.63359300 |
| C | 11.96770400 | 0.81018700  | 23.20528200 |
| H | 11.63369600 | 1.33306500  | 22.30223500 |
| H | 11.47366700 | -0.16820600 | 23.23078300 |
| H | 13.04470700 | 0.63476000  | 23.11793600 |
| C | 12.03859200 | 3.38085200  | 28.80023200 |
| H | 11.21098200 | 3.33157800  | 29.49788300 |
| C | 13.21692300 | 2.68835300  | 29.08739500 |
| H | 13.28353900 | 2.10269000  | 29.99844900 |



|                  |             |            |             |
|------------------|-------------|------------|-------------|
| C                | 14.29810600 | 2.75253800 | 28.21052800 |
| H                | 15.21435600 | 2.21411800 | 28.42856900 |
| C                | 14.20004600 | 3.50729100 | 27.04448100 |
| H                | 15.03232700 | 3.55590700 | 26.35272800 |
| C                | 13.01977800 | 4.20054300 | 26.74446200 |
| C                | 12.96611600 | 4.98602100 | 25.51261800 |
| C                | 13.79383800 | 5.91177500 | 23.63983200 |
| H                | 13.86661700 | 5.15514800 | 22.85448200 |
| H                | 14.52355200 | 6.70182900 | 23.47180700 |
| C                | 12.35570700 | 6.39911900 | 23.86563200 |
| H                | 11.73937700 | 6.23617600 | 22.97962400 |
| C                | 12.23539100 | 7.87334600 | 24.31175700 |
| H                | 11.19731900 | 8.01071400 | 24.62439400 |
| C                | 12.50163600 | 8.79551400 | 23.11698300 |
| H                | 11.82338000 | 8.57613600 | 22.28500900 |
| H                | 13.52962900 | 8.69158100 | 22.75100300 |
| H                | 12.35782700 | 9.84174400 | 23.40456200 |
| C                | 13.12953000 | 8.22590200 | 25.50524000 |
| H                | 14.19361500 | 8.15787500 | 25.25427200 |
| H                | 12.93519500 | 7.58172300 | 26.36667200 |
| H                | 12.93212500 | 9.25502700 | 25.82180900 |
| C                | 8.92335600  | 6.85875000 | 24.65340900 |
| C                | 7.95186200  | 5.81138300 | 24.46598200 |
| C                | 7.01307100  | 5.35843000 | 25.38957500 |
| C                | 6.66097100  | 6.02542000 | 26.67667900 |
| H                | 5.62136900  | 5.79803500 | 26.91575100 |
| H                | 6.79291100  | 7.10825600 | 26.62404200 |
| H                | 7.27279300  | 5.64220900 | 27.49673900 |
| O                | 5.02544400  | 6.01096700 | 24.37715900 |
| C                | 4.17227400  | 5.10814600 | 24.60863000 |
| O                | 4.30859100  | 4.01618700 | 25.19393300 |
| O                | 2.90662100  | 5.44371200 | 24.11342100 |
| C                | 1.88808600  | 4.47496300 | 24.33583100 |
| H                | 1.72747900  | 4.28850100 | 25.40379800 |
| H                | 0.97316000  | 4.88542500 | 23.89846800 |
| H                | 2.12145000  | 3.51788300 | 23.85533900 |
| H                | 6.55422400  | 4.39263300 | 25.21774000 |
| H                | 9.35780300  | 7.29364400 | 23.75550600 |
| H                | 8.79631900  | 7.56555800 | 25.46809600 |
| H                | 7.95509400  | 5.29390800 | 23.50432500 |
| <b>TS1a-endo</b> |             |            |             |
| Rh               | 10.20818800 | 4.95359900 | 25.42145900 |
| C                | 11.44860100 | 6.90636500 | 27.96129100 |
| O                | 9.34237300  | 1.07770600 | 27.13589700 |

|   |             |             |             |
|---|-------------|-------------|-------------|
| N | 10.14417000 | 2.84557000  | 26.02026200 |
| P | 11.06982800 | 5.21748700  | 27.40269400 |
| N | 12.17745300 | 5.01614100  | 24.62597900 |
| O | 14.37350100 | 4.74462700  | 24.31246300 |
| C | 12.78517600 | 7.32308900  | 28.06194700 |
| H | 13.59439500 | 6.62789300  | 27.87403400 |
| C | 13.08065400 | 8.64246500  | 28.40624800 |
| H | 14.11721600 | 8.95549600  | 28.48190700 |
| C | 8.90235400  | 4.42667000  | 30.80721200 |
| H | 8.70066800  | 4.93619800  | 31.74385700 |
| C | 9.71141400  | 5.04147600  | 29.84898200 |
| H | 10.13803200 | 6.01366400  | 30.06169300 |
| C | 9.98476300  | 4.41264800  | 28.63137400 |
| C | 10.41522000 | 7.82636100  | 28.20974200 |
| H | 9.37805600  | 7.51967100  | 28.14603100 |
| C | 10.71930300 | 9.13977000  | 28.55971100 |
| H | 9.91464600  | 9.84085300  | 28.75738000 |
| C | 12.05149800 | 9.55140700  | 28.65430600 |
| H | 12.28472000 | 10.57705900 | 28.92303800 |
| C | 8.36646900  | 3.16564000  | 30.55950600 |
| H | 7.73667100  | 2.68127200  | 31.29833700 |
| C | 8.64204100  | 2.51819500  | 29.35644700 |
| H | 8.22882300  | 1.53624200  | 29.16156000 |
| C | 9.67672400  | 2.38274800  | 27.13058700 |
| C | 9.44297900  | 3.12488300  | 28.37978500 |
| C | 9.43427500  | 0.62144900  | 25.74947300 |
| H | 8.41556200  | 0.54237000  | 25.36243900 |
| H | 9.90627600  | -0.36007900 | 25.75395900 |
| C | 11.72598400 | 1.37576800  | 24.76648900 |
| H | 12.19557300 | 2.30919100  | 24.43903200 |
| C | 10.25210100 | 1.72682100  | 25.05375800 |
| H | 9.77454300  | 2.03186800  | 24.11894600 |
| C | 12.47057400 | 0.86814500  | 26.00535400 |
| H | 12.09520800 | -0.11044500 | 26.32498100 |
| H | 12.38432000 | 1.56006200  | 26.84668600 |
| H | 13.53492200 | 0.75180900  | 25.78101000 |
| C | 12.65099000 | 4.30267700  | 27.54875000 |
| C | 11.80964200 | 0.37152200  | 23.61234800 |
| H | 11.31549300 | 0.75517400  | 22.71277800 |
| H | 11.33606300 | -0.58082900 | 23.87765400 |
| H | 12.85469200 | 0.16203300  | 23.36250300 |
| C | 12.97293900 | 3.76702200  | 28.80071500 |
| H | 12.28164100 | 3.87595900  | 29.62806800 |
| C | 14.17950000 | 3.09657000  | 29.00522600 |

|                 |             |            |             |
|-----------------|-------------|------------|-------------|
| H               | 14.40458000 | 2.68582300 | 29.98410300 |
| C               | 15.08695700 | 2.96119900 | 27.95661800 |
| H               | 16.02653100 | 2.43996600 | 28.10687900 |
| C               | 14.78402500 | 3.49306200 | 26.70658400 |
| H               | 15.48063300 | 3.38188800 | 25.88499700 |
| C               | 13.56974700 | 4.15984000 | 26.48468600 |
| C               | 13.31091400 | 4.66347500 | 25.13247200 |
| C               | 13.85120500 | 5.04889900 | 22.98257400 |
| H               | 13.87868700 | 4.12516000 | 22.39931800 |
| H               | 14.50855600 | 5.79231000 | 22.53406100 |
| C               | 12.41742400 | 5.53912900 | 23.25501600 |
| H               | 11.70754000 | 5.06559400 | 22.57237400 |
| C               | 12.22660500 | 7.06866400 | 23.18858400 |
| H               | 11.18775400 | 7.25296100 | 23.47234600 |
| C               | 12.41629500 | 7.55817500 | 21.74863000 |
| H               | 11.76380200 | 7.01678900 | 21.05437000 |
| H               | 13.45047700 | 7.43071200 | 21.40929700 |
| H               | 12.17617100 | 8.62366800 | 21.67631000 |
| C               | 13.12463100 | 7.82482200 | 24.17196400 |
| H               | 14.18786700 | 7.66766900 | 23.95736600 |
| H               | 12.93415700 | 7.52219600 | 25.20566300 |
| H               | 12.93236800 | 8.90041700 | 24.10315400 |
| C               | 9.29442400  | 6.80270200 | 25.09233100 |
| H               | 9.70802700  | 7.69801800 | 25.54844300 |
| H               | 9.10781000  | 6.88699400 | 24.02177200 |
| C               | 8.34729300  | 6.02152700 | 25.85594900 |
| H               | 8.14832300  | 6.26338800 | 26.89690500 |
| C               | 7.56061100  | 5.00229600 | 25.28129300 |
| C               | 6.72994400  | 4.08008800 | 26.11203100 |
| H               | 5.78665000  | 3.87326800 | 25.60288300 |
| H               | 6.52461400  | 4.49734000 | 27.10149900 |
| H               | 7.24802900  | 3.12384300 | 26.24157500 |
| O               | 5.99021500  | 6.05865500 | 24.32012800 |
| C               | 6.37175900  | 6.36100100 | 23.14310600 |
| O               | 7.34044500  | 5.92588700 | 22.49352700 |
| O               | 5.54516900  | 7.31162400 | 22.56843600 |
| C               | 5.89238900  | 7.70402400 | 21.24080100 |
| H               | 5.86735900  | 6.85607300 | 20.54831800 |
| H               | 5.14626600  | 8.44349800 | 20.93917500 |
| H               | 6.89008400  | 8.15390000 | 21.20124500 |
| H               | 7.79394100  | 4.69700200 | 24.26654000 |
| <b>TS1b-exo</b> |             |            |             |
| Rh              | 9.91247700  | 5.02920600 | 24.77450000 |
| C               | 10.05739400 | 6.91049900 | 27.64570600 |

|   |             |             |             |
|---|-------------|-------------|-------------|
| O | 8.94591500  | 0.96810400  | 26.03445400 |
| N | 9.84599600  | 2.86973400  | 25.26984800 |
| P | 10.03986200 | 5.23152000  | 26.95148900 |
| N | 12.00071500 | 5.30223800  | 24.74391200 |
| O | 14.19323500 | 5.07332200  | 25.09341700 |
| C | 11.26533100 | 7.44568200  | 28.12084100 |
| H | 12.16459500 | 6.84200700  | 28.14639900 |
| C | 11.31475100 | 8.76646800  | 28.56656500 |
| H | 12.25274300 | 9.17247400  | 28.93203200 |
| C | 6.99393600  | 4.04348700  | 29.44429300 |
| H | 6.44338300  | 4.48068900  | 30.27077700 |
| C | 7.98403500  | 4.79250000  | 28.80535600 |
| H | 8.19577000  | 5.79406400  | 29.15545600 |
| C | 8.70639800  | 4.25952100  | 27.73457400 |
| C | 8.89978500  | 7.70866600  | 27.62250100 |
| H | 7.94406800  | 7.31769000  | 27.28495500 |
| C | 8.96059900  | 9.02402200  | 28.08030100 |
| H | 8.05996500  | 9.63032900  | 28.07180200 |
| C | 10.16493100 | 9.55749700  | 28.54637100 |
| H | 10.20597100 | 10.58448200 | 28.89634000 |
| C | 6.72234500  | 2.74501000  | 29.02255900 |
| H | 5.95450600  | 2.15660700  | 29.51380300 |
| C | 7.43949200  | 2.19540900  | 27.96157800 |
| H | 7.22773500  | 1.18678100  | 27.62881700 |
| C | 9.11686000  | 2.29785500  | 26.16842800 |
| C | 8.42898900  | 2.93617200  | 27.30181400 |
| C | 9.49761700  | 0.61102000  | 24.72856100 |
| H | 8.65666600  | 0.47374100  | 24.04422200 |
| H | 10.03993600 | -0.32653600 | 24.84248200 |
| C | 11.88967900 | 1.62590200  | 24.54808700 |
| H | 12.33647700 | 2.61853900  | 24.42930000 |
| C | 10.37186300 | 1.82420200  | 24.35907900 |
| H | 10.18485700 | 2.13856800  | 23.32915400 |
| C | 12.25654000 | 1.09360700  | 25.93717700 |
| H | 11.91898700 | 0.06006600  | 26.07136300 |
| H | 11.82659500 | 1.70160900  | 26.73692800 |
| H | 13.34284200 | 1.10105200  | 26.06564000 |
| C | 11.56051500 | 4.43041200  | 27.59979300 |
| C | 12.44107100 | 0.72278700  | 23.43953500 |
| H | 12.22734100 | 1.13429700  | 22.44684200 |
| H | 12.00484800 | -0.28178500 | 23.48966900 |
| H | 13.52635100 | 0.61689700  | 23.53650800 |
| C | 11.49577400 | 3.87604300  | 28.88309100 |
| H | 10.56700000 | 3.90912700  | 29.43983800 |

|                  |             |            |             |
|------------------|-------------|------------|-------------|
| C                | 12.61684200 | 3.28340400 | 29.46593700 |
| H                | 12.54008800 | 2.85892900 | 30.46163500 |
| C                | 13.82430400 | 3.24136200 | 28.77161300 |
| H                | 14.69899100 | 2.77940900 | 29.21707800 |
| C                | 13.90713200 | 3.79209800 | 27.49636500 |
| H                | 14.83936000 | 3.75626800 | 26.94643000 |
| C                | 12.78494500 | 4.38425400 | 26.89842700 |
| C                | 12.93830500 | 4.93403800 | 25.55213400 |
| C                | 14.07892900 | 5.43457700 | 23.68071400 |
| H                | 14.26544100 | 4.53166200 | 23.09380100 |
| H                | 14.84133800 | 6.18229000 | 23.46942200 |
| C                | 12.63264700 | 5.93897800 | 23.55679800 |
| H                | 12.15736700 | 5.55112700 | 22.65281100 |
| C                | 12.47706200 | 7.47435300 | 23.59467900 |
| H                | 11.40240000 | 7.66590200 | 23.63528900 |
| C                | 13.02070000 | 8.08714000 | 22.29941600 |
| H                | 12.54239600 | 7.64506800 | 21.41820300 |
| H                | 14.10278700 | 7.94103200 | 22.20485400 |
| H                | 12.83152200 | 9.16506800 | 22.28193600 |
| C                | 13.10932400 | 8.11183400 | 24.83569000 |
| H                | 14.19528100 | 7.96832600 | 24.86259500 |
| H                | 12.68342200 | 7.70506300 | 25.75724100 |
| H                | 12.92057000 | 9.19017700 | 24.83654700 |
| C                | 9.02653400  | 6.85158500 | 24.22176800 |
| C                | 8.00528100  | 5.84506700 | 24.04592200 |
| C                | 7.14092700  | 5.39148100 | 25.04695000 |
| C                | 6.28332800  | 4.18054200 | 24.86380000 |
| H                | 5.46997900  | 4.17301200 | 25.59015000 |
| H                | 6.87530900  | 3.27084500 | 25.01046300 |
| H                | 5.86734700  | 4.14340700 | 23.85299300 |
| O                | 5.43235800  | 6.78964200 | 24.98691200 |
| C                | 5.26003600  | 7.27955600 | 26.14165900 |
| O                | 5.83886200  | 7.00028300 | 27.21213700 |
| O                | 4.27585900  | 8.25920000 | 26.15427700 |
| C                | 4.03440700  | 8.86759800 | 27.42126100 |
| H                | 4.92525800  | 9.38029700 | 27.80044100 |
| H                | 3.23561300  | 9.59664000 | 27.26115000 |
| H                | 3.71558100  | 8.13436700 | 28.16961900 |
| H                | 7.22753800  | 5.78362100 | 26.04947200 |
| H                | 9.42836500  | 7.29141000 | 23.31064400 |
| H                | 8.93734100  | 7.55838300 | 25.04289200 |
| H                | 7.85858000  | 5.43377500 | 23.04566400 |
| <b>TS1b-endo</b> |             |            |             |
| Rh               | 9.72811200  | 5.53496000 | 25.36728900 |

|   |             |             |             |
|---|-------------|-------------|-------------|
| C | 10.98153300 | 7.51994700  | 27.88354800 |
| O | 9.13313700  | 1.61064900  | 27.04542800 |
| N | 9.85687900  | 3.42143400  | 25.94817100 |
| P | 10.65809600 | 5.82279800  | 27.31840700 |
| N | 11.65482100 | 5.74264100  | 24.48586200 |
| O | 13.85785500 | 5.64863900  | 24.11455100 |
| C | 12.30377800 | 7.97483700  | 28.00511700 |
| H | 13.13506400 | 7.30564700  | 27.82001900 |
| C | 12.55548500 | 9.29865800  | 28.36637700 |
| H | 13.58124400 | 9.64148600  | 28.45829900 |
| C | 8.61104700  | 4.90407000  | 30.76177000 |
| H | 8.39872500  | 5.39834600  | 31.70417900 |
| C | 9.37095100  | 5.56432300  | 29.79332600 |
| H | 9.74966600  | 6.55722700  | 30.00170800 |
| C | 9.65338300  | 4.95475100  | 28.56873800 |
| C | 9.91782700  | 8.40621400  | 28.12766600 |
| H | 8.89126500  | 8.06985700  | 28.04616200 |
| C | 10.17844900 | 9.72415300  | 28.49460500 |
| H | 9.35104400  | 10.39903400 | 28.68937200 |
| C | 11.49669700 | 10.17378900 | 28.61053700 |
| H | 11.69600800 | 11.20296300 | 28.89273700 |
| C | 8.13552400  | 3.61893700  | 30.51605500 |
| H | 7.54395900  | 3.10003200  | 31.26296000 |
| C | 8.42020700  | 2.99191100  | 29.30401300 |
| H | 8.05230200  | 1.99167000  | 29.11081800 |
| C | 9.41608400  | 2.92620400  | 27.05579300 |
| C | 9.17007000  | 3.64397200  | 28.31673600 |
| C | 9.22752100  | 1.17695200  | 25.65133000 |
| H | 8.20817100  | 1.05967900  | 25.27598100 |
| H | 9.74109800  | 0.21666100  | 25.63688000 |
| C | 11.46625300 | 2.03739600  | 24.62954400 |
| H | 11.89300000 | 2.99595700  | 24.31544500 |
| C | 9.98822900  | 2.32531900  | 24.95989200 |
| H | 9.47656300  | 2.62855600  | 24.04265100 |
| C | 12.25930800 | 1.52715000  | 25.83638300 |
| H | 11.92834200 | 0.52753400  | 26.13932600 |
| H | 12.16782300 | 2.19392700  | 26.69708500 |
| H | 13.32135900 | 1.45602300  | 25.58422300 |
| C | 12.27984800 | 4.97677400  | 27.37687800 |
| C | 11.55595800 | 1.06655400  | 23.44739400 |
| H | 11.03234100 | 1.45911100  | 22.56851400 |
| H | 11.11470400 | 0.09436100  | 23.69614100 |
| H | 12.60106600 | 0.89422100  | 23.17098900 |
| C | 12.67419400 | 4.41456300  | 28.59594800 |

|   |             |            |             |
|---|-------------|------------|-------------|
| H | 12.01245100 | 4.46517200 | 29.45274400 |
| C | 13.91580800 | 3.79154600 | 28.72861200 |
| H | 14.19833800 | 3.35827000 | 29.68252500 |
| C | 14.78371100 | 3.73114000 | 27.64036500 |
| H | 15.74963500 | 3.24620500 | 27.73433600 |
| C | 14.40740200 | 4.29055100 | 26.42242400 |
| H | 15.07347900 | 4.23629800 | 25.57029000 |
| C | 13.15808400 | 4.91066600 | 26.27253200 |
| C | 12.82403200 | 5.45202800 | 24.95026800 |
| C | 13.28844400 | 5.99537500 | 22.81533700 |
| H | 13.38605300 | 5.12030100 | 22.16835600 |
| H | 13.87247600 | 6.82187700 | 22.41326500 |
| C | 11.82147000 | 6.34228100 | 23.13548700 |
| H | 11.14342400 | 5.83524400 | 22.44455500 |
| C | 11.49253000 | 7.85024700 | 23.13511300 |
| H | 10.43969000 | 7.92798500 | 23.41800400 |
| C | 11.64087900 | 8.42226700 | 21.72095600 |
| H | 11.04480900 | 7.85621400 | 20.99638200 |
| H | 12.68358300 | 8.40912100 | 21.38421600 |
| H | 11.30192200 | 9.46279700 | 21.69769200 |
| C | 12.31496400 | 8.63722100 | 24.15898100 |
| H | 13.38747000 | 8.60096800 | 23.93497800 |
| H | 12.16249300 | 8.25683800 | 25.17257900 |
| H | 12.01514700 | 9.69011200 | 24.15185200 |
| C | 8.62823700  | 7.31876500 | 25.09008200 |
| C | 7.85550600  | 6.46084500 | 25.95002000 |
| H | 7.77653200  | 6.67948000 | 27.00962600 |
| C | 7.15951900  | 5.30925800 | 25.53200100 |
| C | 6.97365200  | 4.87303500 | 24.10956100 |
| H | 6.15074900  | 4.16032400 | 24.04437200 |
| H | 6.77164000  | 5.72085600 | 23.44998800 |
| H | 7.88139300  | 4.37207600 | 23.73889400 |
| O | 5.51645600  | 5.43008800 | 27.97847300 |
| C | 4.85461700  | 5.92611400 | 27.05029200 |
| O | 5.07745700  | 5.90736500 | 25.79954100 |
| O | 3.68625500  | 6.62044600 | 27.35267800 |
| C | 3.35478600  | 6.68061100 | 28.73743800 |
| H | 4.13283700  | 7.18672300 | 29.31950700 |
| H | 2.42316100  | 7.24927400 | 28.80353000 |
| H | 3.20323900  | 5.68266300 | 29.16339200 |
| H | 6.92061500  | 4.60135200 | 26.31338600 |
| H | 9.00045300  | 8.25564800 | 25.49480800 |
| H | 8.37613300  | 7.36453300 | 24.02983900 |

IM2a-exo

|    |             |             |             |
|----|-------------|-------------|-------------|
| Rh | 9.82310800  | 5.10250500  | 25.34987100 |
| C  | 10.48079200 | 6.67121100  | 28.48653500 |
| O  | 8.98458800  | 1.02651400  | 26.31169600 |
| N  | 9.81010000  | 2.98573900  | 25.62696100 |
| P  | 10.28102900 | 5.09538500  | 27.57964400 |
| N  | 11.97383400 | 5.26337200  | 25.02822700 |
| O  | 14.19718100 | 5.05572100  | 25.19321700 |
| C  | 11.77288600 | 7.21255600  | 28.59052000 |
| H  | 12.63250700 | 6.66012500  | 28.23084900 |
| C  | 11.96643800 | 8.46995600  | 29.16156400 |
| H  | 12.97172500 | 8.87284800  | 29.23503500 |
| C  | 7.65025100  | 3.55205100  | 30.35392200 |
| H  | 7.27044700  | 3.84137000  | 31.32841900 |
| C  | 8.58734200  | 4.36425000  | 29.71123600 |
| H  | 8.93087600  | 5.26404900  | 30.20446100 |
| C  | 9.08498200  | 4.02647400  | 28.45160400 |
| C  | 9.38896100  | 7.41675800  | 28.96205500 |
| H  | 8.38185700  | 7.02790400  | 28.89237500 |
| C  | 9.59086700  | 8.66878200  | 29.54177500 |
| H  | 8.73767700  | 9.22708900  | 29.91403800 |
| C  | 10.87796900 | 9.20050800  | 29.64013400 |
| H  | 11.03118600 | 10.17728800 | 30.08839200 |
| C  | 7.21189600  | 2.37956900  | 29.74494500 |
| H  | 6.47919400  | 1.74596800  | 30.23351300 |
| C  | 7.72731300  | 2.00933600  | 28.50425500 |
| H  | 7.40252800  | 1.08849700  | 28.03607300 |
| C  | 9.17961200  | 2.33376500  | 26.55167500 |
| C  | 8.66207000  | 2.81860600  | 27.84312400 |
| C  | 9.37351300  | 0.79615500  | 24.92137400 |
| H  | 8.45802100  | 0.76536200  | 24.32566700 |
| H  | 9.88433500  | -0.16415300 | 24.87593000 |
| C  | 11.76780400 | 1.75670100  | 24.64128700 |
| H  | 12.23901700 | 2.74045000  | 24.57020500 |
| C  | 10.24901300 | 2.00998600  | 24.59024300 |
| H  | 9.99074100  | 2.40469800  | 23.61296000 |
| C  | 12.22837300 | 1.08532200  | 25.93888300 |
| H  | 11.85609300 | 0.05741400  | 26.01048500 |
| H  | 11.89646100 | 1.63263600  | 26.82460700 |
| H  | 13.32086400 | 1.03985000  | 25.97063500 |
| C  | 11.86732100 | 4.22943100  | 27.92550800 |
| C  | 12.19099100 | 0.94737200  | 23.41000000 |
| H  | 11.90653500 | 1.45862500  | 22.48357400 |
| H  | 11.72728300 | -0.04604800 | 23.40376400 |
| H  | 13.27640400 | 0.80530100  | 23.40048600 |



|   |             |            |             |
|---|-------------|------------|-------------|
| C | 11.97616800 | 3.56298600 | 29.15271300 |
| H | 11.13131500 | 3.53572600 | 29.82947100 |
| C | 13.15863500 | 2.92705200 | 29.52839800 |
| H | 13.21004200 | 2.41273200 | 30.48257100 |
| C | 14.26286000 | 2.95836300 | 28.67998300 |
| H | 15.18785900 | 2.46503800 | 28.95955000 |
| C | 14.17537600 | 3.62297200 | 27.46167700 |
| H | 15.02683700 | 3.64147600 | 26.79399600 |
| C | 12.98577200 | 4.25832500 | 27.06749000 |
| C | 12.98078200 | 4.89482300 | 25.74352300 |
| C | 13.99614700 | 5.49559600 | 23.82020800 |
| H | 14.30516800 | 4.67871900 | 23.16431900 |
| H | 14.63920600 | 6.36044000 | 23.65764200 |
| C | 12.48807200 | 5.79915600 | 23.73569000 |
| H | 12.01522300 | 5.22704200 | 22.93884300 |
| C | 12.13502800 | 7.28211800 | 23.53029900 |
| H | 11.04485800 | 7.31802600 | 23.46756600 |
| C | 12.68305000 | 7.77467800 | 22.18585000 |
| H | 12.34866500 | 7.13412700 | 21.36205100 |
| H | 13.77869000 | 7.79704600 | 22.17305400 |
| H | 12.33304800 | 8.79242500 | 21.98521000 |
| C | 12.59271000 | 8.16467400 | 24.69413500 |
| H | 13.68442200 | 8.16252500 | 24.79553400 |
| H | 12.16328400 | 7.82985600 | 25.64317800 |
| H | 12.28207400 | 9.20211800 | 24.53214100 |
| C | 9.20341200  | 7.29620700 | 25.42081900 |
| C | 8.24715000  | 6.49110900 | 24.79294800 |
| C | 7.61822900  | 5.39654400 | 25.45892900 |
| C | 6.89256300  | 5.55172200 | 26.76943300 |
| H | 5.87291200  | 5.89652200 | 26.54835100 |
| H | 7.34792600  | 6.29553300 | 27.42170500 |
| H | 6.79958500  | 4.60931800 | 27.30938000 |
| O | 7.92896900  | 3.60992100 | 22.92295000 |
| C | 8.92989500  | 4.22046100 | 22.54165600 |
| O | 9.80616800  | 4.85998600 | 23.23911800 |
| O | 9.25978200  | 4.27743100 | 21.21313600 |
| C | 8.37297600  | 3.57898500 | 20.33147300 |
| H | 7.36057800  | 3.99088100 | 20.37933500 |
| H | 8.78102500  | 3.71771000 | 19.32862900 |
| H | 8.33477000  | 2.51231700 | 20.57146400 |
| H | 7.16868700  | 4.67173200 | 24.78573900 |
| H | 9.75265300  | 8.01560700 | 24.82717500 |
| H | 9.15292500  | 7.50992100 | 26.48013700 |
| H | 8.21176800  | 6.52243300 | 23.70900400 |

**IM2a-endo**

|    |             |             |             |
|----|-------------|-------------|-------------|
| Rh | 9.80354000  | 5.08396000  | 25.58233600 |
| C  | 11.29482100 | 6.92051700  | 28.13223200 |
| O  | 9.23403000  | 1.10095600  | 27.11846800 |
| N  | 9.83256400  | 2.96341500  | 26.03882100 |
| P  | 10.89159600 | 5.24317700  | 27.53761700 |
| N  | 11.70671200 | 5.11959600  | 24.61464300 |
| O  | 13.85767800 | 4.80018300  | 24.09306500 |
| C  | 12.53206100 | 7.46442500  | 27.74766900 |
| H  | 13.25794400 | 6.85993400  | 27.21667000 |
| C  | 12.83956600 | 8.79165900  | 28.04385700 |
| H  | 13.79912500 | 9.19784800  | 27.73976300 |
| C  | 9.19123400  | 4.06592600  | 31.10088200 |
| H  | 9.10916300  | 4.46928800  | 32.10489900 |
| C  | 9.86957300  | 4.79296400  | 30.11987300 |
| H  | 10.32326300 | 5.73844300  | 30.38662300 |
| C  | 9.98429000  | 4.30715900  | 28.81493400 |
| C  | 10.37430500 | 7.73026900  | 28.81827800 |
| H  | 9.41587700  | 7.33835500  | 29.13647700 |
| C  | 10.69276500 | 9.05430400  | 29.11848700 |
| H  | 9.97573300  | 9.66515100  | 29.65784100 |
| C  | 11.92175500 | 9.58964700  | 28.72873800 |
| H  | 12.16347500 | 10.62229600 | 28.96037800 |
| C  | 8.63465500  | 2.82923000  | 30.78806200 |
| H  | 8.10479000  | 2.25744300  | 31.54262700 |
| C  | 8.76646500  | 2.31645100  | 29.49919600 |
| H  | 8.34209400  | 1.35060400  | 29.25547900 |
| C  | 9.52349800  | 2.41428900  | 27.16666200 |
| C  | 9.43292800  | 3.03817400  | 28.49961100 |
| C  | 9.15100600  | 0.74636500  | 25.70154700 |
| H  | 8.09079500  | 0.68352300  | 25.44273600 |
| H  | 9.62259100  | -0.22728800 | 25.57713700 |
| C  | 11.31678700 | 1.60255500  | 24.55453600 |
| H  | 11.73852200 | 2.55993700  | 24.23642800 |
| C  | 9.87064800  | 1.90563200  | 24.99643000 |
| H  | 9.30900200  | 2.26722900  | 24.13568500 |
| C  | 12.18757500 | 1.03765700  | 25.68180000 |
| H  | 11.85639400 | 0.03638000  | 25.97917000 |
| H  | 12.17954400 | 1.67797400  | 26.56750900 |
| H  | 13.22590700 | 0.95241800  | 25.34727400 |
| C  | 12.50900700 | 4.38268700  | 27.49536000 |
| C  | 11.30262200 | 0.67040800  | 23.33813800 |
| H  | 10.71901000 | 1.09926000  | 22.51615200 |
| H  | 10.87024000 | -0.30592100 | 23.58634700 |

|   |             |            |             |
|---|-------------|------------|-------------|
| H | 12.32162700 | 0.49766600 | 22.97698100 |
| C | 12.98994900 | 3.85396800 | 28.69927900 |
| H | 12.39591000 | 3.93810000 | 29.60125500 |
| C | 14.22821400 | 3.21618400 | 28.76134100 |
| H | 14.57508900 | 2.80975900 | 29.70578800 |
| C | 15.00977900 | 3.10573400 | 27.61317500 |
| H | 15.97331400 | 2.60842200 | 27.64873600 |
| C | 14.54946000 | 3.63261600 | 26.41111800 |
| H | 15.14923800 | 3.54029200 | 25.51510700 |
| C | 13.30012000 | 4.27031700 | 26.33406400 |
| C | 12.88184200 | 4.76418700 | 25.01587300 |
| C | 13.22650200 | 5.07466400 | 22.80919400 |
| H | 13.24709100 | 4.14882200 | 22.22956300 |
| H | 13.82107300 | 5.83685400 | 22.30673800 |
| C | 11.80105800 | 5.51748600 | 23.18045100 |
| H | 11.06338200 | 4.93517000 | 22.63212800 |
| C | 11.50910700 | 7.01324800 | 22.96365100 |
| H | 10.48625800 | 7.17507400 | 23.30697200 |
| C | 11.54349000 | 7.33121900 | 21.46464300 |
| H | 10.86250000 | 6.67650800 | 20.90982800 |
| H | 12.54845000 | 7.20870000 | 21.04497200 |
| H | 11.23670400 | 8.36712600 | 21.28816500 |
| C | 12.43438500 | 7.92462900 | 23.77323500 |
| H | 13.48083400 | 7.81925800 | 23.46410000 |
| H | 12.37276000 | 7.70864100 | 24.84398900 |
| H | 12.15472400 | 8.97324200 | 23.62837800 |
| C | 9.15073800  | 7.13255100 | 25.42830700 |
| H | 9.82325300  | 7.91588700 | 25.76582600 |
| H | 8.76114500  | 7.22159800 | 24.42014500 |
| C | 8.33456200  | 6.48737700 | 26.40410500 |
| H | 8.44478200  | 6.73205200 | 27.45587700 |
| C | 7.59826300  | 5.33957500 | 26.08075500 |
| C | 6.85318300  | 4.54436400 | 27.10916800 |
| H | 5.79251600  | 4.82736400 | 27.08390500 |
| H | 7.23087300  | 4.71841700 | 28.11872200 |
| H | 6.89795700  | 3.47237400 | 26.89409200 |
| O | 9.06269400  | 4.50497400 | 23.65164700 |
| C | 8.46292000  | 5.18034600 | 22.73747900 |
| O | 7.75652100  | 6.18719900 | 22.84929900 |
| O | 8.68984800  | 4.61907600 | 21.50430000 |
| C | 8.04247500  | 5.26825300 | 20.40353800 |
| H | 8.37867700  | 6.30380600 | 20.30039000 |
| H | 8.32317700  | 4.69858200 | 19.51565500 |
| H | 6.95502200  | 5.25722100 | 20.52193200 |

|                 |             |             |             |
|-----------------|-------------|-------------|-------------|
| H               | 7.26882900  | 5.22369700  | 25.05335000 |
| <b>IM2b-exo</b> |             |             |             |
| Rh              | 9.90895300  | 5.17540600  | 24.70821700 |
| C               | 9.90165500  | 7.05306400  | 27.69987600 |
| O               | 8.81930500  | 1.18854100  | 25.87447700 |
| N               | 9.79294800  | 3.07509900  | 25.17787700 |
| P               | 9.95541700  | 5.39038000  | 26.95884300 |
| N               | 12.05724800 | 5.23878600  | 24.71959700 |
| O               | 14.20678600 | 4.97334200  | 25.27962200 |
| C               | 11.09344100 | 7.64570800  | 28.14332000 |
| H               | 12.02163000 | 7.08599400  | 28.13548700 |
| C               | 11.08971400 | 8.96368300  | 28.60128000 |
| H               | 12.01615500 | 9.41278000  | 28.94525700 |
| C               | 6.86596100  | 4.10931100  | 29.37259400 |
| H               | 6.32511100  | 4.50035700  | 30.22826900 |
| C               | 7.88920400  | 4.86850100  | 28.80004300 |
| H               | 8.13384300  | 5.83054300  | 29.23169900 |
| C               | 8.60197700  | 4.39865600  | 27.69385100 |
| C               | 8.71091600  | 7.80081500  | 27.70845900 |
| H               | 7.78487600  | 7.36300900  | 27.35168900 |
| C               | 8.71426200  | 9.11356600  | 28.17635600 |
| H               | 7.78846200  | 9.68003700  | 28.18774100 |
| C               | 9.90281600  | 9.69750300  | 28.62196200 |
| H               | 9.90278100  | 10.72152300 | 28.98232700 |
| C               | 6.55045200  | 2.85908600  | 28.84833500 |
| H               | 5.75535000  | 2.26349200  | 29.28430100 |
| C               | 7.26603300  | 2.36571600  | 27.75979100 |
| H               | 7.03011700  | 1.38996000  | 27.35396500 |
| C               | 9.00939500  | 2.50927300  | 26.03746700 |
| C               | 8.29139300  | 3.11886400  | 27.16955800 |
| C               | 9.41609600  | 0.84017000  | 24.58531300 |
| H               | 8.60151600  | 0.75829000  | 23.86089600 |
| H               | 9.91086300  | -0.12285500 | 24.70036200 |
| C               | 11.84357700 | 1.74897400  | 24.60379300 |
| H               | 12.34917700 | 2.71180100  | 24.49720600 |
| C               | 10.35650400 | 2.01685700  | 24.29474900 |
| H               | 10.26381000 | 2.36139300  | 23.26632900 |
| C               | 12.08542600 | 1.22831300  | 26.02437700 |
| H               | 11.67346800 | 0.22171800  | 26.15848300 |
| H               | 11.64466000 | 1.88218700  | 26.78111700 |
| H               | 13.15953000 | 1.17127600  | 26.22546300 |
| C               | 11.44386700 | 4.61591200  | 27.69265000 |
| C               | 12.42633600 | 0.79910100  | 23.55132900 |
| H               | 12.29654100 | 1.19958500  | 22.53988000 |

|   |             |             |             |
|---|-------------|-------------|-------------|
| H | 11.94621200 | -0.18575900 | 23.58873700 |
| H | 13.49738500 | 0.65055300  | 23.72271000 |
| C | 11.33583600 | 4.14934500  | 29.00906300 |
| H | 10.39251400 | 4.23443700  | 29.53481300 |
| C | 12.42389600 | 3.57395300  | 29.66262400 |
| H | 12.31055300 | 3.21667200  | 30.68098400 |
| C | 13.64632800 | 3.46146200  | 29.00357900 |
| H | 14.50000400 | 3.01077000  | 29.49869400 |
| C | 13.77210600 | 3.92596200  | 27.69898100 |
| H | 14.71771600 | 3.83047800  | 27.18200800 |
| C | 12.68123200 | 4.50395500  | 27.02642200 |
| C | 12.91144900 | 4.93588700  | 25.64039600 |
| C | 14.24540900 | 5.18046900  | 23.83998400 |
| H | 14.51907000 | 4.22948700  | 23.37644800 |
| H | 15.01290000 | 5.92569800  | 23.63594200 |
| C | 12.81569900 | 5.62703600  | 23.49504100 |
| H | 12.42978500 | 5.04485700  | 22.65967700 |
| C | 12.66745100 | 7.12530700  | 23.17514700 |
| H | 11.60916400 | 7.27548800  | 22.96625300 |
| C | 13.42868500 | 7.46079300  | 21.88850100 |
| H | 13.11212300 | 6.80971000  | 21.06648500 |
| H | 14.51275700 | 7.35401600  | 22.00901100 |
| H | 13.23181500 | 8.49625000  | 21.59226700 |
| C | 13.07490200 | 8.02503700  | 24.34433500 |
| H | 14.13578100 | 7.91265300  | 24.59800900 |
| H | 12.48567300 | 7.80676500  | 25.24083200 |
| H | 12.91041800 | 9.07640800  | 24.08646200 |
| C | 9.35179500  | 7.28963300  | 24.37019300 |
| C | 8.31781000  | 6.44029600  | 23.91407300 |
| C | 7.68213100  | 5.49879300  | 24.74642500 |
| C | 6.78544600  | 4.43700200  | 24.17274400 |
| H | 5.75589700  | 4.81079300  | 24.09551000 |
| H | 6.75514600  | 3.55335500  | 24.81590800 |
| H | 7.11809700  | 4.13184800  | 23.17695900 |
| O | 10.01381000 | 4.50313100  | 22.69273000 |
| C | 10.15030100 | 5.18148100  | 21.60523000 |
| O | 10.02674700 | 6.39482600  | 21.42391000 |
| O | 10.47213900 | 4.34346100  | 20.56846800 |
| C | 10.63459400 | 4.97869400  | 19.29507900 |
| H | 11.45284100 | 5.70462300  | 19.31570400 |
| H | 10.86966900 | 4.17781200  | 18.59166800 |
| H | 9.71675300  | 5.48656800  | 18.98473100 |
| H | 7.47600700  | 5.77028400  | 25.77738100 |
| H | 9.89704300  | 7.83846700  | 23.61341600 |

|                  |             |             |             |
|------------------|-------------|-------------|-------------|
| H                | 9.31255200  | 7.75201500  | 25.34758700 |
| H                | 8.23699400  | 6.30281600  | 22.84099700 |
| <b>IM2b-endo</b> |             |             |             |
| Rh               | 9.77442700  | 5.12236300  | 25.54632400 |
| C                | 11.36706600 | 6.93951300  | 28.08358300 |
| O                | 9.14011500  | 1.18126900  | 27.10060800 |
| N                | 9.82265600  | 3.01219900  | 26.01802600 |
| P                | 10.88705600 | 5.28135100  | 27.49118800 |
| N                | 11.69293300 | 5.20773600  | 24.57031000 |
| O                | 13.85787700 | 4.92414400  | 24.07504700 |
| C                | 12.65233700 | 7.40617200  | 27.75876600 |
| H                | 13.36463500 | 6.75837300  | 27.26198600 |
| C                | 13.02747900 | 8.71138600  | 28.07448900 |
| H                | 14.02340300 | 9.05724200  | 27.81618500 |
| C                | 9.14117000  | 4.18223800  | 31.05976200 |
| H                | 9.06644300  | 4.59460700  | 32.06068300 |
| C                | 9.84296400  | 4.88393100  | 30.07626600 |
| H                | 10.31937700 | 5.82052300  | 30.33615700 |
| C                | 9.95197400  | 4.38346000  | 28.77707500 |
| C                | 10.46986700 | 7.80348300  | 28.73450200 |
| H                | 9.47800400  | 7.47089000  | 29.01494000 |
| C                | 10.85555000 | 9.10478400  | 29.05399300 |
| H                | 10.15507700 | 9.75733400  | 29.56542500 |
| C                | 12.13124900 | 9.56371400  | 28.72069500 |
| H                | 12.42614700 | 10.57881200 | 28.96781000 |
| C                | 8.55065200  | 2.95992600  | 30.75336600 |
| H                | 8.00254100  | 2.40864500  | 31.51013700 |
| C                | 8.67129900  | 2.43408700  | 29.46813700 |
| H                | 8.22296500  | 1.47740400  | 29.23069600 |
| C                | 9.46549900  | 2.48516000  | 27.14311700 |
| C                | 9.36418000  | 3.12830300  | 28.46699200 |
| C                | 9.08358300  | 0.81380600  | 25.68460900 |
| H                | 8.02890400  | 0.77891600  | 25.39948600 |
| H                | 9.52962100  | -0.17438500 | 25.58279700 |
| C                | 11.29978300 | 1.59619700  | 24.57975700 |
| H                | 11.76210200 | 2.54048100  | 24.27724700 |
| C                | 9.85383300  | 1.94415700  | 24.98600000 |
| H                | 9.32137600  | 2.31573600  | 24.11140800 |
| C                | 12.12271100 | 0.99946200  | 25.72589500 |
| H                | 11.74805000 | 0.01132600  | 26.01543000 |
| H                | 12.11777500 | 1.64088100  | 26.61076400 |
| H                | 13.16430800 | 0.87547300  | 25.41523600 |
| C                | 12.46525200 | 4.35499300  | 27.42846200 |
| C                | 11.28315600 | 0.66864100  | 23.35978300 |

|   |             |             |             |
|---|-------------|-------------|-------------|
| H | 10.74050900 | 1.12246200  | 22.52328300 |
| H | 10.80428000 | -0.28961500 | 23.59277200 |
| H | 12.30401000 | 0.45507200  | 23.02689600 |
| C | 12.92040700 | 3.76366600  | 28.61260200 |
| H | 12.32895100 | 3.84070200  | 29.51674600 |
| C | 14.13083700 | 3.07195800  | 28.65022100 |
| H | 14.45926800 | 2.61647000  | 29.57876700 |
| C | 14.90846900 | 2.97049600  | 27.49861700 |
| H | 15.84927100 | 2.43051700  | 27.51557200 |
| C | 14.47361000 | 3.56154300  | 26.31662900 |
| H | 15.07067900 | 3.47787100  | 25.41777200 |
| C | 13.25271500 | 4.25313200  | 26.26407300 |
| C | 12.86044900 | 4.82611800  | 24.96941800 |
| C | 13.26413100 | 5.31901000  | 22.80544500 |
| H | 13.32133400 | 4.45969200  | 22.13362300 |
| H | 13.86018900 | 6.13889000  | 22.40567200 |
| C | 11.81723300 | 5.70183800  | 23.16953300 |
| H | 11.11725500 | 5.13566400  | 22.55780000 |
| C | 11.49044300 | 7.19985000  | 23.04030200 |
| H | 10.45038400 | 7.30734900  | 23.34902800 |
| C | 11.57046200 | 7.61951300  | 21.56843900 |
| H | 10.92631900 | 6.98885000  | 20.94598300 |
| H | 12.59235800 | 7.55200900  | 21.17789100 |
| H | 11.24131400 | 8.65706600  | 21.45149700 |
| C | 12.36009700 | 8.07882800  | 23.94159100 |
| H | 13.42025700 | 8.02280900  | 23.66758100 |
| H | 12.26564100 | 7.79256100  | 24.99286600 |
| H | 12.05603000 | 9.12707100  | 23.85363900 |
| C | 8.98907800  | 7.15799400  | 25.35944500 |
| H | 9.63833600  | 7.98825800  | 25.62133900 |
| H | 8.57372200  | 7.15025600  | 24.35646700 |
| C | 8.32887500  | 6.48865000  | 26.41935400 |
| H | 8.56153900  | 6.77642800  | 27.43755100 |
| C | 7.65043100  | 5.26081000  | 26.24046400 |
| O | 9.05648800  | 4.51341700  | 23.62437400 |
| C | 8.64243600  | 5.15113200  | 22.59190200 |
| O | 8.20417500  | 6.30369100  | 22.50163800 |
| O | 8.72847600  | 4.35361700  | 21.47581200 |
| C | 8.26435400  | 4.94572000  | 20.25744100 |
| H | 8.85353800  | 5.82941800  | 19.99516100 |
| H | 8.38736000  | 4.17992300  | 19.48917300 |
| H | 7.21059200  | 5.23049800  | 20.33027700 |
| H | 7.47621500  | 4.70921800  | 27.16251600 |
| C | 6.66083500  | 4.94899600  | 25.15141500 |

|                 |             |             |             |
|-----------------|-------------|-------------|-------------|
| H               | 5.65434400  | 5.10625300  | 25.56276500 |
| H               | 6.78237100  | 5.58649700  | 24.27677600 |
| H               | 6.72525200  | 3.90341700  | 24.83900600 |
| <b>TS-iso-1</b> |             |             |             |
| Rh              | 10.39559300 | 5.05116700  | 25.18076700 |
| C               | 11.00526500 | 7.12188800  | 27.96873900 |
| O               | 9.61453300  | 1.12330200  | 26.71346600 |
| N               | 10.63202200 | 2.92197100  | 25.85352600 |
| P               | 10.91469900 | 5.42141900  | 27.32799000 |
| N               | 12.33457000 | 5.35933900  | 24.71474900 |
| O               | 14.51676100 | 4.94231400  | 24.61038400 |
| C               | 12.25861700 | 7.73034800  | 28.13574700 |
| H               | 13.16952000 | 7.16295800  | 27.98268200 |
| C               | 12.33995200 | 9.07443900  | 28.50141100 |
| H               | 13.31412000 | 9.53594000  | 28.62957700 |
| C               | 8.35258900  | 4.27228900  | 30.34354200 |
| H               | 7.96974800  | 4.71788900  | 31.25594600 |
| C               | 9.24638400  | 4.99212100  | 29.54737000 |
| H               | 9.55044800  | 5.98286900  | 29.86033300 |
| C               | 9.75553200  | 4.45195400  | 28.36300000 |
| C               | 9.83767400  | 7.87686200  | 28.16745500 |
| H               | 8.86255400  | 7.41990700  | 28.04504900 |
| C               | 9.92667200  | 9.21622900  | 28.54188500 |
| H               | 9.01848600  | 9.78829000  | 28.70421200 |
| C               | 11.17686400 | 9.81822600  | 28.70641300 |
| H               | 11.24282900 | 10.86278900 | 28.99482000 |
| C               | 7.96201100  | 2.99174200  | 29.96369500 |
| H               | 7.26421400  | 2.42545500  | 30.57166800 |
| C               | 8.47931200  | 2.42699200  | 28.79943900 |
| H               | 8.19060900  | 1.42380700  | 28.51186100 |
| C               | 9.91194000  | 2.43389500  | 26.80393400 |
| C               | 9.37637200  | 3.13469700  | 27.98696300 |
| C               | 10.06945800 | 0.68403000  | 25.39628200 |
| H               | 9.18601200  | 0.57511800  | 24.76336100 |
| H               | 10.55726200 | -0.28191500 | 25.52224200 |
| C               | 12.50708300 | 1.51051600  | 25.00273100 |
| H               | 13.01800700 | 2.45292800  | 24.77982000 |
| C               | 10.99803300 | 1.82176000  | 24.93315300 |
| H               | 10.76037300 | 2.12925600  | 23.91374400 |
| C               | 12.95796800 | 1.03543700  | 26.38705100 |
| H               | 12.52284000 | 0.06140200  | 26.63691400 |
| H               | 12.68129300 | 1.74641200  | 27.16998100 |
| H               | 14.04599300 | 0.92237200  | 26.41103900 |
| C               | 12.54198400 | 4.68329000  | 27.71459400 |



|   |             |             |             |
|---|-------------|-------------|-------------|
| C | 12.88542600 | 0.50740700  | 23.90792600 |
| H | 12.60306700 | 0.87803600  | 22.91612700 |
| H | 12.38993000 | -0.45833800 | 24.06035100 |
| H | 13.96540100 | 0.32816400  | 23.90842700 |
| C | 12.78677000 | 4.26584700  | 29.02586800 |
| H | 12.01515600 | 4.38219000  | 29.77884400 |
| C | 14.00934400 | 3.69314100  | 29.37824500 |
| H | 14.17606600 | 3.36875500  | 30.40031300 |
| C | 15.00566200 | 3.53656900  | 28.41602700 |
| H | 15.95700600 | 3.08610500  | 28.67869600 |
| C | 14.77902100 | 3.95385100  | 27.10801500 |
| H | 15.54894700 | 3.82630300  | 26.35797600 |
| C | 13.55163100 | 4.52987900  | 26.74144800 |
| C | 13.39698600 | 4.95883100  | 25.34804600 |
| C | 14.11056600 | 5.16876500  | 23.22339000 |
| H | 14.04653200 | 4.19141300  | 22.73800800 |
| H | 14.88194200 | 5.77504600  | 22.75334900 |
| C | 12.75063000 | 5.85554100  | 23.36648200 |
| H | 12.03539200 | 5.48880000  | 22.63123700 |
| C | 12.81725200 | 7.39840500  | 23.30668000 |
| H | 11.81196500 | 7.76466400  | 23.51457000 |
| C | 13.17715100 | 7.83885000  | 21.88205700 |
| H | 12.48696400 | 7.40865800  | 21.14785200 |
| H | 14.19447600 | 7.54117500  | 21.60449600 |
| H | 13.12077500 | 8.92889100  | 21.80055100 |
| C | 13.75996800 | 8.01214300  | 24.34685700 |
| H | 14.80008500 | 7.70617000  | 24.19017500 |
| H | 13.47007600 | 7.74039000  | 25.36670600 |
| H | 13.72502700 | 9.10413800  | 24.27826000 |
| C | 9.79371400  | 6.96096900  | 24.65616100 |
| H | 10.39054800 | 7.71094300  | 25.17739200 |
| H | 9.91679100  | 7.03399700  | 23.57398000 |
| C | 8.38164200  | 6.93913200  | 25.06273200 |
| H | 8.15451600  | 7.16637600  | 26.10294400 |
| C | 7.35767900  | 6.59916200  | 24.25324500 |
| O | 9.95686700  | 4.43707000  | 23.18736600 |
| C | 8.83995200  | 3.81254800  | 23.31750600 |
| O | 8.23905100  | 3.65214800  | 24.39546000 |
| O | 8.36075600  | 3.32744500  | 22.14926300 |
| C | 7.10604400  | 2.63205400  | 22.22795900 |
| H | 6.88199500  | 2.31301300  | 21.20920000 |
| H | 7.18148400  | 1.76011700  | 22.88309100 |
| H | 6.31529800  | 3.29292100  | 22.59315300 |
| H | 7.57300200  | 6.36613500  | 23.20992700 |

|                 |             |             |             |
|-----------------|-------------|-------------|-------------|
| C               | 5.92745200  | 6.50501900  | 24.67558100 |
| H               | 5.29188800  | 7.17730300  | 24.08427200 |
| H               | 5.54133900  | 5.49060700  | 24.51067200 |
| H               | 5.80179400  | 6.75279000  | 25.73439500 |
| <b>IM-iso-1</b> |             |             |             |
| Rh              | 10.44772900 | 4.89672500  | 25.15039600 |
| C               | 10.71325500 | 6.93797200  | 27.93758300 |
| O               | 9.96544800  | 0.86587100  | 26.52115800 |
| N               | 10.79811400 | 2.77779500  | 25.71187600 |
| P               | 10.86860200 | 5.25005800  | 27.28973400 |
| N               | 12.42587000 | 5.26245800  | 24.73128600 |
| O               | 14.60969500 | 4.81875400  | 24.68852800 |
| C               | 11.86054100 | 7.69203700  | 28.22181800 |
| H               | 12.84421500 | 7.23984900  | 28.16156000 |
| C               | 11.73750200 | 9.03364200  | 28.58655100 |
| H               | 12.62888400 | 9.61239400  | 28.80776300 |
| C               | 8.35686400  | 3.79367300  | 30.20495900 |
| H               | 7.91078400  | 4.18311800  | 31.11432300 |
| C               | 9.18527800  | 4.61506700  | 29.43703600 |
| H               | 9.37647400  | 5.62804200  | 29.76838100 |
| C               | 9.77344100  | 4.14779300  | 28.25812400 |
| C               | 9.44594300  | 7.53889700  | 28.01426800 |
| H               | 8.55503900  | 6.96284700  | 27.78902400 |
| C               | 9.33106100  | 8.87576800  | 28.38808200 |
| H               | 8.34841500  | 9.33216600  | 28.45413700 |
| C               | 10.47633300 | 9.62557100  | 28.67119000 |
| H               | 10.38438700 | 10.66880300 | 28.95738700 |
| C               | 8.11183300  | 2.48466700  | 29.80110700 |
| H               | 7.46746400  | 1.83859600  | 30.38813000 |
| C               | 8.70251700  | 1.99691400  | 28.63708100 |
| H               | 8.51893300  | 0.97608900  | 28.32615100 |
| C               | 10.13272400 | 2.19576800  | 26.65163200 |
| C               | 9.53426400  | 2.80784600  | 27.85201400 |
| C               | 10.43521200 | 0.51983600  | 25.18073000 |
| H               | 9.55260400  | 0.37898000  | 24.55154900 |
| H               | 10.99079000 | -0.41383200 | 25.25609200 |
| C               | 12.80046200 | 1.54836900  | 24.85845800 |
| H               | 13.24229100 | 2.53197100  | 24.67637300 |
| C               | 11.27309900 | 1.74202900  | 24.76380000 |
| H               | 11.01856100 | 2.06332800  | 23.75188800 |
| C               | 13.25985000 | 1.06895500  | 26.23909000 |
| H               | 12.90676300 | 0.05343400  | 26.44996000 |
| H               | 12.90730000 | 1.72872800  | 27.03648200 |
| H               | 14.35303700 | 1.05133700  | 26.28508400 |

|   |             |             |             |
|---|-------------|-------------|-------------|
| C | 12.54562300 | 4.68831600  | 27.75473400 |
| C | 13.28120300 | 0.61277200  | 23.74437100 |
| H | 12.98571800 | 0.98642500  | 22.75767300 |
| H | 12.86789900 | -0.39571500 | 23.86093100 |
| H | 14.37237100 | 0.52637300  | 23.76196600 |
| C | 12.77241800 | 4.35982100  | 29.09564900 |
| H | 11.96662000 | 4.45256200  | 29.81525600 |
| C | 14.01931600 | 3.90309200  | 29.52191400 |
| H | 14.17015500 | 3.64801400  | 30.56582400 |
| C | 15.05951100 | 3.77048300  | 28.60381900 |
| H | 16.03136700 | 3.40912600  | 28.92306500 |
| C | 14.85134400 | 4.09794500  | 27.26778200 |
| H | 15.65709000 | 3.98978800  | 26.55338500 |
| C | 13.60052400 | 4.56083700  | 26.82570300 |
| C | 13.47447700 | 4.89767800  | 25.40314500 |
| C | 14.22962400 | 4.95607900  | 23.28400900 |
| H | 14.16065000 | 3.94982100  | 22.86238000 |
| H | 15.01446700 | 5.52167500  | 22.78608000 |
| C | 12.87748600 | 5.66785700  | 23.36439100 |
| H | 12.17044500 | 5.27479300  | 22.63213000 |
| C | 12.97816700 | 7.20377900  | 23.21243400 |
| H | 11.98435100 | 7.60713000  | 23.40802300 |
| C | 13.33981300 | 7.54868600  | 21.76229600 |
| H | 12.62830100 | 7.10185000  | 21.05905200 |
| H | 14.34317900 | 7.19734800  | 21.49686800 |
| H | 13.32258100 | 8.63337000  | 21.61728300 |
| C | 13.94334100 | 7.85626200  | 24.20786800 |
| H | 14.97470200 | 7.51645200  | 24.06564600 |
| H | 13.65365400 | 7.65602100  | 25.24437600 |
| H | 13.93349400 | 8.94218200  | 24.07054700 |
| C | 9.89053700  | 6.83693200  | 24.59245600 |
| H | 10.46344800 | 7.53416400  | 25.20941200 |
| H | 10.21916400 | 6.90074100  | 23.55241100 |
| C | 8.43432200  | 7.07652000  | 24.67609600 |
| H | 8.00160400  | 7.17850700  | 25.67084800 |
| C | 7.60924000  | 7.14383900  | 23.61843300 |
| O | 9.46711600  | 4.21491700  | 23.23957800 |
| C | 8.41852900  | 4.06277000  | 23.93336600 |
| O | 8.42529600  | 4.29790300  | 25.19169000 |
| O | 7.31225300  | 3.64559500  | 23.32450900 |
| C | 6.13460600  | 3.49461200  | 24.14922000 |
| H | 5.33569500  | 3.21487100  | 23.46307200 |
| H | 6.28705900  | 2.70603600  | 24.89005900 |
| H | 5.89269200  | 4.43381400  | 24.64919300 |

|   |            |            |             |
|---|------------|------------|-------------|
| H | 8.03205200 | 7.03149400 | 22.61847800 |
| C | 6.12560100 | 7.34910700 | 23.69488400 |
| H | 5.81447100 | 8.25723100 | 23.16105400 |
| H | 5.58652900 | 6.51540700 | 23.22535000 |
| H | 5.78453800 | 7.43164200 | 24.73232000 |

**IM-iso-2**

|    |             |             |             |
|----|-------------|-------------|-------------|
| Rh | 10.44585300 | 4.83641600  | 24.98562800 |
| C  | 10.40617600 | 6.86329100  | 27.82894900 |
| O  | 10.02332200 | 0.77707500  | 26.28472300 |
| N  | 10.83330400 | 2.72721300  | 25.54829700 |
| P  | 10.70847300 | 5.20608300  | 27.15147200 |
| N  | 12.43028000 | 5.21331100  | 24.65978500 |
| O  | 14.62737500 | 4.85942700  | 24.76657600 |
| C  | 11.49664400 | 7.71729200  | 28.05970700 |
| H  | 12.51041100 | 7.36775200  | 27.89695500 |
| C  | 11.27972200 | 9.01710100  | 28.51458800 |
| H  | 12.12737800 | 9.67132800  | 28.69308700 |
| C  | 8.21253100  | 3.54270600  | 29.98084600 |
| H  | 7.74472700  | 3.88552200  | 30.89803300 |
| C  | 9.02359100  | 4.41695900  | 29.25465000 |
| H  | 9.17719400  | 5.41904800  | 29.63244000 |
| C  | 9.64254300  | 4.01813900  | 28.06476100 |
| C  | 9.09958400  | 7.33224100  | 28.03622100 |
| H  | 8.24843000  | 6.69356400  | 27.83275700 |
| C  | 8.89310400  | 8.62358500  | 28.52085000 |
| H  | 7.88070400  | 8.97228200  | 28.69746700 |
| C  | 9.97936600  | 9.46799900  | 28.75570600 |
| H  | 9.81399300  | 10.47577200 | 29.12426200 |
| C  | 8.01118200  | 2.24365500  | 29.52560600 |
| H  | 7.37702800  | 1.55718500  | 30.07677200 |
| C  | 8.64087400  | 1.81758800  | 28.35884200 |
| H  | 8.50265100  | 0.80125300  | 28.01215400 |
| C  | 10.13380700 | 2.11025000  | 26.43883600 |
| C  | 9.46177600  | 2.68125500  | 27.61883400 |
| C  | 10.59825800 | 0.46366500  | 24.97785000 |
| H  | 9.76842200  | 0.30408700  | 24.28456300 |
| H  | 11.17741300 | -0.45246700 | 25.08383700 |
| C  | 12.94259500 | 1.57164400  | 24.87003100 |
| H  | 13.36833100 | 2.56605700  | 24.71817100 |
| C  | 11.42404500 | 1.71587000  | 24.63822400 |
| H  | 11.24937500 | 2.03264300  | 23.60844500 |
| C  | 13.29615800 | 1.12040700  | 26.29066500 |
| H  | 12.94058600 | 0.10378800  | 26.49127400 |
| H  | 12.87343900 | 1.78891700  | 27.04576700 |

|   |             |             |             |
|---|-------------|-------------|-------------|
| H | 14.38251400 | 1.11975400  | 26.42323300 |
| C | 12.39509300 | 4.77205000  | 27.71738500 |
| C | 13.54792200 | 0.64433900  | 23.81109600 |
| H | 13.32435500 | 0.99906200  | 22.79883200 |
| H | 13.16109200 | -0.37703600 | 23.90311300 |
| H | 14.63593700 | 0.59683200  | 23.92168800 |
| C | 12.56833400 | 4.51992500  | 29.08310000 |
| H | 11.72085100 | 4.59562900  | 29.75488700 |
| C | 13.81368200 | 4.16251000  | 29.59729400 |
| H | 13.92067800 | 3.96521600  | 30.65899500 |
| C | 14.90947900 | 4.05282400  | 28.74280300 |
| H | 15.88198200 | 3.76679100  | 29.12934400 |
| C | 14.75671000 | 4.30860800  | 27.38453400 |
| H | 15.60718300 | 4.22140000  | 26.72123000 |
| C | 13.50723700 | 4.67480800  | 26.85351000 |
| C | 13.45031000 | 4.93512700  | 25.41007800 |
| C | 14.33056800 | 4.87639700  | 23.33742300 |
| H | 14.35772700 | 3.84269000  | 22.98348300 |
| H | 15.10825000 | 5.45998000  | 22.84943900 |
| C | 12.93024500 | 5.49656900  | 23.27703200 |
| H | 12.29022200 | 4.96903800  | 22.56770000 |
| C | 12.93556900 | 7.00432100  | 22.94072800 |
| H | 11.90131100 | 7.34282100  | 22.99586900 |
| C | 13.40398900 | 7.20755600  | 21.49429100 |
| H | 12.80754400 | 6.60953400  | 20.79625800 |
| H | 14.45653600 | 6.93526800  | 21.35978000 |
| H | 13.29938100 | 8.25972600  | 21.21140400 |
| C | 13.75631100 | 7.83932900  | 23.92837700 |
| H | 14.81594500 | 7.56108100  | 23.91880000 |
| H | 13.38376700 | 7.73483400  | 24.95236900 |
| H | 13.69257600 | 8.89892800  | 23.66111900 |
| C | 9.90932000  | 6.75693600  | 24.36627000 |
| H | 10.60511500 | 7.49027700  | 24.78218900 |
| H | 10.09096900 | 6.64297900  | 23.29123900 |
| C | 8.50481600  | 7.15584300  | 24.60500900 |
| H | 7.72808600  | 6.50365900  | 24.20650200 |
| C | 8.12571100  | 8.26890200  | 25.25178800 |
| O | 9.63223700  | 4.06430400  | 23.01902900 |
| C | 8.55375300  | 3.85489600  | 23.64868500 |
| O | 8.43474400  | 4.18970700  | 24.87950300 |
| O | 7.54648800  | 3.27472300  | 23.00228100 |
| C | 6.33889200  | 3.03135700  | 23.76047500 |
| H | 5.65532300  | 2.54524400  | 23.06509400 |
| H | 6.54644500  | 2.37439700  | 24.60811600 |

|   |            |            |             |
|---|------------|------------|-------------|
| H | 5.91171900 | 3.97254200 | 24.11316100 |
| H | 8.89592800 | 8.93072900 | 25.64685600 |
| C | 6.70609100 | 8.68618200 | 25.48945900 |
| H | 6.49815000 | 8.78218100 | 26.56367300 |
| H | 6.49512600 | 9.66854100 | 25.04630500 |
| H | 5.99835100 | 7.96362900 | 25.06953100 |

**TS-iso-2**

|    |             |             |             |
|----|-------------|-------------|-------------|
| Rh | 10.37491200 | 5.02991300  | 25.07309400 |
| C  | 10.96242100 | 7.13923700  | 27.86718400 |
| O  | 9.57824600  | 1.13489800  | 26.62753600 |
| N  | 10.63366900 | 2.92355500  | 25.79293200 |
| P  | 10.85669700 | 5.43734900  | 27.23048500 |
| N  | 12.31718500 | 5.38793800  | 24.65605000 |
| O  | 14.49531200 | 4.95157500  | 24.56165200 |
| C  | 12.22203000 | 7.74691800  | 27.98489100 |
| H  | 13.12581600 | 7.17830800  | 27.79858500 |
| C  | 12.31958000 | 9.09174800  | 28.34306900 |
| H  | 13.29889000 | 9.55152500  | 28.43186000 |
| C  | 8.26801800  | 4.29364900  | 30.22940200 |
| H  | 7.87726500  | 4.74045000  | 31.13783900 |
| C  | 9.17135500  | 5.01162000  | 29.44215500 |
| H  | 9.47497300  | 6.00066200  | 29.76007200 |
| C  | 9.69099900  | 4.47119800  | 28.26266900 |
| C  | 9.80591300  | 7.89684100  | 28.11151400 |
| H  | 8.82751600  | 7.44034700  | 28.03101700 |
| C  | 9.91057400  | 9.23714200  | 28.47916400 |
| H  | 9.00973400  | 9.80967000  | 28.67688100 |
| C  | 11.16664300 | 9.83824800  | 28.59161000 |
| H  | 11.24547200 | 10.88344500 | 28.87439700 |
| C  | 7.87816300  | 3.01405200  | 29.84610400 |
| H  | 7.17226100  | 2.44977300  | 30.44650100 |
| C  | 8.40941400  | 2.44667100  | 28.68951300 |
| H  | 8.12527300  | 1.44232800  | 28.40139300 |
| C  | 9.87885200  | 2.44380600  | 26.72168700 |
| C  | 9.31711700  | 3.15216000  | 27.88711200 |
| C  | 10.07064600 | 0.68911000  | 25.32578500 |
| H  | 9.20735000  | 0.59687300  | 24.66280700 |
| H  | 10.53708600 | -0.28527100 | 25.46618600 |
| C  | 12.53247800 | 1.48386500  | 25.03887100 |
| H  | 13.06620100 | 2.41662100  | 24.82833300 |
| C  | 11.03206600 | 1.81199000  | 24.89735500 |
| H  | 10.84678200 | 2.11220900  | 23.86530200 |
| C  | 12.91595600 | 1.01829000  | 26.44617500 |
| H  | 12.45269900 | 0.05552700  | 26.68889500 |

|   |             |             |             |
|---|-------------|-------------|-------------|
| H | 12.62137100 | 1.74359200  | 27.20895000 |
| H | 13.99968300 | 0.88566800  | 26.51643200 |
| C | 12.47975700 | 4.69068300  | 27.63914200 |
| C | 12.94633900 | 0.46302000  | 23.97354200 |
| H | 12.70910200 | 0.82221100  | 22.96588000 |
| H | 12.43717400 | -0.49670500 | 24.11826800 |
| H | 14.02380400 | 0.27520800  | 24.02157900 |
| C | 12.70797600 | 4.28552800  | 28.95705400 |
| H | 11.93048300 | 4.41647000  | 29.70151300 |
| C | 13.92194000 | 3.70557300  | 29.32813200 |
| H | 14.07524400 | 3.39206900  | 30.35569500 |
| C | 14.92644300 | 3.52709100  | 28.37839600 |
| H | 15.87039200 | 3.07022300  | 28.65618200 |
| C | 14.71714900 | 3.93232800  | 27.06369600 |
| H | 15.49355100 | 3.79156200  | 26.32251400 |
| C | 13.49966500 | 4.51690500  | 26.67970100 |
| C | 13.36869800 | 4.95869100  | 25.28905700 |
| C | 14.10136600 | 5.23758100  | 23.17951500 |
| H | 14.00588200 | 4.27960700  | 22.66149400 |
| H | 14.89236400 | 5.83493200  | 22.73083700 |
| C | 12.76503800 | 5.95951400  | 23.35095300 |
| H | 12.04878200 | 5.67403000  | 22.58125900 |
| C | 12.88947300 | 7.50019700  | 23.41784600 |
| H | 11.91496000 | 7.88120500  | 23.72633500 |
| C | 13.18164300 | 8.04661500  | 22.01552200 |
| H | 12.41846300 | 7.72555200  | 21.29815700 |
| H | 14.15695100 | 7.71150600  | 21.64469600 |
| H | 13.19351000 | 9.14093700  | 22.03121400 |
| C | 13.91694900 | 7.99504000  | 24.44211900 |
| H | 14.93569500 | 7.68255500  | 24.18999000 |
| H | 13.68679100 | 7.64313500  | 25.45215300 |
| H | 13.90617600 | 9.08935700  | 24.47039600 |
| C | 9.73059300  | 6.90222000  | 24.44435300 |
| H | 10.07843400 | 7.67913100  | 25.12792200 |
| H | 10.11775800 | 7.05316400  | 23.43680700 |
| C | 8.27655200  | 6.68588200  | 24.45496600 |
| H | 7.85322700  | 6.17877500  | 23.58955100 |
| C | 7.44033800  | 6.99923800  | 25.46621000 |
| O | 10.00522000 | 4.33936500  | 23.09111900 |
| C | 8.89654400  | 3.69909100  | 23.21870900 |
| O | 8.23941300  | 3.62803400  | 24.27516700 |
| O | 8.49562500  | 3.08909800  | 22.08202800 |
| C | 7.26030500  | 2.35849200  | 22.16429300 |
| H | 7.09237100  | 1.95242300  | 21.16604000 |

|   |            |            |             |
|---|------------|------------|-------------|
| H | 7.33569800 | 1.54396100 | 22.88971500 |
| H | 6.43418500 | 3.01802300 | 22.44286200 |
| H | 7.84020300 | 7.52320100 | 26.33067200 |
| C | 5.97774200 | 6.68890400 | 25.48917800 |
| H | 5.72695900 | 6.05742900 | 26.35265000 |
| H | 5.37671500 | 7.60205200 | 25.59209000 |
| H | 5.66194800 | 6.16723800 | 24.58036000 |

***E-TS2a***

|    |             |             |             |
|----|-------------|-------------|-------------|
| Rh | 9.96421500  | 5.05385100  | 25.62901400 |
| C  | 11.12437100 | 6.65781800  | 28.50753100 |
| O  | 9.10889600  | 0.97228000  | 26.83529700 |
| N  | 9.77343800  | 2.90865400  | 25.92639800 |
| P  | 10.82135000 | 5.05061900  | 27.68142300 |
| N  | 12.04494400 | 4.99105200  | 24.85415800 |
| O  | 14.23044700 | 4.57466000  | 24.55679300 |
| C  | 12.39089400 | 7.24853700  | 28.37629000 |
| H  | 13.19742400 | 6.71229200  | 27.88904700 |
| C  | 12.62506200 | 8.53161100  | 28.87251300 |
| H  | 13.61018700 | 8.97511200  | 28.76449700 |
| C  | 8.87599400  | 3.60093700  | 31.02650700 |
| H  | 8.74424500  | 3.91882200  | 32.05584100 |
| C  | 9.63499900  | 4.38365500  | 30.15531500 |
| H  | 10.09350300 | 5.28885300  | 30.53122800 |
| C  | 9.82009100  | 4.01396200  | 28.81887700 |
| C  | 10.09583300 | 7.37970500  | 29.13670400 |
| H  | 9.10412700  | 6.95398600  | 29.23405400 |
| C  | 10.33941200 | 8.65582500  | 29.64270100 |
| H  | 9.53636600  | 9.19719400  | 30.13086800 |
| C  | 11.60230700 | 9.23650000  | 29.50920000 |
| H  | 11.78694500 | 10.23304200 | 29.89862300 |
| C  | 8.30069100  | 2.41721600  | 30.57216700 |
| H  | 7.70575300  | 1.80147800  | 31.23874500 |
| C  | 8.50011100  | 2.01571300  | 29.25415900 |
| H  | 8.06603900  | 1.08911100  | 28.90017900 |
| C  | 9.40667000  | 2.28021500  | 26.99170000 |
| C  | 9.25185400  | 2.79792100  | 28.36324600 |
| C  | 9.11728300  | 0.70781900  | 25.40071400 |
| H  | 8.07768700  | 0.60641100  | 25.07829600 |
| H  | 9.64436600  | -0.23274600 | 25.24079400 |
| C  | 11.25273400 | 1.71332800  | 24.30473500 |
| H  | 11.62690200 | 2.70354100  | 24.03699000 |
| C  | 9.81242000  | 1.94171500  | 24.79972600 |
| H  | 9.23501200  | 2.36900100  | 23.98083400 |
| C  | 12.17126300 | 1.12372800  | 25.37915400 |



|   |             |             |             |
|---|-------------|-------------|-------------|
| H | 11.89875100 | 0.08956300  | 25.61926900 |
| H | 12.14051500 | 1.70754500  | 26.30236200 |
| H | 13.20826800 | 1.11647200  | 25.02808800 |
| C | 12.47414100 | 4.23313100  | 27.80343700 |
| C | 11.24101600 | 0.85387900  | 23.03659700 |
| H | 10.62026100 | 1.30773600  | 22.25603300 |
| H | 10.85248800 | -0.15196500 | 23.23548100 |
| H | 12.25570900 | 0.74241800  | 22.64014100 |
| C | 12.83302500 | 3.72884900  | 29.06166700 |
| H | 12.13543400 | 3.79688900  | 29.88706700 |
| C | 14.07422000 | 3.13695000  | 29.28536800 |
| H | 14.31627400 | 2.75376400  | 30.27155500 |
| C | 14.99258500 | 3.04279100  | 28.24184700 |
| H | 15.96209100 | 2.58132500  | 28.39902800 |
| C | 14.65993900 | 3.54214700  | 26.98826900 |
| H | 15.36637000 | 3.46418700  | 26.17220600 |
| C | 13.40896500 | 4.13922500  | 26.74801300 |
| C | 13.15455100 | 4.60459700  | 25.37677200 |
| C | 13.74918100 | 4.87046200  | 23.21592100 |
| H | 13.82016600 | 3.95191700  | 22.62827100 |
| H | 14.40669700 | 5.62792100  | 22.78806800 |
| C | 12.29618500 | 5.33441700  | 23.43072600 |
| H | 11.60090100 | 4.75039600  | 22.82799100 |
| C | 12.03430800 | 6.82302400  | 23.14443200 |
| H | 10.98357400 | 6.98457100  | 23.38931600 |
| C | 12.20782500 | 7.10901000  | 21.64937000 |
| H | 11.56926300 | 6.45025100  | 21.05045000 |
| H | 13.24465000 | 6.96474800  | 21.32372700 |
| H | 11.93333300 | 8.14468900  | 21.42306700 |
| C | 12.87449600 | 7.75573000  | 24.01977500 |
| H | 13.94739900 | 7.63602200  | 23.82829300 |
| H | 12.69703000 | 7.56854300  | 25.08374200 |
| H | 12.62154300 | 8.80164200  | 23.81616900 |
| C | 9.16269600  | 7.71224500  | 24.89510900 |
| H | 10.00950600 | 8.38492300  | 24.98111600 |
| H | 8.91623300  | 7.34435800  | 23.90690200 |
| C | 8.86118200  | 6.89639000  | 26.01794100 |
| H | 9.11624200  | 7.32346300  | 26.97967900 |
| C | 8.00522300  | 5.73630300  | 26.00552100 |
| C | 7.21053600  | 5.34151000  | 27.22628900 |
| H | 6.23434700  | 5.84557300  | 27.23166200 |
| H | 7.72429100  | 5.60658800  | 28.15293800 |
| H | 7.01909600  | 4.26362500  | 27.24867900 |
| O | 7.92892300  | 6.03915300  | 22.65323000 |

|   |            |             |             |
|---|------------|-------------|-------------|
| C | 8.80862600 | 5.16820500  | 22.62714600 |
| O | 9.43399200 | 4.61116800  | 23.59021900 |
| O | 9.23358000 | 4.65497600  | 21.41851400 |
| C | 8.60377800 | 5.20644100  | 20.25885900 |
| H | 8.77351200 | 6.28505700  | 20.18884500 |
| H | 9.06142900 | 4.70563600  | 19.40322100 |
| H | 7.52574000 | 5.01805000  | 20.26219600 |
| H | 7.48853700 | 5.54781300  | 25.06514400 |
| C | 8.02453900 | 10.89300200 | 28.11710100 |
| C | 8.28817400 | 10.57117100 | 26.78680700 |
| C | 7.50833100 | 9.60381000  | 26.14434900 |
| C | 6.48450100 | 8.94696100  | 26.83402700 |
| C | 6.23330900 | 9.27186500  | 28.16745600 |
| C | 6.99931100 | 10.24486000 | 28.81309100 |
| H | 8.62591800 | 11.64882600 | 28.61271300 |
| H | 9.09088800 | 11.06262700 | 26.24442300 |
| H | 5.89298400 | 8.19150500  | 26.32624700 |
| H | 5.43565800 | 8.76238200  | 28.69945600 |
| H | 6.80076600 | 10.49690200 | 29.85006100 |
| N | 7.84180300 | 9.18730600  | 24.82903400 |
| H | 7.05507400 | 8.78026400  | 24.32761100 |
| H | 8.27153300 | 9.91826500  | 24.26504900 |

**(R)-TS3**

|    |             |            |             |
|----|-------------|------------|-------------|
| Rh | 9.85302200  | 5.18753200 | 25.38282600 |
| C  | 11.46532000 | 7.03276300 | 27.86523000 |
| O  | 9.12899700  | 1.26087400 | 27.13486000 |
| N  | 9.79439000  | 3.04049000 | 25.94563700 |
| P  | 11.00423700 | 5.36955300 | 27.26385800 |
| N  | 11.69516000 | 5.10084400 | 24.30079500 |
| O  | 13.84861300 | 4.86341400 | 23.73052500 |
| C  | 12.78120900 | 7.48854400 | 27.69179900 |
| H  | 13.54413900 | 6.82428300 | 27.30239400 |
| C  | 13.12060000 | 8.80184800 | 28.02037900 |
| H  | 14.14304100 | 9.14029700 | 27.88315900 |
| C  | 9.34726800  | 4.46445900 | 30.93430600 |
| H  | 9.30837700  | 4.93473300 | 31.91167700 |
| C  | 10.04066400 | 5.08937700 | 29.89557600 |
| H  | 10.54030900 | 6.03026800 | 30.08837100 |
| C  | 10.10536300 | 4.51908100 | 28.62081200 |
| C  | 10.49451600 | 7.91707600 | 28.36819300 |
| H  | 9.47021300  | 7.59326500 | 28.51036100 |
| C  | 10.84216200 | 9.22458800 | 28.70285000 |
| H  | 10.08322800 | 9.89208800 | 29.09785500 |
| C  | 12.15404900 | 9.67144800 | 28.52722800 |

|   |             |             |             |
|---|-------------|-------------|-------------|
| H | 12.42056900 | 10.69173200 | 28.78578500 |
| C | 8.71733700  | 3.24306900  | 30.71156500 |
| H | 8.17453200  | 2.74899700  | 31.51072300 |
| C | 8.79040000  | 2.64758400  | 29.45423200 |
| H | 8.30809600  | 1.69391700  | 29.27877700 |
| C | 9.49261100  | 2.56275300  | 27.10330400 |
| C | 9.47320300  | 3.26748100  | 28.39750800 |
| C | 8.99988800  | 0.83770400  | 25.74249000 |
| H | 7.93233500  | 0.78492000  | 25.51223600 |
| H | 9.44537800  | -0.15275900 | 25.65529500 |
| C | 11.13120300 | 1.56945200  | 24.43939100 |
| H | 11.56465200 | 2.50004400  | 24.05958100 |
| C | 9.72575100  | 1.94293000  | 24.95437700 |
| H | 9.12969800  | 2.29565500  | 24.11159300 |
| C | 12.04867700 | 1.02343900  | 25.53845800 |
| H | 11.70115800 | 0.05004300  | 25.90309200 |
| H | 12.11538300 | 1.70460600  | 26.39070700 |
| H | 13.06173000 | 0.88333000  | 25.14878200 |
| C | 12.59497700 | 4.45791900  | 27.18201900 |
| C | 11.01466100 | 0.58778800  | 23.26846900 |
| H | 10.39848700 | 1.00192300  | 22.46262400 |
| H | 10.56354000 | -0.36049000 | 23.58415800 |
| H | 12.00365900 | 0.36120100  | 22.85676500 |
| C | 13.10765000 | 3.92804900  | 28.37250200 |
| H | 12.55484000 | 4.05265300  | 29.29625200 |
| C | 14.32136200 | 3.24211700  | 28.39549100 |
| H | 14.69200000 | 2.83597900  | 29.33115400 |
| C | 15.04996600 | 3.08529500  | 27.21774000 |
| H | 15.99392000 | 2.55021300  | 27.22146700 |
| C | 14.56159900 | 3.61473000  | 26.02758300 |
| H | 15.12053800 | 3.48784700  | 25.10909200 |
| C | 13.33442300 | 4.29810400  | 25.98837200 |
| C | 12.88723300 | 4.78557100  | 24.67536800 |
| C | 13.17644900 | 5.14042800  | 22.46701600 |
| H | 13.21180800 | 4.22732600  | 21.86743000 |
| H | 13.73150400 | 5.93204400  | 21.96373700 |
| C | 11.74422400 | 5.52798500  | 22.87973600 |
| H | 11.00639400 | 4.94298300  | 22.33102200 |
| C | 11.39405000 | 7.01998500  | 22.72301800 |
| H | 10.38120000 | 7.12907400  | 23.11805800 |
| C | 11.36044000 | 7.39427100  | 21.23779100 |
| H | 10.68140000 | 6.73741200  | 20.68352600 |
| H | 12.35249300 | 7.32182800  | 20.77648900 |
| H | 11.01314300 | 8.42489000  | 21.11075700 |

|               |             |             |             |
|---------------|-------------|-------------|-------------|
| C             | 12.31696700 | 7.93633800  | 23.53072400 |
| H             | 13.35327900 | 7.88493000  | 23.17671400 |
| H             | 12.30647100 | 7.67829400  | 24.59421400 |
| H             | 11.99155900 | 8.97784600  | 23.43785800 |
| C             | 9.08146900  | 7.12416200  | 25.39514800 |
| H             | 9.69474900  | 7.89505400  | 25.85466500 |
| H             | 8.67192600  | 7.38709700  | 24.42420000 |
| C             | 8.24683500  | 6.31582600  | 26.26327400 |
| H             | 8.34297400  | 6.40267400  | 27.34181100 |
| C             | 7.04895000  | 5.67929600  | 25.82898300 |
| C             | 6.43327500  | 4.58667300  | 26.65193300 |
| H             | 5.38449700  | 4.42271600  | 26.39215200 |
| H             | 6.51745800  | 4.79374100  | 27.72243600 |
| H             | 6.96951000  | 3.65303200  | 26.44767200 |
| O             | 7.64591900  | 6.31359000  | 22.72891100 |
| C             | 8.34112800  | 5.29584500  | 22.61878700 |
| O             | 8.91699000  | 4.60209900  | 23.52729000 |
| O             | 8.56360200  | 4.74548100  | 21.37346800 |
| C             | 7.92013000  | 5.41009600  | 20.28211900 |
| H             | 8.26493600  | 6.44365400  | 20.18506300 |
| H             | 8.19112200  | 4.84654100  | 19.38687800 |
| H             | 6.83249900  | 5.41000400  | 20.40287300 |
| H             | 6.88350500  | 5.64706500  | 24.75683400 |
| C             | 7.23816500  | 9.81257900  | 28.06521800 |
| C             | 6.77792300  | 9.07861400  | 26.97207100 |
| C             | 5.96911400  | 7.95617900  | 27.18090300 |
| C             | 5.62888300  | 7.56547500  | 28.48194500 |
| C             | 6.09615300  | 8.30452300  | 29.56804500 |
| C             | 6.90431300  | 9.42766100  | 29.36593700 |
| H             | 7.86226000  | 10.68477400 | 27.89755000 |
| H             | 7.04479700  | 9.36513900  | 25.95964800 |
| H             | 5.00507500  | 6.68980900  | 28.63430400 |
| H             | 5.82715500  | 8.00134200  | 30.57539700 |
| H             | 7.26600800  | 9.99973400  | 30.21458800 |
| N             | 5.61429900  | 7.13583600  | 26.08296700 |
| H             | 4.72991400  | 6.64683200  | 26.20067800 |
| H             | 5.62750100  | 7.62756800  | 25.19241800 |
| <b>E-TS2b</b> |             |             |             |
| Rh            | 9.77021000  | 5.04450100  | 25.49892600 |
| C             | 11.19620100 | 6.98366900  | 28.11973900 |
| O             | 9.21157200  | 1.13502200  | 27.20064800 |
| N             | 9.87532700  | 2.95701600  | 26.08009200 |
| P             | 10.85117400 | 5.32188800  | 27.43641900 |
| N             | 11.71932400 | 5.07101200  | 24.45772100 |

|   |             |             |             |
|---|-------------|-------------|-------------|
| O | 13.91299400 | 4.92016300  | 24.00908400 |
| C | 12.45009100 | 7.57253500  | 27.90189800 |
| H | 13.24694900 | 7.00583500  | 27.43351600 |
| C | 12.68213000 | 8.89507400  | 28.28447800 |
| H | 13.65787100 | 9.33859300  | 28.11148000 |
| C | 9.24214500  | 4.21223800  | 31.08771200 |
| H | 9.19661800  | 4.63936400  | 32.08444700 |
| C | 9.90852100  | 4.90313700  | 30.07330600 |
| H | 10.38008000 | 5.84741800  | 30.31117200 |
| C | 9.98529900  | 4.39327800  | 28.77308500 |
| C | 10.17659000 | 7.74418300  | 28.72062900 |
| H | 9.19292000  | 7.31486900  | 28.87508200 |
| C | 10.41677500 | 9.06099700  | 29.10921100 |
| H | 9.62334200  | 9.63403300  | 29.57911700 |
| C | 11.66941300 | 9.64042900  | 28.88984800 |
| H | 11.85353000 | 10.66755200 | 29.18950700 |
| C | 8.64723600  | 2.98285200  | 30.81796500 |
| H | 8.12285900  | 2.44019700  | 31.59764600 |
| C | 8.74125000  | 2.44049200  | 29.53903900 |
| H | 8.30100700  | 1.47419000  | 29.32597000 |
| C | 9.51052100  | 2.45098500  | 27.20929500 |
| C | 9.40412300  | 3.12630800  | 28.51017000 |
| C | 9.20733500  | 0.72509300  | 25.79782400 |
| H | 8.16350500  | 0.64877100  | 25.48108200 |
| H | 9.68478000  | -0.25232200 | 25.73763300 |
| C | 11.43089800 | 1.54361300  | 24.73064100 |
| H | 11.86061600 | 2.49096800  | 24.39369000 |
| C | 9.96339200  | 1.85694700  | 25.08564500 |
| H | 9.44194800  | 2.18437900  | 24.18731900 |
| C | 12.24972400 | 1.03791600  | 25.92270700 |
| H | 11.90595000 | 0.05211800  | 26.25611900 |
| H | 12.19992400 | 1.72363700  | 26.77243700 |
| H | 13.30263700 | 0.93879700  | 25.64144500 |
| C | 12.50914600 | 4.51746400  | 27.40845900 |
| C | 11.48248800 | 0.55939000  | 23.55706700 |
| H | 10.93846500 | 0.94788600  | 22.68886300 |
| H | 11.04181200 | -0.40803300 | 23.82504700 |
| H | 12.51874300 | 0.37686800  | 23.25397900 |
| C | 13.01045000 | 4.04441300  | 28.62875600 |
| H | 12.41560000 | 4.14889100  | 29.52813100 |
| C | 14.26179800 | 3.43712800  | 28.71658700 |
| H | 14.61826000 | 3.07628500  | 29.67608000 |
| C | 15.04390900 | 3.29922300  | 27.57183300 |
| H | 16.01829300 | 2.82445300  | 27.62304200 |

|   |             |             |             |
|---|-------------|-------------|-------------|
| C | 14.56909600 | 3.77183000  | 26.35336700 |
| H | 15.17046200 | 3.66063400  | 25.46029400 |
| C | 13.30558300 | 4.37992800  | 26.24820100 |
| C | 12.90045100 | 4.81709500  | 24.90179700 |
| C | 13.29665400 | 5.12617100  | 22.70620000 |
| H | 13.37330000 | 4.18746100  | 22.15063700 |
| H | 13.86047600 | 5.90467000  | 22.19256300 |
| C | 11.84335500 | 5.50401700  | 23.04309900 |
| H | 11.14045500 | 4.92391600  | 22.44323100 |
| C | 11.50090000 | 6.99697100  | 22.87985100 |
| H | 10.46092700 | 7.08469100  | 23.19903600 |
| C | 11.55423800 | 7.38861300  | 21.40014100 |
| H | 10.89008400 | 6.75183700  | 20.80736800 |
| H | 12.56758900 | 7.30791100  | 20.98929400 |
| H | 11.22961900 | 8.42660000  | 21.26956400 |
| C | 12.37514200 | 7.90823100  | 23.74523700 |
| H | 13.43078100 | 7.85881300  | 23.45291600 |
| H | 12.30368500 | 7.64831000  | 24.80574400 |
| H | 12.05676900 | 8.95076700  | 23.63778900 |
| C | 9.11899400  | 7.84361600  | 25.56720800 |
| C | 8.35089700  | 6.66996500  | 25.33682600 |
| H | 7.91273900  | 6.59405500  | 24.34782400 |
| C | 7.94538700  | 5.70390500  | 26.32799700 |
| C | 6.73003500  | 4.83447300  | 26.10066900 |
| H | 6.78540900  | 3.91984900  | 26.70260800 |
| H | 6.64840700  | 4.54226200  | 25.05035900 |
| H | 5.80567400  | 5.35673100  | 26.38472300 |
| H | 8.06989100  | 5.99674600  | 27.37168000 |
| C | 4.46683600  | 8.17342500  | 25.32988800 |
| C | 5.65959100  | 8.45029100  | 25.99911400 |
| C | 6.66625000  | 9.16597600  | 25.34534500 |
| C | 6.49392100  | 9.58844800  | 24.02367300 |
| C | 5.29851800  | 9.30663900  | 23.36380800 |
| C | 4.28217000  | 8.59856700  | 24.01244300 |
| H | 3.68283700  | 7.62319000  | 25.84111900 |
| H | 5.81293700  | 8.11840000  | 27.02152900 |
| H | 7.29130100  | 10.13042500 | 23.52329300 |
| H | 5.16217600  | 9.64023700  | 22.33962100 |
| H | 3.35395000  | 8.38014000  | 23.49377000 |
| N | 7.92383300  | 9.34394100  | 25.98191100 |
| O | 8.83514200  | 4.26225200  | 23.74713200 |
| C | 8.49309200  | 4.80655700  | 22.63839900 |
| O | 8.53772900  | 5.99136700  | 22.29107700 |
| O | 8.01287400  | 3.84868900  | 21.77054200 |

|   |            |             |             |
|---|------------|-------------|-------------|
| C | 7.60419000 | 4.33424000  | 20.48990500 |
| H | 8.43609000 | 4.80535800  | 19.95689800 |
| H | 7.26048600 | 3.45955200  | 19.93355500 |
| H | 6.78788300 | 5.05799800  | 20.57817100 |
| H | 8.41959800 | 10.17951300 | 25.67607400 |
| H | 7.86143900 | 9.33572100  | 26.99810600 |
| H | 9.55376000 | 8.32216700  | 24.69692500 |
| H | 9.68385200 | 7.95475400  | 26.47844900 |

**(S)-TS3**

|    |             |             |             |
|----|-------------|-------------|-------------|
| Rh | 9.57867500  | 4.86647400  | 25.42379700 |
| C  | 10.96838200 | 7.13562500  | 27.75723000 |
| O  | 9.64284800  | 1.02534400  | 27.57517800 |
| N  | 9.91919400  | 2.78072500  | 26.20409600 |
| P  | 10.68214000 | 5.38756300  | 27.29334800 |
| N  | 11.44628900 | 5.04889900  | 24.39096300 |
| O  | 13.61722800 | 5.05318100  | 23.83430300 |
| C  | 12.25205400 | 7.69132100  | 27.63649500 |
| H  | 13.09355900 | 7.07123600  | 27.35214100 |
| C  | 12.45928700 | 9.04961700  | 27.88160300 |
| H  | 13.45824600 | 9.46339200  | 27.78331800 |
| C  | 9.17517800  | 4.55926200  | 31.04526000 |
| H  | 9.02150800  | 5.10662600  | 31.96987000 |
| C  | 9.73888600  | 5.20764500  | 29.94458000 |
| H  | 10.02926400 | 6.24702100  | 30.03466900 |
| C  | 9.94234400  | 4.53424500  | 28.73692100 |
| C  | 9.89793100  | 7.96975600  | 28.12291100 |
| H  | 8.89557500  | 7.57240000  | 28.21644100 |
| C  | 10.11269000 | 9.32287600  | 28.37828900 |
| H  | 9.27618800  | 9.95028000  | 28.66687200 |
| C  | 11.39276400 | 9.86774800  | 28.25544000 |
| H  | 11.55635000 | 10.92334100 | 28.44986200 |
| C  | 8.82561600  | 3.21404700  | 30.95435500 |
| H  | 8.39035300  | 2.69971100  | 31.80488600 |
| C  | 9.03679200  | 2.52325000  | 29.76331500 |
| H  | 8.76366200  | 1.47806100  | 29.68835500 |
| C  | 9.73639200  | 2.36528200  | 27.41095800 |
| C  | 9.58316300  | 3.16500200  | 28.64164500 |
| C  | 9.57107000  | 0.45396400  | 26.23457500 |
| H  | 8.52777400  | 0.18746200  | 26.04499600 |
| H  | 10.18945100 | -0.44290300 | 26.22100100 |
| C  | 11.50934800 | 1.44897300  | 24.81472600 |
| H  | 11.76256400 | 2.41360300  | 24.36334900 |
| C  | 10.06315000 | 1.59427800  | 25.32724800 |
| H  | 9.39180000  | 1.72114700  | 24.48001300 |

|   |             |             |             |
|---|-------------|-------------|-------------|
| C | 12.51563000 | 1.15748400  | 25.93278900 |
| H | 12.36236400 | 0.15926200  | 26.35827300 |
| H | 12.44784300 | 1.88847500  | 26.74209200 |
| H | 13.53655900 | 1.19207500  | 25.54099000 |
| C | 12.38353900 | 4.68462000  | 27.28765800 |
| C | 11.56732600 | 0.38054900  | 23.71778000 |
| H | 10.88373700 | 0.61843800  | 22.89500600 |
| H | 11.29382300 | -0.60701300 | 24.10829900 |
| H | 12.57947400 | 0.30381500  | 23.30705000 |
| C | 12.94695200 | 4.31353700  | 28.51459700 |
| H | 12.36749300 | 4.41478200  | 29.42443900 |
| C | 14.24864900 | 3.81927200  | 28.59328200 |
| H | 14.65705000 | 3.53349100  | 29.55739900 |
| C | 15.01708600 | 3.70077400  | 27.43658100 |
| H | 16.03081900 | 3.31695300  | 27.48557100 |
| C | 14.47785000 | 4.07435700  | 26.21009700 |
| H | 15.06562700 | 3.97625200  | 25.30622300 |
| C | 13.16325800 | 4.56066600  | 26.11795400 |
| C | 12.66692400 | 4.90364200  | 24.78018400 |
| C | 12.92287700 | 5.18251300  | 22.55970900 |
| H | 13.05357000 | 4.24387500  | 22.01496200 |
| H | 13.39520500 | 5.99625200  | 22.01028200 |
| C | 11.46013900 | 5.44504700  | 22.95707300 |
| H | 10.77519000 | 4.78694700  | 22.42390600 |
| C | 10.98372900 | 6.89848400  | 22.76726500 |
| H | 9.94806700  | 6.91343600  | 23.11120300 |
| C | 10.98774100 | 7.26619900  | 21.27940500 |
| H | 10.41725500 | 6.54006600  | 20.68912500 |
| H | 12.00396000 | 7.30839400  | 20.87062000 |
| H | 10.53440100 | 8.25171400  | 21.13055300 |
| C | 11.77775200 | 7.90227600  | 23.60777500 |
| H | 12.83746600 | 7.92045900  | 23.32640100 |
| H | 11.71099600 | 7.67008700  | 24.67477600 |
| H | 11.38338000 | 8.91355600  | 23.46236000 |
| C | 8.45409000  | 6.60537600  | 25.22172100 |
| H | 8.75684600  | 7.42898800  | 25.86308800 |
| H | 8.28409400  | 6.90442900  | 24.19064500 |
| C | 7.55601700  | 5.59695800  | 25.74808300 |
| H | 6.93101500  | 5.05637300  | 25.04379800 |
| C | 7.16511900  | 5.45967000  | 27.10720300 |
| C | 6.44441400  | 4.22608600  | 27.56913100 |
| H | 7.14551200  | 3.38776900  | 27.59394300 |
| H | 5.63822000  | 3.96039800  | 26.87959500 |
| H | 6.03752200  | 4.35099200  | 28.57557400 |



|   |            |             |             |
|---|------------|-------------|-------------|
| H | 7.76501000 | 5.96154400  | 27.85580800 |
| C | 5.91917000 | 9.43462000  | 24.83585800 |
| C | 5.57091200 | 8.23536200  | 25.45666800 |
| C | 5.88696300 | 8.03716700  | 26.80539400 |
| C | 6.54816900 | 9.03513800  | 27.52988500 |
| C | 6.89055800 | 10.23070700 | 26.90021900 |
| C | 6.58329600 | 10.43376400 | 25.55168500 |
| H | 5.67047500 | 9.58631900  | 23.78986000 |
| H | 5.05847200 | 7.45280800  | 24.90535400 |
| H | 6.79105100 | 8.86921800  | 28.57544600 |
| H | 7.40031900 | 11.00491200 | 27.46492400 |
| H | 6.85314900 | 11.36593000 | 25.06533000 |
| N | 5.63191100 | 6.78061600  | 27.40550500 |
| O | 8.81124400 | 4.25922400  | 23.53208000 |
| C | 7.89231100 | 3.38132700  | 23.34922700 |
| O | 7.24802700 | 2.73567700  | 24.18185000 |
| O | 7.66894400 | 3.20087600  | 22.00234700 |
| C | 6.67667400 | 2.22610700  | 21.67215300 |
| H | 5.69679900 | 2.50039600  | 22.07526400 |
| H | 6.63122600 | 2.20260000  | 20.58130400 |
| H | 6.94875700 | 1.23578400  | 22.05055100 |
| H | 5.52405000 | 6.82603700  | 28.41685500 |
| H | 4.83725000 | 6.29453300  | 26.99480800 |

***E-IM3a***

|    |             |            |             |
|----|-------------|------------|-------------|
| Rh | 9.91327700  | 5.01105400 | 25.61622300 |
| C  | 11.01255300 | 6.56229300 | 28.55198100 |
| O  | 9.17273900  | 0.84037400 | 26.72922500 |
| N  | 9.85300200  | 2.80286500 | 25.88084200 |
| P  | 10.73528900 | 4.97706000 | 27.67038800 |
| N  | 11.99777800 | 5.01520400 | 24.86682400 |
| O  | 14.21296300 | 4.74593500 | 24.60675400 |
| C  | 12.28792700 | 7.14689000 | 28.49453700 |
| H  | 13.11616700 | 6.60933100 | 28.04724100 |
| C  | 12.50435400 | 8.42522600 | 29.01060200 |
| H  | 13.49715200 | 8.86182700 | 28.95828400 |
| C  | 8.73814800  | 3.42450700 | 30.94222200 |
| H  | 8.56129800  | 3.72983500 | 31.96871400 |
| C  | 9.49742100  | 4.23940000 | 30.10114300 |
| H  | 9.90992200  | 5.15884000 | 30.49618800 |
| C  | 9.74134700  | 3.88673800 | 28.76961700 |
| C  | 9.95855100  | 7.28912200 | 29.13150800 |
| H  | 8.96090000  | 6.87008400 | 29.17416400 |
| C  | 10.18315000 | 8.56006800 | 29.65946300 |
| H  | 9.35940600  | 9.10367500 | 30.10890500 |

|   |             |             |             |
|---|-------------|-------------|-------------|
| C | 11.45413300 | 9.13422700  | 29.59595500 |
| H | 11.62363800 | 10.12776700 | 29.99979100 |
| C | 8.22094800  | 2.22404100  | 30.46197600 |
| H | 7.62760600  | 1.58215600  | 31.10502800 |
| C | 8.47643800  | 1.84087700  | 29.14820800 |
| H | 8.08751100  | 0.90222200  | 28.77388700 |
| C | 9.44678900  | 2.15348800  | 26.91691900 |
| C | 9.22868400  | 2.65496800  | 28.28633400 |
| C | 9.24656000  | 0.60558900  | 25.29148900 |
| H | 8.22270800  | 0.52037600  | 24.91684500 |
| H | 9.77352600  | -0.33557500 | 25.13591800 |
| C | 11.45449600 | 1.62894000  | 24.37151800 |
| H | 11.85177100 | 2.62490900  | 24.15983500 |
| C | 9.97685300  | 1.84848600  | 24.75347800 |
| H | 9.46172600  | 2.28080500  | 23.89540800 |
| C | 12.28184700 | 1.01161500  | 25.50375000 |
| H | 11.98270700 | -0.02418200 | 25.70157700 |
| H | 12.18415600 | 1.57925600  | 26.43263800 |
| H | 13.34288300 | 0.99992300  | 25.23445700 |
| C | 12.39931000 | 4.17675500  | 27.79076900 |
| C | 11.54825400 | 0.79841000  | 23.08762700 |
| H | 10.99301500 | 1.27014200  | 22.26910800 |
| H | 11.14467000 | -0.21105600 | 23.23067400 |
| H | 12.59184500 | 0.69414500  | 22.77250200 |
| C | 12.74309400 | 3.61564900  | 29.02891700 |
| H | 12.02939400 | 3.63578800  | 29.84333100 |
| C | 13.98763000 | 3.02769900  | 29.24617200 |
| H | 14.21676200 | 2.59794400  | 30.21621500 |
| C | 14.92662600 | 2.99750000  | 28.21705100 |
| H | 15.89883700 | 2.54000200  | 28.36944700 |
| C | 14.61085900 | 3.55639600  | 26.98424700 |
| H | 15.33255000 | 3.52879300  | 26.17804400 |
| C | 13.35594600 | 4.14738400  | 26.75047300 |
| C | 13.11582500 | 4.67173900  | 25.39888700 |
| C | 13.74518100 | 5.08243600  | 23.27043700 |
| H | 13.89834000 | 4.20668500  | 22.63487600 |
| H | 14.35528800 | 5.90886300  | 22.90376300 |
| C | 12.25599400 | 5.42842600  | 23.46594600 |
| H | 11.61801100 | 4.81804600  | 22.82660800 |
| C | 11.88291300 | 6.90153400  | 23.22811300 |
| H | 10.81959200 | 6.96622000  | 23.46345200 |
| C | 12.05389700 | 7.25508800  | 21.74775000 |
| H | 11.46824800 | 6.57713200  | 21.11723400 |
| H | 13.10230000 | 7.19304400  | 21.43283600 |

|                |             |             |             |
|----------------|-------------|-------------|-------------|
| H              | 11.71259300 | 8.27775100  | 21.55501500 |
| C              | 12.63198900 | 7.86588100  | 24.15030400 |
| H              | 13.71320700 | 7.84704200  | 23.96906600 |
| H              | 12.45883700 | 7.62201600  | 25.20333500 |
| H              | 12.29249600 | 8.89389700  | 23.98419800 |
| C              | 8.82334900  | 7.82274300  | 24.77922300 |
| H              | 9.68849800  | 8.48556200  | 24.74607100 |
| H              | 8.64009800  | 7.35891800  | 23.81219100 |
| C              | 8.88804100  | 6.83628300  | 25.89770500 |
| H              | 9.15744400  | 7.31384000  | 26.83573200 |
| C              | 7.97488000  | 5.71377800  | 25.98799800 |
| C              | 7.19095500  | 5.37844800  | 27.23728600 |
| H              | 6.22797800  | 5.90978400  | 27.25051900 |
| H              | 7.72319000  | 5.64756100  | 28.15122300 |
| H              | 6.96767100  | 4.30693500  | 27.29437000 |
| O              | 7.75488000  | 5.85702700  | 22.64799800 |
| C              | 8.74621700  | 5.11514300  | 22.60691800 |
| O              | 9.42295900  | 4.60194800  | 23.55645200 |
| O              | 9.25820700  | 4.72277700  | 21.38295800 |
| C              | 8.58243600  | 5.24366100  | 20.23647300 |
| H              | 8.61952400  | 6.33730000  | 20.21408800 |
| H              | 9.10961000  | 4.84141000  | 19.36866900 |
| H              | 7.53526400  | 4.92651100  | 20.20992900 |
| H              | 7.41636400  | 5.50799400  | 25.07350200 |
| C              | 8.49655300  | 11.33291400 | 27.53296800 |
| C              | 8.46535100  | 10.63073200 | 26.32796000 |
| C              | 7.61255300  | 9.53658700  | 26.21467000 |
| C              | 6.80374800  | 9.11934100  | 27.26616800 |
| C              | 6.84180400  | 9.83162000  | 28.46606900 |
| C              | 7.68502000  | 10.93654900 | 28.59920400 |
| H              | 9.15304600  | 12.19078500 | 27.63532900 |
| H              | 9.08861700  | 10.92947600 | 25.49086100 |
| H              | 6.15704800  | 8.25606200  | 27.14844800 |
| H              | 6.21298100  | 9.51949700  | 29.29352700 |
| H              | 7.71221800  | 11.48775900 | 29.53377000 |
| N              | 7.61040500  | 8.77103300  | 24.96513100 |
| H              | 6.76261900  | 8.19639400  | 24.91414700 |
| H              | 7.57488700  | 9.41055000  | 24.16368200 |
| <b>(R)-IM4</b> |             |             |             |
| Rh             | 9.90567800  | 5.40585000  | 25.27230600 |
| C              | 11.69703700 | 7.26307600  | 27.62676700 |
| O              | 8.83530400  | 1.69800700  | 27.29039700 |
| N              | 9.70960800  | 3.30275600  | 25.98884300 |
| P              | 11.09025400 | 5.61385300  | 27.11898500 |

|   |             |             |             |
|---|-------------|-------------|-------------|
| N | 11.75540000 | 5.06086300  | 24.17293400 |
| O | 13.89518800 | 4.65525400  | 23.62984100 |
| C | 13.04643600 | 7.60287600  | 27.45045100 |
| H | 13.75863600 | 6.85807600  | 27.11384900 |
| C | 13.48403200 | 8.90361500  | 27.70722200 |
| H | 14.53178500 | 9.15281600  | 27.56904300 |
| C | 9.29976300  | 5.17661200  | 30.82123000 |
| H | 9.28338600  | 5.73490900  | 31.75178400 |
| C | 10.09372400 | 5.62391100  | 29.76276500 |
| H | 10.68976100 | 6.51727400  | 29.89742000 |
| C | 10.12682100 | 4.94639100  | 28.54012100 |
| C | 10.79296100 | 8.24974200  | 28.05973400 |
| H | 9.74575700  | 8.00932800  | 28.20259100 |
| C | 11.23725100 | 9.54414800  | 28.32303500 |
| H | 10.53031600 | 10.29351200 | 28.66625200 |
| C | 12.58306600 | 9.87545600  | 28.14468700 |
| H | 12.92650000 | 10.88543400 | 28.34703400 |
| C | 8.53798800  | 4.02054600  | 30.67655600 |
| H | 7.91345400  | 3.66590300  | 31.49001600 |
| C | 8.58471500  | 3.30994800  | 29.47903100 |
| H | 8.00473600  | 2.40230100  | 29.36499400 |
| C | 9.33531700  | 2.95005700  | 27.16862900 |
| C | 9.36383200  | 3.75663600  | 28.40126500 |
| C | 8.71104200  | 1.17148200  | 25.93383400 |
| H | 7.64960700  | 1.17822000  | 25.67260400 |
| H | 9.07999800  | 0.14582200  | 25.94168200 |
| C | 10.91167600 | 1.61421400  | 24.61009200 |
| H | 11.42217400 | 2.47088000  | 24.15810000 |
| C | 9.54316300  | 2.14808200  | 25.08029500 |
| H | 8.98626200  | 2.49346500  | 24.20783600 |
| C | 11.77753400 | 1.09008400  | 25.76046300 |
| H | 11.34699200 | 0.18692500  | 26.20812200 |
| H | 11.90103800 | 1.83657600  | 26.54929600 |
| H | 12.77498600 | 0.82839300  | 25.39373600 |
| C | 12.60370800 | 4.57122400  | 27.09831200 |
| C | 10.71621300 | 0.55019400  | 23.52495200 |
| H | 10.13696600 | 0.94398100  | 22.68225100 |
| H | 10.18855400 | -0.32824500 | 23.91519900 |
| H | 11.68360400 | 0.20954300  | 23.14126500 |
| C | 13.07139200 | 4.07836700  | 28.32309100 |
| H | 12.52483100 | 4.30246400  | 29.23213700 |
| C | 14.22896900 | 3.30501000  | 28.40031300 |
| H | 14.56394100 | 2.93152300  | 29.36278000 |
| C | 14.94867500 | 3.02074300  | 27.24102500 |

|   |             |            |             |
|---|-------------|------------|-------------|
| H | 15.85047900 | 2.41881000 | 27.28622400 |
| C | 14.50443700 | 3.50781900 | 26.01587500 |
| H | 15.05549600 | 3.28174200 | 25.11155200 |
| C | 13.33157200 | 4.27641700 | 25.92151300 |
| C | 12.92392600 | 4.70081700 | 24.57277300 |
| C | 13.24222300 | 4.89425300 | 22.34926900 |
| H | 13.22207800 | 3.94619700 | 21.80528800 |
| H | 13.84543700 | 5.61766900 | 21.80043400 |
| C | 11.83439300 | 5.39246700 | 22.73153600 |
| H | 11.06040900 | 4.82557600 | 22.21215500 |
| C | 11.57467800 | 6.89312200 | 22.48668900 |
| H | 10.56601000 | 7.08387600 | 22.86435000 |
| C | 11.58116500 | 7.18748300 | 20.98342200 |
| H | 10.87601500 | 6.53854800 | 20.45317900 |
| H | 12.57444100 | 7.03716900 | 20.54442800 |
| H | 11.29210700 | 8.22665000 | 20.79447200 |
| C | 12.54287300 | 7.79460200 | 23.25754600 |
| H | 13.58050600 | 7.64682700 | 22.93569700 |
| H | 12.48878900 | 7.60598600 | 24.33432400 |
| H | 12.29545600 | 8.84829200 | 23.09027500 |
| C | 9.14511000  | 7.35720500 | 25.24163100 |
| H | 9.76932300  | 8.11469100 | 25.71039900 |
| H | 8.76004200  | 7.62727300 | 24.26156200 |
| C | 8.32629400  | 6.49562500 | 26.07041600 |
| H | 8.40788300  | 6.59316700 | 27.15028000 |
| C | 6.93786800  | 6.10369200 | 25.66072500 |
| C | 6.48840500  | 4.73139600 | 26.13486100 |
| H | 5.42075500  | 4.56804600 | 25.95250200 |
| H | 6.69566900  | 4.57974700 | 27.19708000 |
| H | 7.05328900  | 3.98816100 | 25.57074300 |
| O | 7.79219900  | 6.53093000 | 22.51662500 |
| C | 8.38848200  | 5.44645100 | 22.51456000 |
| O | 8.85863800  | 4.77205100 | 23.49333200 |
| O | 8.59922600  | 4.78369500 | 21.31918700 |
| C | 8.05879100  | 5.41984700 | 20.15845200 |
| H | 8.47954500  | 6.41957500 | 20.01774000 |
| H | 8.33070500  | 4.78373300 | 19.31326100 |
| H | 6.96884500  | 5.50195900 | 20.22020000 |
| H | 6.81335700  | 6.20577000 | 24.58141400 |
| C | 7.04628400  | 8.63312300 | 29.48754200 |
| C | 6.86695400  | 8.45893600 | 28.11510000 |
| C | 6.03599900  | 7.43373600 | 27.66872700 |
| C | 5.36735000  | 6.59444200 | 28.55532100 |
| C | 5.55733300  | 6.77613900 | 29.92626700 |

|   |            |            |             |
|---|------------|------------|-------------|
| C | 6.40108500 | 7.78658500 | 30.39235800 |
| H | 7.69443300 | 9.42632900 | 29.84562600 |
| H | 7.37640500 | 9.09748100 | 27.40091000 |
| H | 4.71499800 | 5.81212800 | 28.18327700 |
| H | 5.04476700 | 6.12524100 | 30.62705500 |
| H | 6.54965200 | 7.91934900 | 31.45929700 |
| N | 5.93963600 | 7.18213700 | 26.22860500 |
| H | 4.98503900 | 6.89777100 | 25.98312000 |
| H | 6.12386700 | 8.05213700 | 25.71955200 |

***E-IM3b***

|    |             |             |             |
|----|-------------|-------------|-------------|
| Rh | 9.62328900  | 4.96037500  | 25.75371300 |
| C  | 11.18858300 | 6.89835900  | 28.29229900 |
| O  | 9.51132000  | 0.93104700  | 27.38597300 |
| N  | 9.94495300  | 2.82659800  | 26.26597600 |
| P  | 10.85462600 | 5.24503400  | 27.57631800 |
| N  | 11.45316000 | 5.12342900  | 24.52237200 |
| O  | 13.60103000 | 5.17996300  | 23.86904400 |
| C  | 12.38389300 | 7.55911600  | 27.97313100 |
| H  | 13.15095100 | 7.05281000  | 27.39801900 |
| C  | 12.59682000 | 8.87356400  | 28.39251700 |
| H  | 13.52680900 | 9.37272300  | 28.13769900 |
| C  | 9.71869000  | 3.92257300  | 31.34050700 |
| H  | 9.74037000  | 4.32506400  | 32.34834300 |
| C  | 10.21273900 | 4.68935300  | 30.28313900 |
| H  | 10.62404400 | 5.66578900  | 30.50087200 |
| C  | 10.20047100 | 4.21631200  | 28.96609900 |
| C  | 10.20844800 | 7.58041100  | 29.03459700 |
| H  | 9.26779000  | 7.09550100  | 29.27170300 |
| C  | 10.43145600 | 8.88811100  | 29.46367600 |
| H  | 9.66913400  | 9.39904900  | 30.04390500 |
| C  | 11.62475600 | 9.53936900  | 29.14060400 |
| H  | 11.79496800 | 10.55944500 | 29.47119500 |
| C  | 9.21088800  | 2.64920200  | 31.09849300 |
| H  | 8.82135900  | 2.04544400  | 31.91169100 |
| C  | 9.22015900  | 2.14321500  | 29.80167600 |
| H  | 8.84881800  | 1.14464200  | 29.60677600 |
| C  | 9.72994600  | 2.26662800  | 27.40561700 |
| C  | 9.70902200  | 2.90523000  | 28.72931800 |
| C  | 9.39066000  | 0.56117500  | 25.97845500 |
| H  | 8.32734800  | 0.42163400  | 25.76320900 |
| H  | 9.92195600  | -0.37953700 | 25.83595600 |
| C  | 11.43375400 | 1.55843300  | 24.71836700 |
| H  | 11.76546600 | 2.54186100  | 24.37227800 |
| C  | 9.99426700  | 1.76294600  | 25.23372300 |

|   |             |             |             |
|---|-------------|-------------|-------------|
| H | 9.36313700  | 2.08157700  | 24.40458500 |
| C | 12.40275100 | 1.07600700  | 25.80299800 |
| H | 12.15063200 | 0.06551900  | 26.14434100 |
| H | 12.40690400 | 1.73926500  | 26.67185100 |
| H | 13.42347700 | 1.04286200  | 25.40950700 |
| C | 12.55182300 | 4.54278600  | 27.36142600 |
| C | 11.42726800 | 0.61105200  | 23.51366300 |
| H | 10.76598600 | 0.98032200  | 22.72173400 |
| H | 11.08809500 | -0.39310100 | 23.79461900 |
| H | 12.43465200 | 0.51291100  | 23.09565200 |
| C | 13.19794100 | 4.06200000  | 28.50859000 |
| H | 12.68919200 | 4.09908500  | 29.46435600 |
| C | 14.48578500 | 3.53166200  | 28.45527300 |
| H | 14.95298400 | 3.16228700  | 29.36270800 |
| C | 15.16279200 | 3.48165100  | 27.23840800 |
| H | 16.16443500 | 3.06823700  | 27.18009700 |
| C | 14.54561300 | 3.96418000  | 26.08984900 |
| H | 15.06371000 | 3.92360200  | 25.14015800 |
| C | 13.24273800 | 4.49248200  | 26.12746500 |
| C | 12.68639500 | 4.95000400  | 24.84402500 |
| C | 12.84496900 | 5.38717100  | 22.64154300 |
| H | 12.92458400 | 4.47448500  | 22.04370900 |
| H | 13.30376400 | 6.21831500  | 22.10618700 |
| C | 11.41211600 | 5.65136900  | 23.13600000 |
| H | 10.68292200 | 5.07487700  | 22.56590000 |
| C | 10.97286700 | 7.12910400  | 23.11759800 |
| H | 9.98091400  | 7.13146900  | 23.57152800 |
| C | 10.81240200 | 7.61305700  | 21.67396200 |
| H | 10.10855700 | 6.97400200  | 21.13255300 |
| H | 11.76633200 | 7.61816700  | 21.13343200 |
| H | 10.41993900 | 8.63570600  | 21.65720500 |
| C | 11.90126700 | 8.03884700  | 23.92704700 |
| H | 12.91374300 | 8.06707700  | 23.50762700 |
| H | 11.97485400 | 7.71664500  | 24.97035000 |
| H | 11.52130700 | 9.06630000  | 23.92441100 |
| C | 8.80906300  | 7.98428500  | 26.02061100 |
| C | 8.34512200  | 6.61060100  | 25.67927900 |
| H | 7.90276500  | 6.56433500  | 24.68790300 |
| C | 7.84809600  | 5.66633000  | 26.65720100 |
| C | 6.58723500  | 4.86008500  | 26.42533800 |
| H | 6.59426400  | 3.93265200  | 27.01163000 |
| H | 6.48341300  | 4.58646800  | 25.37276100 |
| H | 5.68902100  | 5.42208400  | 26.72367600 |
| H | 7.97986900  | 5.95123300  | 27.70411900 |

|                |             |             |             |
|----------------|-------------|-------------|-------------|
| C              | 5.10811600  | 8.40568700  | 23.31238100 |
| C              | 5.71548600  | 8.39594600  | 24.56951700 |
| C              | 6.92765400  | 9.05814500  | 24.72916800 |
| C              | 7.55293200  | 9.72236600  | 23.67790400 |
| C              | 6.93645600  | 9.72427400  | 22.42694600 |
| C              | 5.71771800  | 9.06537900  | 22.24331600 |
| H              | 4.16181200  | 7.89356500  | 23.17171300 |
| H              | 5.26090000  | 7.87598700  | 25.40679600 |
| H              | 8.50422500  | 10.22184600 | 23.83331800 |
| H              | 7.41042000  | 10.23921700 | 21.59767300 |
| H              | 5.24380300  | 9.06677500  | 21.26688400 |
| N              | 7.62127400  | 8.98057300  | 26.01850800 |
| O              | 8.54373600  | 4.14534300  | 24.07941900 |
| C              | 8.08348400  | 4.66474200  | 23.00540200 |
| O              | 8.11339000  | 5.83737200  | 22.61437500 |
| O              | 7.47684700  | 3.69722600  | 22.22691500 |
| C              | 6.93436100  | 4.16323600  | 20.99038900 |
| H              | 7.70961000  | 4.59824200  | 20.35141600 |
| H              | 6.50500100  | 3.28630500  | 20.50063100 |
| H              | 6.15296800  | 4.91280500  | 21.15203400 |
| H              | 7.97299400  | 9.90636900  | 26.28707600 |
| H              | 6.96374800  | 8.69356500  | 26.75087700 |
| H              | 9.50145300  | 8.39724000  | 25.28750100 |
| H              | 9.23516900  | 8.07650700  | 27.01425900 |
| <b>(S)-IM4</b> |             |             |             |
| Rh             | 9.57354600  | 4.84924700  | 25.31506600 |
| C              | 10.94790200 | 7.21260700  | 27.55222900 |
| O              | 9.64630800  | 1.10073100  | 27.66811600 |
| N              | 9.90080400  | 2.79279200  | 26.21181300 |
| P              | 10.64386500 | 5.44654000  | 27.16577300 |
| N              | 11.51073200 | 4.94707900  | 24.30546000 |
| O              | 13.70203700 | 4.98702300  | 23.81621200 |
| C              | 12.24544400 | 7.74223300  | 27.46887300 |
| H              | 13.08923200 | 7.09550500  | 27.26233500 |
| C              | 12.46485900 | 9.10921200  | 27.64704800 |
| H              | 13.47501000 | 9.50133500  | 27.57771100 |
| C              | 9.06163900  | 4.81875800  | 30.93068200 |
| H              | 8.87011800  | 5.41708300  | 31.81590800 |
| C              | 9.63326600  | 5.41412500  | 29.80430100 |
| H              | 9.89186900  | 6.46557800  | 29.83544300 |
| C              | 9.88428900  | 4.67384000  | 28.64556900 |
| C              | 9.87593700  | 8.08292000  | 27.81425500 |
| H              | 8.86417100  | 7.70436600  | 27.87604900 |
| C              | 10.10144700 | 9.44528500  | 28.00246800 |



|   |             |             |             |
|---|-------------|-------------|-------------|
| H | 9.26195300  | 10.09980700 | 28.20911500 |
| C | 11.39549600 | 9.96361100  | 27.91600700 |
| H | 11.56732900 | 11.02642100 | 28.05718800 |
| C | 8.75404300  | 3.46004400  | 30.91678200 |
| H | 8.31605900  | 2.98597500  | 31.78913600 |
| C | 9.00729600  | 2.70465200  | 29.77419000 |
| H | 8.76034200  | 1.65037200  | 29.75642800 |
| C | 9.72930700  | 2.43378600  | 27.43817100 |
| C | 9.55781200  | 3.29306500  | 28.62547000 |
| C | 9.56577900  | 0.46660000  | 26.35708200 |
| H | 8.52261600  | 0.18332300  | 26.19058600 |
| H | 10.19036300 | -0.42602600 | 26.37876700 |
| C | 11.47893000 | 1.40304900  | 24.86496400 |
| H | 11.72369600 | 2.34850500  | 24.37024400 |
| C | 10.03921100 | 1.56632900  | 25.39071000 |
| H | 9.35351200  | 1.65408200  | 24.54904200 |
| C | 12.50077100 | 1.16187300  | 25.98127000 |
| H | 12.36417000 | 0.17696700  | 26.44201500 |
| H | 12.43215500 | 1.91913300  | 26.76597200 |
| H | 13.51748700 | 1.19520900  | 25.57802700 |
| C | 12.34813200 | 4.73844300  | 27.24031300 |
| C | 11.52571900 | 0.28837800  | 23.81448800 |
| H | 10.83355500 | 0.49092500  | 22.98938100 |
| H | 11.25561300 | -0.68115400 | 24.25012600 |
| H | 12.53344700 | 0.19284100  | 23.39663500 |
| C | 12.87400100 | 4.42394900  | 28.49988900 |
| H | 12.26583300 | 4.56537900  | 29.38530300 |
| C | 14.17414700 | 3.94056800  | 28.64484700 |
| H | 14.55048700 | 3.70040900  | 29.63423600 |
| C | 14.98264400 | 3.77707200  | 27.52143800 |
| H | 15.99609600 | 3.40218400  | 27.62122200 |
| C | 14.48323000 | 4.09543700  | 26.26298300 |
| H | 15.10217000 | 3.96401100  | 25.38426200 |
| C | 13.16988700 | 4.56831100  | 26.10431200 |
| C | 12.71931300 | 4.84856100  | 24.73547200 |
| C | 13.04613000 | 5.06563100  | 22.51765000 |
| H | 13.22799300 | 4.12245600  | 21.99557400 |
| H | 13.50758400 | 5.88434200  | 21.96574100 |
| C | 11.56025600 | 5.28293000  | 22.86066100 |
| H | 10.91910300 | 4.57788000  | 22.33129700 |
| C | 11.02678700 | 6.70599800  | 22.59878000 |
| H | 9.98102300  | 6.68521100  | 22.91400900 |
| C | 11.06265000 | 7.01973100  | 21.09938500 |
| H | 10.53996600 | 6.25032400  | 20.51963200 |

|             |             |             |             |
|-------------|-------------|-------------|-------------|
| H           | 12.08896700 | 7.08732200  | 20.72010500 |
| H           | 10.57658000 | 7.98036700  | 20.89914600 |
| C           | 11.75138500 | 7.77240500  | 23.42480200 |
| H           | 12.81681500 | 7.82906000  | 23.17102100 |
| H           | 11.66514700 | 7.57028300  | 24.49646200 |
| H           | 11.31722400 | 8.76000800  | 23.23553500 |
| C           | 8.40165400  | 6.55185300  | 25.06188300 |
| H           | 8.68962100  | 7.42424400  | 25.64116200 |
| H           | 8.22028300  | 6.77502200  | 24.01178200 |
| C           | 7.60386500  | 5.51069200  | 25.67352700 |
| H           | 6.97053200  | 4.93428600  | 24.99902300 |
| C           | 6.98750700  | 5.57328500  | 27.03670700 |
| C           | 6.44814000  | 4.23180600  | 27.51536800 |
| H           | 7.24643900  | 3.49330200  | 27.49985000 |
| H           | 5.65366400  | 3.88037700  | 26.84821700 |
| H           | 6.05190600  | 4.29742600  | 28.53352000 |
| H           | 7.63399800  | 6.02847900  | 27.78480800 |
| C           | 6.25368900  | 9.95940300  | 25.64004100 |
| C           | 5.97468700  | 8.59309100  | 25.69866600 |
| C           | 6.00200900  | 7.95802900  | 26.93574600 |
| C           | 6.29012400  | 8.64524600  | 28.11237000 |
| C           | 6.55772700  | 10.01252500 | 28.04197500 |
| C           | 6.54556900  | 10.66750000 | 26.80750400 |
| H           | 6.23675800  | 10.46789300 | 24.68161400 |
| H           | 5.73924000  | 8.03060100  | 24.80157400 |
| H           | 6.29991600  | 8.12119500  | 29.06318000 |
| H           | 6.77400000  | 10.56324400 | 28.95152500 |
| H           | 6.75755900  | 11.73077700 | 26.75733900 |
| N           | 5.73688000  | 6.52188300  | 27.01214000 |
| O           | 8.82922600  | 4.18692200  | 23.42522300 |
| C           | 7.93243600  | 3.29556500  | 23.21973600 |
| O           | 7.28537500  | 2.62340000  | 24.03069500 |
| O           | 7.73134200  | 3.12466300  | 21.86467400 |
| C           | 6.76979500  | 2.12957100  | 21.50957700 |
| H           | 5.77614500  | 2.37443400  | 21.89826300 |
| H           | 6.74225100  | 2.11451400  | 20.41774300 |
| H           | 7.05913700  | 1.14216400  | 21.88326300 |
| H           | 5.18429600  | 6.32842200  | 27.85471400 |
| H           | 5.15457500  | 6.23278200  | 26.21825000 |
| <b>E-3a</b> |             |             |             |
| C           | -1.80515900 | 0.96769300  | -0.69129600 |
| H           | -2.13338900 | 1.49850200  | 0.20362200  |
| C           | -1.19025700 | 1.63643300  | -1.66886700 |
| H           | -0.87377100 | 1.08466300  | -2.55338300 |

|               |             |             |             |
|---------------|-------------|-------------|-------------|
| C             | -0.89600400 | 3.10724600  | -1.65117000 |
| H             | -1.24137600 | 3.57900000  | -0.72555400 |
| H             | 0.18067900  | 3.29785700  | -1.75074400 |
| H             | -1.37914100 | 3.61710900  | -2.49510800 |
| C             | -2.11211900 | -0.51033900 | -0.69221200 |
| H             | -1.57127300 | -0.98743500 | 0.13376800  |
| H             | -3.18219100 | -0.65001600 | -0.46802000 |
| N             | -1.74968400 | -1.21050000 | -1.91369100 |
| H             | -1.16270200 | -2.02193000 | -1.78133600 |
| C             | -2.60138300 | -1.28819600 | -3.00296800 |
| C             | -2.38114800 | -2.27303100 | -3.99019100 |
| C             | -3.67571700 | -0.39252200 | -3.17984000 |
| C             | -3.20499600 | -2.35518300 | -5.10806400 |
| H             | -1.55749700 | -2.97145300 | -3.86287800 |
| C             | -4.49441500 | -0.48992300 | -4.30579400 |
| H             | -3.85666500 | 0.38717500  | -2.44923800 |
| C             | -4.27241400 | -1.46591800 | -5.27925000 |
| H             | -3.01414600 | -3.12536200 | -5.85084300 |
| H             | -5.31590600 | 0.21273600  | -4.41957900 |
| H             | -4.91373300 | -1.53334300 | -6.15249400 |
| <b>(R)-2a</b> |             |             |             |
| C             | -0.77974900 | -2.86386900 | -1.30541900 |
| H             | 0.12478600  | -3.43279200 | -1.05953400 |
| H             | -0.50348900 | -2.07716700 | -2.01270300 |
| H             | -1.49145200 | -3.54070500 | -1.78848500 |
| C             | -1.39305300 | -2.25420500 | -0.04256200 |
| H             | -2.28530200 | -1.68565500 | -0.32727800 |
| C             | -0.41847600 | -1.32344000 | 0.64189500  |
| H             | 0.49831500  | -1.79678600 | 0.99713400  |
| C             | -0.61969000 | -0.02029800 | 0.83692300  |
| H             | -1.52865400 | 0.47067300  | 0.49461000  |
| H             | 0.11507300  | 0.60535400  | 1.33724700  |
| N             | -1.81170900 | -3.35087600 | 0.83753900  |
| H             | -1.12251400 | -4.09179600 | 0.90362700  |
| C             | -2.51128900 | -3.14025200 | 2.01948800  |
| C             | -2.50163400 | -4.14378300 | 3.01180900  |
| C             | -3.27906800 | -1.98132400 | 2.25191300  |
| C             | -3.23783700 | -3.99664800 | 4.18296800  |
| H             | -1.90784600 | -5.03968300 | 2.84617200  |
| C             | -4.01239300 | -1.84767500 | 3.43175300  |
| H             | -3.30397100 | -1.18748900 | 1.51548100  |
| C             | -4.00221200 | -2.84622100 | 4.40755000  |
| H             | -3.21012700 | -4.78661800 | 4.92894800  |
| H             | -4.59632400 | -0.94408600 | 3.58666100  |

|               |             |             |             |
|---------------|-------------|-------------|-------------|
| H             | -4.57339700 | -2.73143100 | 5.32351400  |
| <b>(S)-2a</b> |             |             |             |
| C             | -0.77974900 | -2.86386900 | 1.30541900  |
| H             | 0.12478600  | -3.43279200 | 1.05953400  |
| H             | -0.50348900 | -2.07716700 | 2.01270300  |
| H             | -1.49145200 | -3.54070500 | 1.78848500  |
| C             | -1.39305300 | -2.25420500 | 0.04256200  |
| H             | -2.28530200 | -1.68565500 | 0.32727800  |
| C             | -0.41847600 | -1.32344000 | -0.64189500 |
| H             | 0.49831500  | -1.79678600 | -0.99713400 |
| C             | -0.61969000 | -0.02029800 | -0.83692300 |
| H             | -1.52865400 | 0.47067300  | -0.49461000 |
| H             | 0.11507300  | 0.60535400  | -1.33724700 |
| N             | -1.81170900 | -3.35087600 | -0.83753900 |
| H             | -1.12251400 | -4.09179600 | -0.90362700 |
| C             | -2.51128900 | -3.14025200 | -2.01948800 |
| C             | -2.50163400 | -4.14378300 | -3.01180900 |
| C             | -3.27906800 | -1.98132400 | -2.25191300 |
| C             | -3.23783700 | -3.99664800 | -4.18296800 |
| H             | -1.90784600 | -5.03968300 | -2.84617200 |
| C             | -4.01239300 | -1.84767500 | -3.43175300 |
| H             | -3.30397100 | -1.18748900 | -1.51548100 |
| C             | -4.00221200 | -2.84622100 | -4.40755000 |
| H             | -3.21012700 | -4.78661800 | -4.92894800 |
| H             | -4.59632400 | -0.94408600 | -3.58666100 |
| H             | -4.57339700 | -2.73143100 | -5.32351400 |

**IM2a'-endo**

|    |             |            |             |
|----|-------------|------------|-------------|
| Rh | 9.63551800  | 5.02370700 | 25.46724400 |
| C  | 11.40954500 | 6.94159200 | 27.82059400 |
| O  | 9.18078900  | 1.15030700 | 27.38891600 |
| N  | 9.76894600  | 2.89204500 | 26.10750000 |
| P  | 10.84636200 | 5.28327800 | 27.32110900 |
| N  | 11.46534300 | 5.36937900 | 24.48694500 |
| O  | 13.55161200 | 5.05707300 | 23.76123500 |
| C  | 12.78457600 | 7.22080400 | 27.87639200 |
| H  | 13.51301000 | 6.45003300 | 27.65832300 |
| C  | 13.22641500 | 8.50052200 | 28.21203700 |
| H  | 14.29188200 | 8.70409500 | 28.24817600 |
| C  | 9.22671500  | 4.54292700 | 31.02090100 |
| H  | 9.14280700  | 5.06821500 | 31.96663500 |
| C  | 9.87072000  | 5.15857200 | 29.94497300 |
| H  | 10.29170600 | 6.14864700 | 30.07056600 |
| C  | 9.98448500  | 4.50354900 | 28.71748700 |
| C  | 10.48807400 | 7.96054600 | 28.11692300 |

|   |             |             |             |
|---|-------------|-------------|-------------|
| H | 9.42360300  | 7.76647600  | 28.10534000 |
| C | 10.93763800 | 9.23540700  | 28.45377900 |
| H | 10.21595700 | 10.01271600 | 28.68361300 |
| C | 12.30671300 | 9.50999600  | 28.49607100 |
| H | 12.65328500 | 10.50589900 | 28.75399700 |
| C | 8.70567900  | 3.25940700  | 30.87763800 |
| H | 8.20800900  | 2.77331500  | 31.71009500 |
| C | 8.81938900  | 2.59290700  | 29.65870800 |
| H | 8.40543000  | 1.59905500  | 29.54428000 |
| C | 9.49302800  | 2.45570100  | 27.29548600 |
| C | 9.44621600  | 3.20275300  | 28.56408700 |
| C | 9.02553400  | 0.66315500  | 26.02120100 |
| H | 7.95443000  | 0.62020400  | 25.80770100 |
| H | 9.45572400  | -0.33578900 | 25.97140000 |
| C | 11.18482000 | 1.33271000  | 24.75336200 |
| H | 11.65746600 | 2.25331100  | 24.39522600 |
| C | 9.75599000  | 1.72288100  | 25.18613100 |
| H | 9.16841100  | 1.98471400  | 24.30865200 |
| C | 12.03789500 | 0.78727900  | 25.90235200 |
| H | 11.66371900 | -0.17847000 | 26.25886000 |
| H | 12.07482400 | 1.47557100  | 26.74923900 |
| H | 13.06509200 | 0.63203800  | 25.56059200 |
| C | 12.38401000 | 4.30232900  | 27.15909200 |
| C | 11.11905700 | 0.33900300  | 23.58892900 |
| H | 10.56738300 | 0.75489900  | 22.73989100 |
| H | 10.62381000 | -0.59124600 | 23.89117100 |
| H | 12.12684300 | 0.08155100  | 23.24778200 |
| C | 12.90150800 | 3.68687700  | 28.30238300 |
| H | 12.37443200 | 3.76724100  | 29.24577700 |
| C | 14.10263600 | 2.97658300  | 28.24674400 |
| H | 14.48810400 | 2.50676100  | 29.14564400 |
| C | 14.79877000 | 2.87419400  | 27.04412500 |
| H | 15.72926900 | 2.31886200  | 26.99405500 |
| C | 14.29738400 | 3.48718000  | 25.89836600 |
| H | 14.83302400 | 3.41227500  | 24.95987300 |
| C | 13.09407100 | 4.20352200  | 25.94335000 |
| C | 12.64037900 | 4.88225900  | 24.72700700 |
| C | 12.83458200 | 5.62619600  | 22.61471300 |
| H | 12.64021900 | 4.81044700  | 21.91453600 |
| H | 13.48627700 | 6.36824800  | 22.15717100 |
| C | 11.55505200 | 6.18986400  | 23.24232700 |
| H | 10.68382700 | 5.99640100  | 22.62063200 |
| C | 11.59786300 | 7.70020300  | 23.55350600 |
| H | 10.71472600 | 7.90550800  | 24.16177200 |

|   |             |            |             |
|---|-------------|------------|-------------|
| C | 11.45991900 | 8.48575400 | 22.24385900 |
| H | 10.54290700 | 8.20796400 | 21.71377000 |
| H | 12.30791300 | 8.30018300 | 21.57418900 |
| H | 11.42730900 | 9.56130300 | 22.44503200 |
| C | 12.83192100 | 8.13349600 | 24.34816100 |
| H | 13.75133200 | 8.02675300 | 23.76196900 |
| H | 12.94250100 | 7.55874500 | 25.27029200 |
| H | 12.74347400 | 9.18717200 | 24.63188100 |
| C | 8.72368400  | 6.95351700 | 25.35207400 |
| H | 9.27814500  | 7.82014300 | 25.69689800 |
| H | 8.31821200  | 7.03542400 | 24.34890800 |
| C | 7.98830600  | 6.21131600 | 26.33329200 |
| H | 8.07508400  | 6.46340000 | 27.38804100 |
| C | 7.37963000  | 4.99845900 | 26.00876200 |
| C | 6.71479800  | 4.13282700 | 27.03228100 |
| H | 5.62939800  | 4.28677000 | 26.96701300 |
| H | 7.03178000  | 4.36791900 | 28.05003600 |
| H | 6.88804100  | 3.07037300 | 26.83778400 |
| O | 8.60406900  | 5.87413000 | 21.52630800 |
| C | 8.04711100  | 5.43772100 | 22.53496500 |
| O | 6.95239200  | 5.64019700 | 23.06866000 |
| O | 8.87100400  | 4.44879600 | 23.33175500 |
| C | 9.73978900  | 3.64686100 | 22.51143100 |
| H | 10.02654900 | 4.20529300 | 21.62085700 |
| H | 10.62931200 | 3.38492700 | 23.07785000 |
| H | 9.21046300  | 2.73708600 | 22.20912300 |
| H | 7.09182500  | 4.84333700 | 24.97081700 |

**TS4a-endo**

|    |             |            |             |
|----|-------------|------------|-------------|
| Rh | 9.65814000  | 5.01648900 | 25.45021700 |
| C  | 11.39313700 | 6.93859700 | 27.89119600 |
| O  | 9.24454000  | 1.12372000 | 27.37412000 |
| N  | 9.79498000  | 2.88243900 | 26.09748000 |
| P  | 10.85043100 | 5.28351600 | 27.34818600 |
| N  | 11.49983600 | 5.31294000 | 24.48210500 |
| O  | 13.59881400 | 4.99371600 | 23.79602700 |
| C  | 12.75814400 | 7.26495200 | 27.89114400 |
| H  | 13.50018600 | 6.52228000 | 27.62523800 |
| C  | 13.17252900 | 8.55285900 | 28.23241000 |
| H  | 14.23127300 | 8.79213900 | 28.22478400 |
| C  | 9.20199900  | 4.47690100 | 31.03231600 |
| H  | 9.10788600  | 4.98712100 | 31.98546800 |
| C  | 9.86282100  | 5.10672300 | 29.97508300 |
| H  | 10.28548000 | 6.09270400 | 30.12440400 |
| C  | 9.99137700  | 4.47539100 | 28.73630300 |

|   |             |             |             |
|---|-------------|-------------|-------------|
| C | 10.45329700 | 7.92049200  | 28.24887000 |
| H | 9.39602100  | 7.68748600  | 28.27977800 |
| C | 10.87442600 | 9.20295900  | 28.59500800 |
| H | 10.13851200 | 9.94972500  | 28.87595300 |
| C | 12.23401800 | 9.52407300  | 28.58151600 |
| H | 12.55859400 | 10.52561800 | 28.84637200 |
| C | 8.67712100  | 3.19848700  | 30.86092400 |
| H | 8.16475600  | 2.70080000  | 31.67755400 |
| C | 8.80944100  | 2.55182200  | 29.63361400 |
| H | 8.39721400  | 1.55998200  | 29.49769500 |
| C | 9.52593400  | 2.43857300  | 27.28339300 |
| C | 9.45471800  | 3.17683000  | 28.55752200 |
| C | 9.10548200  | 0.63466900  | 26.00666800 |
| H | 8.03630300  | 0.55638800  | 25.79256000 |
| H | 9.56756400  | -0.34999400 | 25.95489100 |
| C | 11.23162600 | 1.37200400  | 24.71513900 |
| H | 11.67086900 | 2.30943300  | 24.35747300 |
| C | 9.79959900  | 1.71889300  | 25.17158200 |
| H | 9.19653900  | 1.97235200  | 24.30333700 |
| C | 12.11347200 | 0.83701400  | 25.84727100 |
| H | 11.76972100 | -0.14337500 | 26.19462300 |
| H | 12.13923600 | 1.51497900  | 26.70327500 |
| H | 13.14113900 | 0.71507100  | 25.49345300 |
| C | 12.40851200 | 4.32381800  | 27.20944600 |
| C | 11.17547100 | 0.38936900  | 23.54092700 |
| H | 10.59949500 | 0.80085300  | 22.70566400 |
| H | 10.70948700 | -0.55730100 | 23.83914800 |
| H | 12.18410900 | 0.16249200  | 23.18077600 |
| C | 12.93060900 | 3.73360200  | 28.36428000 |
| H | 12.39844900 | 3.82453500  | 29.30390500 |
| C | 14.13745800 | 3.03253600  | 28.32811900 |
| H | 14.52252700 | 2.58193500  | 29.23709900 |
| C | 14.84072300 | 2.91641800  | 27.13090700 |
| H | 15.77707800 | 2.36980500  | 27.09413000 |
| C | 14.33678600 | 3.50290200  | 25.97312400 |
| H | 14.87649600 | 3.41439900  | 25.03830900 |
| C | 13.12427100 | 4.20668700  | 25.99785900 |
| C | 12.67371100 | 4.84427100  | 24.75687700 |
| C | 12.89351200 | 5.51211200  | 22.62096500 |
| H | 12.71408200 | 4.67014500  | 21.94766400 |
| H | 13.54574200 | 6.24192000  | 22.14473300 |
| C | 11.60193300 | 6.08752300  | 23.21132200 |
| H | 10.73726000 | 5.86309800  | 22.59392800 |
| C | 11.63146700 | 7.60840700  | 23.46830600 |

|   |             |            |             |
|---|-------------|------------|-------------|
| H | 10.72499200 | 7.83283400 | 24.03352900 |
| C | 11.54617500 | 8.35149600 | 22.12971600 |
| H | 10.65419500 | 8.05351400 | 21.56902500 |
| H | 12.42349600 | 8.15359600 | 21.50310700 |
| H | 11.49840100 | 9.43232700 | 22.29704700 |
| C | 12.83257200 | 8.06999700 | 24.29686600 |
| H | 13.77747100 | 7.91996100 | 23.76294300 |
| H | 12.88944900 | 7.54467600 | 25.25304700 |
| H | 12.74636900 | 9.13875300 | 24.51843400 |
| C | 8.78577700  | 6.95370400 | 25.29807500 |
| H | 9.34244900  | 7.81302000 | 25.66075800 |
| H | 8.42460500  | 7.05701700 | 24.28175600 |
| C | 8.01297000  | 6.23299400 | 26.26732600 |
| H | 8.09604800  | 6.50302900 | 27.31714300 |
| C | 7.39288800  | 5.02032000 | 25.97022800 |
| C | 6.72282500  | 4.18713400 | 27.01862300 |
| H | 5.63751800  | 4.34184700 | 26.95387000 |
| H | 7.04584200  | 4.44872600 | 28.02824800 |
| H | 6.89472400  | 3.11932500 | 26.85392000 |
| O | 8.43889700  | 6.24445800 | 21.61059100 |
| C | 7.65927700  | 5.81752200 | 22.39996000 |
| O | 6.58713500  | 5.71155800 | 22.90161100 |
| O | 8.79576800  | 4.52742700 | 23.52664000 |
| C | 9.52245800  | 3.73018800 | 22.61966900 |
| H | 9.71613800  | 4.26917700 | 21.68091100 |
| H | 10.49545300 | 3.41982900 | 23.01409200 |
| H | 8.96119800  | 2.81886800 | 22.35644800 |
| H | 7.12100600  | 4.80795800 | 24.94259800 |

**IM5a-endo**

|    |             |            |             |
|----|-------------|------------|-------------|
| Rh | 9.72437300  | 5.07097400 | 25.54828600 |
| C  | 11.32821300 | 6.94379400 | 28.10677800 |
| O  | 9.23596800  | 1.11858800 | 27.18752700 |
| N  | 9.83695100  | 2.96022900 | 26.07218300 |
| P  | 10.87905400 | 5.28228100 | 27.49588800 |
| N  | 11.60531200 | 5.15095500 | 24.56453900 |
| O  | 13.73018900 | 4.78737200 | 23.97321100 |
| C  | 12.62556100 | 7.42454500 | 27.86484900 |
| H  | 13.37591100 | 6.78006000 | 27.42250500 |
| C  | 12.96243000 | 8.73839300 | 28.19088800 |
| H  | 13.96937800 | 9.09500800 | 27.99746800 |
| C  | 9.24661500  | 4.16530400 | 31.11626600 |
| H  | 9.16235000  | 4.59499200 | 32.10929200 |
| C  | 9.89749600  | 4.88036500 | 30.10800200 |
| H  | 10.32514200 | 5.84786700 | 30.33913200 |



|   |             |             |             |
|---|-------------|-------------|-------------|
| C | 10.01504300 | 4.35966800  | 28.81725300 |
| C | 10.37816300 | 7.80365900  | 28.68365200 |
| H | 9.37433700  | 7.45661300  | 28.89628800 |
| C | 10.72379100 | 9.11327800  | 29.01474300 |
| H | 9.98182700  | 9.76239500  | 29.46926500 |
| C | 12.01396900 | 9.58574200  | 28.76501100 |
| H | 12.27856400 | 10.60721900 | 29.02035800 |
| C | 8.71992300  | 2.90574400  | 30.84446300 |
| H | 8.21432100  | 2.34129300  | 31.62097500 |
| C | 8.84537300  | 2.36348200  | 29.56701000 |
| H | 8.43698900  | 1.38361000  | 29.35378700 |
| C | 9.54664900  | 2.43009500  | 27.21397700 |
| C | 9.48173200  | 3.07406200  | 28.53969500 |
| C | 9.10090800  | 0.75675800  | 25.77607800 |
| H | 8.03171400  | 0.72047900  | 25.55005300 |
| H | 9.54169900  | -0.23038900 | 25.64489400 |
| C | 11.25967500 | 1.54844700  | 24.57709700 |
| H | 11.70340800 | 2.49308200  | 24.24969300 |
| C | 9.82939300  | 1.89149800  | 25.04264000 |
| H | 9.25911800  | 2.26840400  | 24.19286700 |
| C | 12.13605900 | 0.96298300  | 25.68948200 |
| H | 11.78290800 | -0.02753800 | 25.99747300 |
| H | 12.16339600 | 1.60684100  | 26.57227200 |
| H | 13.16501800 | 0.84736200  | 25.33555400 |
| C | 12.48482800 | 4.39324800  | 27.41746700 |
| C | 11.19991900 | 0.61345900  | 23.36407200 |
| H | 10.61430800 | 1.05511200  | 22.55028800 |
| H | 10.74488100 | -0.34982100 | 23.62305800 |
| H | 12.20735300 | 0.41079900  | 22.98612700 |
| C | 13.00323400 | 3.87081200  | 28.60826000 |
| H | 12.45111600 | 3.98960400  | 29.53297800 |
| C | 14.22412500 | 3.19726400  | 28.62991000 |
| H | 14.59995700 | 2.79750800  | 29.56621200 |
| C | 14.95193900 | 3.04224800  | 27.45163900 |
| H | 15.90029000 | 2.51524400  | 27.45528000 |
| C | 14.45665200 | 3.56429500  | 26.26137300 |
| H | 15.01470500 | 3.44076500  | 25.34222300 |
| C | 13.22514700 | 4.23943000  | 26.22686900 |
| C | 12.77929800 | 4.75181300  | 24.92529100 |
| C | 13.05732300 | 5.10440700  | 22.71857600 |
| H | 12.97897000 | 4.17752800  | 22.14426200 |
| H | 13.67994100 | 5.82018000  | 22.18397500 |
| C | 11.69317200 | 5.64868600  | 23.16502400 |
| H | 10.88073300 | 5.18971700  | 22.60499500 |

|   |             |            |             |
|---|-------------|------------|-------------|
| C | 11.55681700 | 7.18289400 | 23.09798000 |
| H | 10.56094600 | 7.41145800 | 23.48198400 |
| C | 11.61073700 | 7.65215700 | 21.63965300 |
| H | 10.88183200 | 7.11574500 | 21.02202100 |
| H | 12.60274300 | 7.50118200 | 21.19893600 |
| H | 11.38463600 | 8.72154500 | 21.57708400 |
| C | 12.58087600 | 7.91461200 | 23.97002200 |
| H | 13.60805200 | 7.72065500 | 23.63991700 |
| H | 12.49785900 | 7.61953200 | 25.01996000 |
| H | 12.41848000 | 8.99614400 | 23.91615300 |
| C | 8.97429700  | 7.06572700 | 25.33996600 |
| H | 9.59989900  | 7.89340800 | 25.66431700 |
| H | 8.57896500  | 7.16079200 | 24.33527200 |
| C | 8.19238400  | 6.40916200 | 26.34218600 |
| H | 8.30534800  | 6.69475600 | 27.38320700 |
| C | 7.51384500  | 5.21364700 | 26.08084000 |
| C | 6.83099500  | 4.42774300 | 27.15976100 |
| H | 5.75514300  | 4.64682800 | 27.14170200 |
| H | 7.21366800  | 4.67135700 | 28.15293100 |
| H | 6.93497500  | 3.35106100 | 26.99450800 |
| O | 8.94757700  | 4.44255900 | 23.70720600 |
| C | 8.28741800  | 5.25882000 | 22.79294400 |
| H | 7.35679100  | 5.71993700 | 23.17911500 |
| H | 8.90428700  | 6.08819600 | 22.39791300 |
| H | 7.98458100  | 4.65458300 | 21.92053100 |
| H | 7.18512000  | 5.00326600 | 25.06982400 |

***E-TS5a***

|    |             |            |             |
|----|-------------|------------|-------------|
| Rh | 9.93503500  | 5.08849700 | 25.59575800 |
| C  | 11.16267700 | 6.61882400 | 28.53156400 |
| O  | 9.09210500  | 1.00109800 | 26.70052700 |
| N  | 9.83129200  | 2.94246300 | 25.86332200 |
| P  | 10.83153900 | 5.04281200 | 27.65583700 |
| N  | 12.01430900 | 5.10588200 | 24.83249600 |
| O  | 14.17233000 | 4.61149700 | 24.46578100 |
| C  | 12.45716300 | 7.16132300 | 28.49365800 |
| H  | 13.27687100 | 6.59000700 | 28.07263900 |
| C  | 12.70266800 | 8.44014400 | 28.99615200 |
| H  | 13.70979500 | 8.84445300 | 28.96029400 |
| C  | 8.86785900  | 3.53109000 | 30.96490600 |
| H  | 8.72741400  | 3.82871000 | 31.99927500 |
| C  | 9.64047800  | 4.32578700 | 30.11616400 |
| H  | 10.09695700 | 5.22630600 | 30.50803500 |
| C  | 9.83554700  | 3.98061800 | 28.77577100 |
| C  | 10.12050500 | 7.38529200 | 29.08212700 |

|   |             |             |             |
|---|-------------|-------------|-------------|
| H | 9.11075200  | 6.99493500  | 29.11786500 |
| C | 10.37237700 | 8.65931200  | 29.58996300 |
| H | 9.55564300  | 9.23658000  | 30.01114200 |
| C | 11.66253800 | 9.19224400  | 29.54469800 |
| H | 11.85502000 | 10.18708800 | 29.93479500 |
| C | 8.28815300  | 2.36073300  | 30.48121100 |
| H | 7.68421700  | 1.73540100  | 31.13063300 |
| C | 8.49137800  | 1.98681800  | 29.15524800 |
| H | 8.05031600  | 1.07256500  | 28.77802400 |
| C | 9.41838000  | 2.29793200  | 26.90362000 |
| C | 9.25534100  | 2.78216200  | 28.28671400 |
| C | 9.12073700  | 0.79191400  | 25.25570600 |
| H | 8.08654200  | 0.80024400  | 24.89986100 |
| H | 9.56738100  | -0.18454800 | 25.07131400 |
| C | 11.41197400 | 1.66962700  | 24.40744800 |
| H | 11.88239600 | 2.63778700  | 24.22000700 |
| C | 9.93780200  | 1.98293500  | 24.73604800 |
| H | 9.48048300  | 2.44214600  | 23.86164500 |
| C | 12.15849400 | 0.98497000  | 25.55730100 |
| H | 11.77878500 | -0.02742500 | 25.73628600 |
| H | 12.07936200 | 1.55067400  | 26.48903600 |
| H | 13.22255100 | 0.89763100  | 25.31605800 |
| C | 12.46927300 | 4.18701100  | 27.73332000 |
| C | 11.49543000 | 0.84753700  | 23.11703500 |
| H | 11.00444400 | 1.36403500  | 22.28472700 |
| H | 11.01874200 | -0.13294500 | 23.23360200 |
| H | 12.54044100 | 0.67486800  | 22.83924700 |
| C | 12.83855800 | 3.62459900  | 28.96314500 |
| H | 12.16376700 | 3.69426100  | 29.80766200 |
| C | 14.05702600 | 2.96988200  | 29.13239800 |
| H | 14.30784500 | 2.54171100  | 30.09778300 |
| C | 14.94181000 | 2.86954800  | 28.06051800 |
| H | 15.89202000 | 2.35800300  | 28.17487800 |
| C | 14.60084400 | 3.42928500  | 26.83481800 |
| H | 15.28217200 | 3.35056600  | 25.99765300 |
| C | 13.37305500 | 4.09088300  | 26.65067200 |
| C | 13.11248200 | 4.63698600  | 25.31109500 |
| C | 13.65560600 | 4.96459000  | 23.15067500 |
| H | 13.58688500 | 4.04455100  | 22.56281000 |
| H | 14.37009000 | 5.64333500  | 22.68539700 |
| C | 12.28297800 | 5.58458700  | 23.45387500 |
| H | 11.49535500 | 5.18615200  | 22.81385500 |
| C | 12.23888200 | 7.12346100  | 23.38094500 |
| H | 11.22912900 | 7.39770200  | 23.69098100 |

|                |             |             |             |
|----------------|-------------|-------------|-------------|
| C              | 12.42892000 | 7.59026300  | 21.93388400 |
| H              | 11.70746400 | 7.10965200  | 21.26330600 |
| H              | 13.43514500 | 7.36239200  | 21.56378900 |
| H              | 12.28981800 | 8.67388300  | 21.85888900 |
| C              | 13.22701000 | 7.80471700  | 24.33253400 |
| H              | 14.26594800 | 7.55578500  | 24.08706000 |
| H              | 13.04470700 | 7.51887200  | 25.37334300 |
| H              | 13.12730500 | 8.89339700  | 24.26608300 |
| C              | 8.96261000  | 7.63095500  | 24.74995600 |
| H              | 9.74896400  | 8.37815900  | 24.73694000 |
| H              | 8.75384900  | 7.14885200  | 23.80167800 |
| C              | 8.78283800  | 6.89492500  | 25.94902900 |
| H              | 9.07567200  | 7.40443200  | 26.86020700 |
| C              | 7.97347900  | 5.70239600  | 26.05689900 |
| C              | 7.24160600  | 5.36958700  | 27.33704700 |
| H              | 6.27440600  | 5.89019500  | 27.37171900 |
| H              | 7.80032800  | 5.65948700  | 28.22817500 |
| H              | 7.03386400  | 4.29713800  | 27.41302900 |
| O              | 9.40811400  | 4.85839800  | 23.57599600 |
| C              | 8.13807700  | 4.51543800  | 23.13405700 |
| H              | 7.66044600  | 3.69477300  | 23.70713500 |
| H              | 7.41136400  | 5.35483800  | 23.13538900 |
| H              | 8.18670000  | 4.16717700  | 22.08578300 |
| H              | 7.37244800  | 5.46897900  | 25.18158900 |
| C              | 8.09687200  | 11.11115700 | 27.62181800 |
| C              | 8.17693300  | 10.63387600 | 26.31449500 |
| C              | 7.35815800  | 9.57121800  | 25.91721300 |
| C              | 6.47510400  | 8.97987900  | 26.82564600 |
| C              | 6.40414700  | 9.46371700  | 28.13255300 |
| C              | 7.21296700  | 10.52859500 | 28.53566000 |
| H              | 8.72896400  | 11.93918000 | 27.92776500 |
| H              | 8.86933000  | 11.07552000 | 25.60357200 |
| H              | 5.85432300  | 8.14830600  | 26.50748700 |
| H              | 5.71554100  | 9.00422900  | 28.83506300 |
| H              | 7.15547100  | 10.90328800 | 29.55278400 |
| N              | 7.53417400  | 8.98911500  | 24.63376100 |
| H              | 6.71919200  | 8.47096100  | 24.31231900 |
| H              | 7.83005400  | 9.65187000  | 23.91921700 |
| <b>(R)-TS6</b> |             |             |             |
| Rh             | 9.80888400  | 5.16862500  | 25.33673800 |
| C              | 11.50962400 | 7.06141500  | 27.79086600 |
| O              | 9.13208600  | 1.29180000  | 27.20763900 |
| N              | 9.80397300  | 3.04150500  | 25.97661100 |
| P              | 11.01185500 | 5.39962100  | 27.21147700 |

|   |             |             |             |
|---|-------------|-------------|-------------|
| N | 11.65167500 | 5.08688800  | 24.25183500 |
| O | 13.79393000 | 4.79824800  | 23.65954000 |
| C | 12.84446400 | 7.47955300  | 27.68446300 |
| H | 13.61039800 | 6.78425400  | 27.36017900 |
| C | 13.19781200 | 8.79469200  | 27.99252500 |
| H | 14.23504700 | 9.10413900  | 27.90657200 |
| C | 9.36858200  | 4.60346300  | 30.92051500 |
| H | 9.32324200  | 5.10623500  | 31.88143900 |
| C | 10.06049500 | 5.19770100  | 29.86263100 |
| H | 10.55185900 | 6.14932100  | 30.02328900 |
| C | 10.13306800 | 4.58617400  | 28.60780600 |
| C | 10.53496100 | 7.98594700  | 28.20707900 |
| H | 9.49686500  | 7.68888600  | 28.29693900 |
| C | 10.89461700 | 9.29483300  | 28.52275700 |
| H | 10.13115300 | 9.99276500  | 28.85218400 |
| C | 12.22631700 | 9.70391300  | 28.41336400 |
| H | 12.50389500 | 10.72523400 | 28.65587400 |
| C | 8.74802600  | 3.37038800  | 30.73800700 |
| H | 8.20753900  | 2.89918300  | 31.55250000 |
| C | 8.82537200  | 2.73539300  | 29.50038300 |
| H | 8.34642200  | 1.77503700  | 29.35406300 |
| C | 9.51208200  | 2.59041100  | 27.14709000 |
| C | 9.50500600  | 3.32559900  | 28.42452600 |
| C | 8.96941400  | 0.85120300  | 25.82374800 |
| H | 7.89674900  | 0.81839700  | 25.61290900 |
| H | 9.39043100  | -0.15064900 | 25.74338900 |
| C | 11.09977200 | 1.51878200  | 24.48946500 |
| H | 11.54964600 | 2.43491700  | 24.09330600 |
| C | 9.70535600  | 1.92833500  | 25.00774000 |
| H | 9.10908700  | 2.28824600  | 24.16724600 |
| C | 12.01488300 | 0.97060400  | 25.58954000 |
| H | 11.65153900 | 0.00970200  | 25.97138900 |
| H | 12.10122100 | 1.66296700  | 26.43085800 |
| H | 13.02216800 | 0.80489100  | 25.19495000 |
| C | 12.58881600 | 4.45821600  | 27.13156900 |
| C | 10.95623400 | 0.52197200  | 23.33439200 |
| H | 10.34383000 | 0.93596100  | 22.52555800 |
| H | 10.48685500 | -0.41130000 | 23.66778600 |
| H | 11.93755900 | 0.26750400  | 22.92037600 |
| C | 13.11804800 | 3.94413200  | 28.32166200 |
| H | 12.59150900 | 4.10809000  | 29.25497700 |
| C | 14.31249000 | 3.22454300  | 28.33286400 |
| H | 14.69619300 | 2.83252300  | 29.26942000 |
| C | 15.00573200 | 3.01568200  | 27.14159600 |

|   |             |             |             |
|---|-------------|-------------|-------------|
| H | 15.93395600 | 2.45363200  | 27.13604700 |
| C | 14.50171100 | 3.52845100  | 25.95066700 |
| H | 15.03362600 | 3.36328200  | 25.02209500 |
| C | 13.29345500 | 4.24569800  | 25.92456300 |
| C | 12.83763600 | 4.73396300  | 24.61452400 |
| C | 13.10716800 | 5.09453800  | 22.40820600 |
| H | 13.05256200 | 4.16656400  | 21.83192600 |
| H | 13.70477800 | 5.82893500  | 21.86917500 |
| C | 11.72606800 | 5.59443300  | 22.86055000 |
| H | 10.92524700 | 5.12707600  | 22.28742000 |
| C | 11.53937600 | 7.12614700  | 22.82316600 |
| H | 10.54871200 | 7.31061300  | 23.24806500 |
| C | 11.53549300 | 7.62396500  | 21.37423800 |
| H | 10.79408600 | 7.08739800  | 20.77172500 |
| H | 12.51399800 | 7.49531400  | 20.89679100 |
| H | 11.29166100 | 8.69085600  | 21.33816600 |
| C | 12.56453200 | 7.87615600  | 23.67946700 |
| H | 13.58724300 | 7.72732600  | 23.31389500 |
| H | 12.52484400 | 7.55832700  | 24.72560800 |
| H | 12.36148100 | 8.95202000  | 23.65313700 |
| C | 8.96098700  | 7.06490000  | 25.28274700 |
| H | 9.54235200  | 7.88507600  | 25.70026500 |
| H | 8.51622800  | 7.31014300  | 24.32040200 |
| C | 8.18186300  | 6.26103200  | 26.20882500 |
| H | 8.31271400  | 6.40881300  | 27.27702900 |
| C | 6.97656500  | 5.57733800  | 25.87166200 |
| C | 6.44392200  | 4.51560700  | 26.78983800 |
| H | 5.38860400  | 4.30389400  | 26.60015900 |
| H | 6.57995100  | 4.78714000  | 27.84011600 |
| H | 7.00060400  | 3.59112900  | 26.60589500 |
| O | 8.80113900  | 4.52453100  | 23.61051200 |
| C | 8.24418900  | 5.36096300  | 22.65446300 |
| H | 8.94022600  | 6.11885800  | 22.24657200 |
| H | 7.89995500  | 4.76501900  | 21.78871300 |
| H | 7.35252400  | 5.92714400  | 22.99836200 |
| H | 6.77280800  | 5.42934600  | 24.81732200 |
| C | 7.08471400  | 9.68953400  | 28.07768300 |
| C | 6.65931000  | 8.93855900  | 26.98165800 |
| C | 5.85203200  | 7.81438600  | 27.18372800 |
| C | 5.47203900  | 7.44115600  | 28.47818800 |
| C | 5.90339600  | 8.19789100  | 29.56710100 |
| C | 6.71425800  | 9.32024000  | 29.37301000 |
| H | 7.70861900  | 10.56318500 | 27.91633900 |
| H | 6.95304200  | 9.21333800  | 25.97370400 |

|   |            |            |             |
|---|------------|------------|-------------|
| H | 4.84701000 | 6.56541000 | 28.62434600 |
| H | 5.60497700 | 7.90822900 | 30.57006200 |
| H | 7.04940800 | 9.90485500 | 30.22402200 |
| N | 5.53923900 | 6.97281000 | 26.08451300 |
| H | 4.65866500 | 6.47244900 | 26.18858400 |
| H | 5.55673300 | 7.46130600 | 25.19175800 |
